# Supplementary material
Source: PubMed Central journal article supplement (PMC7581351)
Supplement: mmc1.pdf [file mmc1.pdf]

# THE LANCET

## Infectious Diseases

### Supplementary appendix

This appendix formed part of the original submission and has been peer reviewed. We post it as supplied by the authors.

Supplement to: Li Y, Campbell H, Kulkarni D, et al. The temporal association of introducing and lifting non-pharmaceutical interventions with the time-varying reproduction number ( $R$ ) of SARS-CoV-2: a modelling study across 131 countries. *Lancet Infect Dis* 2020; published online Oct 22. [https://doi.org/10.1016/S1473-3099\(20\)30785-4](https://doi.org/10.1016/S1473-3099(20)30785-4).

## Contents

|                                                                                                                                                                                                    |    |
|----------------------------------------------------------------------------------------------------------------------------------------------------------------------------------------------------|----|
| Table S1. List of countries included in the analysis.....                                                                                                                                          | 2  |
| Table S2. Details on NPI variables included in the analysis.....                                                                                                                                   | 5  |
| Text S1. Details of the additional analysis using Google mobility data .....                                                                                                                       | 7  |
| Figure S1. Description of change in R and NPIs over time by country .....                                                                                                                          | 8  |
| Figure S2. Duration of included phases by the change in NPI .....                                                                                                                                  | 41 |
| Figure S3. Interaction effects of multiple NPIs introduced/lifted simultaneously, from the main model .....                                                                                        | 42 |
| Figure S4. Time length in days required to reach different levels of effect by introducing/lifting NPIs .....                                                                                      | 43 |
| Figure S5. Effect of introducing/lifting workplace closure and requirement to stay at home on the total visits to workplace and the total time of staying at residential areas, respectively ..... | 44 |
| Figure S6. Time length in days required to reach different levels of effect by introducing/lifting ban on gathering size of >10 persons vs >100 persons.....                                       | 45 |
| Figure S7. Results from the sensitivity analysis that only included phases during which only one NPI was changed.....                                                                              | 46 |
| Figure S8. Results from the sensitivity analysis that used the average R in the last 7 days of the previous phase for calculating R ratio.....                                                     | 47 |
| Figure S9. Results from the sensitivity analysis that excluded early phases in which country's first NPI was introduced.....                                                                       | 48 |
| Figure S10. Results from the sensitivity analysis that excluded countries that could have greater variability in NPI policies .....                                                                | 49 |
| Figure S11. Results from the sensitivity analysis that excluded 10 countries randomly each time for 20 times.....                                                                                  | 50 |
| Figure S12. Results from the sensitivity analysis that included only phases with comprehensive testing .....                                                                                       | 51 |
| Figure S13. Results from the sensitivity analysis that included only phases with comprehensive contact tracing.....                                                                                | 52 |
| Figure S14. Modelled change in the R ratio over time in the first 28 days since the introduction of different composites of NPIs .....                                                             | 53 |

Table S1. List of countries included in the analysis

| Country                          | Start Date | End Date   |
|----------------------------------|------------|------------|
| Afghanistan                      | 16/03/2020 | 20/07/2020 |
| Albania                          | 13/03/2020 | 20/07/2020 |
| Algeria                          | 05/03/2020 | 20/07/2020 |
| Andorra                          | 17/03/2020 | 09/06/2020 |
| Angola                           | 19/04/2020 | 20/07/2020 |
| Argentina                        | 07/03/2020 | 20/07/2020 |
| Australia                        | 04/03/2020 | 20/07/2020 |
| Austria                          | 04/03/2020 | 20/07/2020 |
| Azerbaijan                       | 15/03/2020 | 20/07/2020 |
| Bahrain                          | 26/02/2020 | 20/07/2020 |
| Bangladesh                       | 21/03/2020 | 20/07/2020 |
| Belarus                          | 13/03/2020 | 20/07/2020 |
| Belgium                          | 02/03/2020 | 20/07/2020 |
| Benin                            | 02/04/2020 | 14/07/2020 |
| Bolivia                          | 14/03/2020 | 20/07/2020 |
| Bosnia and Herzegovina           | 16/03/2020 | 20/07/2020 |
| Botswana                         | 10/04/2020 | 20/07/2020 |
| Brazil                           | 06/03/2020 | 20/07/2020 |
| Bulgaria                         | 13/03/2020 | 20/07/2020 |
| Cameroon                         | 18/03/2020 | 20/07/2020 |
| Canada                           | 06/03/2020 | 20/07/2020 |
| Cape Verde                       | 16/04/2020 | 20/07/2020 |
| Central African Republic         | 28/04/2020 | 14/07/2020 |
| Chad                             | 14/04/2020 | 26/06/2020 |
| Chile                            | 09/03/2020 | 20/07/2020 |
| China                            | 01/01/2020 | 11/07/2020 |
| Colombia                         | 12/03/2020 | 20/07/2020 |
| Congo                            | 29/03/2020 | 18/07/2020 |
| Costa Rica                       | 12/03/2020 | 20/07/2020 |
| Cote d'Ivoire                    | 21/03/2020 | 20/07/2020 |
| Croatia                          | 13/03/2020 | 19/07/2020 |
| Cuba                             | 20/03/2020 | 26/06/2020 |
| Czechia                          | 07/03/2020 | 20/07/2020 |
| Democratic Republic of the Congo | 19/03/2020 | 20/07/2020 |
| Denmark                          | 06/03/2020 | 20/07/2020 |
| Djibouti                         | 26/03/2020 | 26/06/2020 |
| Dominican Republic               | 14/03/2020 | 20/07/2020 |
| Ecuador                          | 02/03/2020 | 20/07/2020 |
| Egypt                            | 07/03/2020 | 20/07/2020 |
| El Salvador                      | 29/03/2020 | 20/07/2020 |
| Estonia                          | 07/03/2020 | 25/06/2020 |
| Ethiopia                         | 31/03/2020 | 20/07/2020 |
| Finland                          | 06/03/2020 | 26/06/2020 |
| France                           | 08/02/2020 | 11/07/2020 |
| Gabon                            | 01/04/2020 | 20/07/2020 |
| Gambia                           | 12/04/2020 | 18/07/2020 |
| Germany                          | 28/02/2020 | 20/07/2020 |
| Ghana                            | 21/03/2020 | 20/07/2020 |
| Greece                           | 06/03/2020 | 20/07/2020 |
| Guatemala                        | 17/03/2020 | 20/07/2020 |

| <b>Country</b>     | <b>Start Date</b> | <b>End Date</b> |
|--------------------|-------------------|-----------------|
| <b>Guinea</b>      | 31/03/2020        | 20/07/2020      |
| <b>Haiti</b>       | 30/03/2020        | 20/07/2020      |
| <b>Hungary</b>     | 14/03/2020        | 25/06/2020      |
| <b>Iceland</b>     | 04/03/2020        | 26/06/2020      |
| <b>India</b>       | 05/03/2020        | 20/07/2020      |
| <b>Indonesia</b>   | 11/03/2020        | 20/07/2020      |
| <b>Iran</b>        | 22/02/2020        | 20/07/2020      |
| <b>Iraq</b>        | 01/03/2020        | 20/07/2020      |
| <b>Ireland</b>     | 06/03/2020        | 26/06/2020      |
| <b>Israel</b>      | 05/03/2020        | 20/07/2020      |
| <b>Italy</b>       | 22/02/2020        | 20/07/2020      |
| <b>Japan</b>       | 05/02/2020        | 11/07/2020      |
| <b>Kazakhstan</b>  | 15/03/2020        | 20/07/2020      |
| <b>Kenya</b>       | 23/03/2020        | 20/07/2020      |
| <b>Kosovo</b>      | 16/03/2020        | 20/07/2020      |
| <b>Kuwait</b>      | 26/02/2020        | 20/07/2020      |
| <b>Kyrgyzstan</b>  | 22/03/2020        | 14/07/2020      |
| <b>Latvia</b>      | 13/03/2020        | 26/06/2020      |
| <b>Lebanon</b>     | 02/03/2020        | 11/07/2020      |
| <b>Lesotho</b>     | 24/06/2020        | 20/07/2020      |
| <b>Libya</b>       | 30/03/2020        | 11/07/2020      |
| <b>Lithuania</b>   | 16/03/2020        | 26/06/2020      |
| <b>Luxembourg</b>  | 13/03/2020        | 11/07/2020      |
| <b>Madagascar</b>  | 24/03/2020        | 11/07/2020      |
| <b>Malaysia</b>    | 04/03/2020        | 25/06/2020      |
| <b>Mali</b>        | 29/03/2020        | 26/06/2020      |
| <b>Mauritania</b>  | 15/05/2020        | 11/07/2020      |
| <b>Mexico</b>      | 13/03/2020        | 11/07/2020      |
| <b>Moldova</b>     | 15/03/2020        | 11/07/2020      |
| <b>Mongolia</b>    | 15/04/2020        | 19/06/2020      |
| <b>Morocco</b>     | 15/03/2020        | 11/07/2020      |
| <b>Mozambique</b>  | 09/04/2020        | 11/07/2020      |
| <b>Namibia</b>     | 20/06/2020        | 11/07/2020      |
| <b>Netherlands</b> | 01/03/2020        | 11/07/2020      |
| <b>New Zealand</b> | 18/03/2020        | 25/06/2020      |
| <b>Niger</b>       | 25/03/2020        | 26/06/2020      |
| <b>Nigeria</b>     | 19/03/2020        | 11/07/2020      |
| <b>Norway</b>      | 01/03/2020        | 23/06/2020      |
| <b>Oman</b>        | 05/03/2020        | 11/07/2020      |
| <b>Pakistan</b>    | 10/03/2020        | 11/07/2020      |
| <b>Palestine</b>   | 06/03/2020        | 11/07/2020      |
| <b>Panama</b>      | 11/03/2020        | 11/07/2020      |
| <b>Paraguay</b>    | 21/03/2020        | 11/07/2020      |
| <b>Peru</b>        | 09/03/2020        | 11/07/2020      |
| <b>Philippines</b> | 10/03/2020        | 11/07/2020      |
| <b>Poland</b>      | 09/03/2020        | 11/07/2020      |
| <b>Portugal</b>    | 08/03/2020        | 11/07/2020      |
| <b>Puerto Rico</b> | 28/03/2020        | 11/07/2020      |
| <b>Qatar</b>       | 04/03/2020        | 11/07/2020      |
| <b>Romania</b>     | 08/03/2020        | 11/07/2020      |
| <b>Russia</b>      | 07/03/2020        | 11/07/2020      |
| <b>Rwanda</b>      | 21/03/2020        | 11/07/2020      |

| <b>Country</b>                  | <b>Start Date</b> | <b>End Date</b> |
|---------------------------------|-------------------|-----------------|
| <b>Saudi Arabia</b>             | 11/03/2020        | 11/07/2020      |
| <b>Senegal</b>                  | 14/03/2020        | 11/07/2020      |
| <b>Serbia</b>                   | 12/03/2020        | 11/07/2020      |
| <b>Sierra Leone</b>             | 18/04/2020        | 26/06/2020      |
| <b>Singapore</b>                | 05/02/2020        | 11/07/2020      |
| <b>Slovakia</b>                 | 13/03/2020        | 26/06/2020      |
| <b>South Africa</b>             | 12/03/2020        | 11/07/2020      |
| <b>South Korea</b>              | 01/02/2020        | 11/07/2020      |
| <b>South Sudan</b>              | 29/04/2020        | 23/06/2020      |
| <b>Spain</b>                    | 26/02/2020        | 10/07/2020      |
| <b>Sri Lanka</b>                | 15/03/2020        | 26/06/2020      |
| <b>Sudan</b>                    | 14/04/2020        | 11/07/2020      |
| <b>Suriname</b>                 | 01/06/2020        | 11/07/2020      |
| <b>Sweden</b>                   | 28/02/2020        | 11/07/2020      |
| <b>Switzerland</b>              | 28/02/2020        | 11/07/2020      |
| <b>Tajikistan</b>               | 01/05/2020        | 11/07/2020      |
| <b>Thailand</b>                 | 28/01/2020        | 26/06/2020      |
| <b>Tunisia</b>                  | 13/03/2020        | 26/06/2020      |
| <b>Turkey</b>                   | 16/03/2020        | 11/07/2020      |
| <b>Uganda</b>                   | 24/03/2020        | 26/06/2020      |
| <b>Ukraine</b>                  | 18/03/2020        | 11/07/2020      |
| <b>United Arab Emirates</b>     | 28/02/2020        | 11/07/2020      |
| <b>United Kingdom</b>           | 01/03/2020        | 11/07/2020      |
| <b>United States of America</b> | 22/02/2020        | 11/07/2020      |
| <b>Uzbekistan</b>               | 16/03/2020        | 11/07/2020      |
| <b>Venezuela</b>                | 15/03/2020        | 11/07/2020      |
| <b>Yemen</b>                    | 30/04/2020        | 26/06/2020      |
| <b>Zambia</b>                   | 26/03/2020        | 11/07/2020      |
| <b>Zimbabwe</b>                 | 16/04/2020        | 11/07/2020      |

Table S2. Details on NPI variables included in the analysis

| NPI variable                             | Levels in the original OxCGRT dataset                                                                                                        | Levels re-coded in the present study                               |
|------------------------------------------|----------------------------------------------------------------------------------------------------------------------------------------------|--------------------------------------------------------------------|
| <b>School closing</b>                    | 0 – No measures                                                                                                                              | 0 – Not ordered                                                    |
|                                          | 1 – recommend closing                                                                                                                        | 0 – Not ordered                                                    |
|                                          | 2 – Require closing (only some levels or categories, eg just high school, or just public schools)                                            | 1 – Ordered                                                        |
|                                          | 3 – Require closing all levels                                                                                                               | 1 – Ordered                                                        |
| <b>Workplace closing</b>                 | 0 - No measures                                                                                                                              | 0 – Not ordered                                                    |
|                                          | 1 - recommend closing (or work from home)                                                                                                    | 0 – Not ordered                                                    |
|                                          | 2 - require closing (or work from home) for some sectors or categories of workers                                                            | 1 – Ordered                                                        |
|                                          | 3 - require closing (or work from home) all-but-essential workplaces (e.g. grocery stores, doctors)                                          | 1 – Ordered                                                        |
| <b>Public events ban</b>                 | 0 – No measures                                                                                                                              | 0 – Not ordered                                                    |
|                                          | 1 – Recommend cancelling                                                                                                                     | 1 – Ordered                                                        |
|                                          | 2 - Require cancelling                                                                                                                       | 1 – Ordered                                                        |
| <b>Restrictions on gatherings</b>        | 0 - No restrictions                                                                                                                          | 0 – Not ordered                                                    |
|                                          | 1 - Restrictions on very large gatherings (the limit is above 1000 people)                                                                   | 0 – Ordered but no restrictions on small ( $\leq 10$ ) gatherings  |
|                                          | 2 - Restrictions on gatherings between 101-1000 people                                                                                       | 0 – Ordered but no restrictions on small ( $\leq 10$ ) gatherings  |
|                                          | 3 - Restrictions on gatherings between 11-100 people                                                                                         | 0 – Ordered but no restrictions on small ( $\leq 10$ ) gatherings* |
|                                          | 4 - Restrictions on gatherings of 10 people or less                                                                                          | 1 – Ordered with restrictions on small ( $\leq 10$ ) gatherings    |
| <b>Public transport closing</b>          | 0 - No measures                                                                                                                              | 0 – Not ordered                                                    |
|                                          | 1 - Recommend closing (or significantly reduce volume/route/means of transport available)                                                    | 0 – Not ordered                                                    |
|                                          | 2 - Require closing (or prohibit most citizens from using it)                                                                                | 1 – Ordered                                                        |
| <b>Stay at home orders</b>               | 0 - No measures                                                                                                                              | 0 – Not ordered                                                    |
|                                          | 1 - recommend not leaving house                                                                                                              | 0 – Not ordered                                                    |
|                                          | 2 - require not leaving house with exceptions for daily exercise, grocery shopping, and ‘essential’ trips                                    | 1 – Ordered                                                        |
|                                          | 3 - Require not leaving house with minimal exceptions (e.g. allowed to leave only once a week, or only one person can leave at a time, etc.) | 1 – Ordered                                                        |
| <b>Restrictions on internal movement</b> | 0 - No measures                                                                                                                              | 0 – Not ordered                                                    |
|                                          | 1 - Recommend not to travel between regions/cities                                                                                           | 0 – Not ordered                                                    |

| <b>NPI variable</b>                  | <b>Levels in the original OxCGRT dataset</b>   | <b>Levels re-coded in the present study</b> |
|--------------------------------------|------------------------------------------------|---------------------------------------------|
|                                      | 2 – internal movement restrictions in place    | 1 – Ordered                                 |
| <b>International travel controls</b> | 0 - No measures                                | 0 – Not ordered                             |
|                                      | 1 - Screening                                  | 0 – Not ordered                             |
|                                      | 2 - Quarantine arrivals from high-risk regions | 1 – Ordered                                 |
|                                      | 3 - Ban on arrivals from some regions          | 1 – Ordered                                 |

\*This is coded as 1 in the sensitivity analysis that used gathering size of 100 as the cutoff.

## Text S1. Details of the additional analysis using Google mobility data

Google mobility data were extracted from <https://ourworldindata.org/covid-mobility-trends>, which was compiled based on Google COVID-19 Mobility Reports (<https://www.google.com/covid19/mobility/>). These data were aggregated from mobile device location information covering the period between 3<sup>rd</sup> January 2020 and 20<sup>th</sup> July 2020. Mobility data of six categories were available: visits to workplace, visits to retail and recreation places, visits to grocery and pharmacy stores, visits to public transit stations, visits to parks and outdoor spaces, and total time of staying at residential areas.

We selected visits to workplace and total time of staying at residential areas as the outcomes for the analysis as the two outcomes are most relevant to workplace closure and requirement to stay at home, respectively. We included a total of 101 countries in this analysis that had available data of both NPIs (from OxCGRT) and mobility: Afghanistan, Angola, Argentina, Australia, Austria, Bahrain, Bangladesh, Belarus, Belgium, Benin, Bolivia, Bosnia and Herzegovina, Botswana, Brazil, Bulgaria, Cameroon, Canada, Cape, Verde, Chile, Colombia, Costa Rica, Croatia, Czechia, Denmark, Dominican Republic, Ecuador, Egypt, El Salvador, Estonia, Finland, France, Gabon, Germany, Ghana, Greece, Guatemala, Haiti, Hungary, India, Indonesia, Ireland, Israel, Italy, Japan, Kenya, Kuwait, Kyrgyzstan, Latvia, Lebanon, Libya, Lithuania, Luxembourg, Malaysia, Mali, Mexico, Moldova, Mongolia, Morocco, Mozambique, Namibia, Netherlands, New Zealand, Niger, Nigeria, Norway, Oman, Pakistan, Panama, Paraguay, Peru, Philippines, Poland, Portugal, Puerto Rico, Qatar, Romania, Russia, Rwanda, Saudi Arabia, Senegal, Serbia, Singapore, Slovakia, South Africa, South Korea, Spain, Sri Lanka, Sweden, Switzerland, Tajikistan, Thailand, Turkey, Uganda, Ukraine, United Arab Emirates, United Kingdom, United States, Venezuela, Yemen, Zambia, and Zimbabwe. We used the same log-linear regression model as the main analysis, for each of the two outcomes:

$$\log(Y^t) = \beta_0^t + \beta_1^t X_1^t + \beta_2^t X_2^t + \dots + \beta_{16}^t X_{16}^t + \beta_{17}^t Z_1^t + \beta_{18}^t Z_2^t$$

where  $Y^t$  represents the ratio of total visits to workplace or total time of staying at residential areas on Day  $t$  ( $t = 1, 2, \dots, 28$ ), over Day 0;  $X_1^t$  to  $X_{16}^t$  are binary indicators of whether each of the eight NPIs are introduced and lifted, respectively;  $Z_1^t$  and  $Z_2^t$  are binary indicators of whether multiple NPIs are introduced and lifted simultaneously, respectively. Hence,  $\beta_0^t$  represents the baseline change in mobility on Day  $t$  in the absence of changes in NPI status;  $\beta_1^t$  to  $\beta_{16}^t$  represent the individual effects of introducing and lifting NPIs on Day  $t$ ;  $\beta_{17}^t$  and  $\beta_{18}^t$  represent the interaction between introducing and lifting multiple NPIs are introduced and lifted simultaneously, respectively.

We reported the effect over time of introducing and lifting workplace closure on the total visits of workplace and the effect over time of introducing and lifting requirement to stay at home on the total time of staying at residential areas. We compared the immediacy of introducing and lifting these two NPIs between using R and using mobility data; immediacy was measured by the time length in days needed to observe 60% of the maximum change in the outcome measures for the first 28 days following introducing/lifting an NPI.



Figure S1. Description of change in R and NPIs over time by country

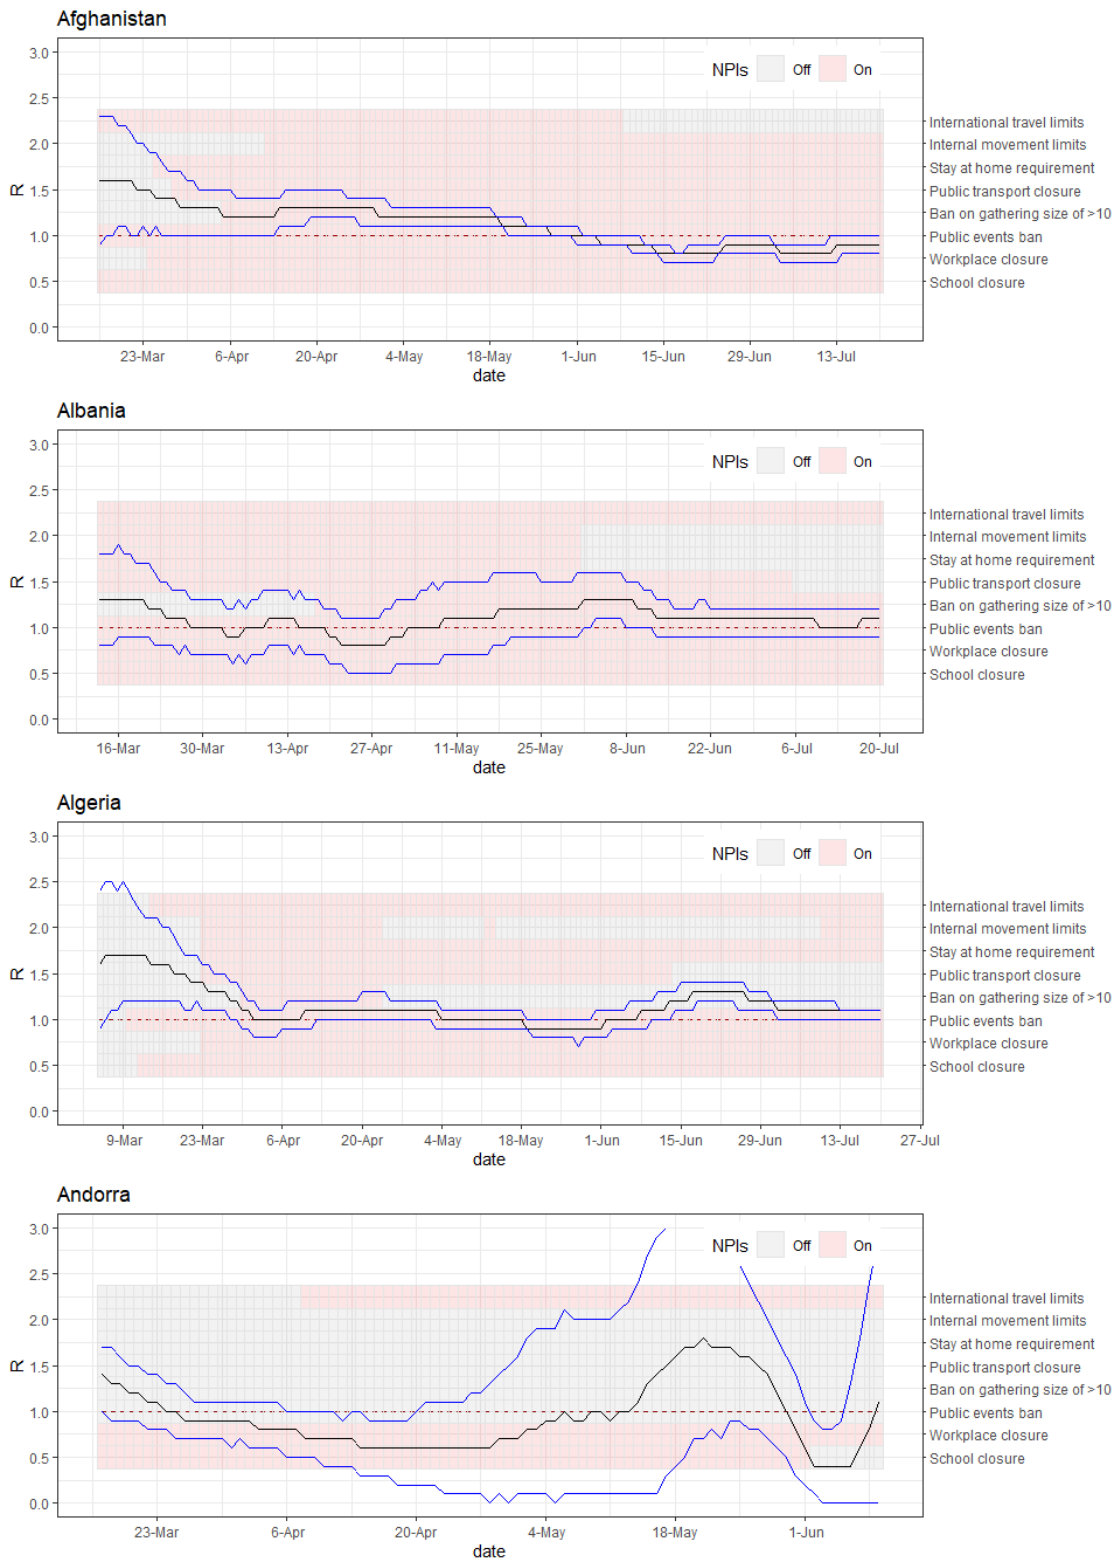

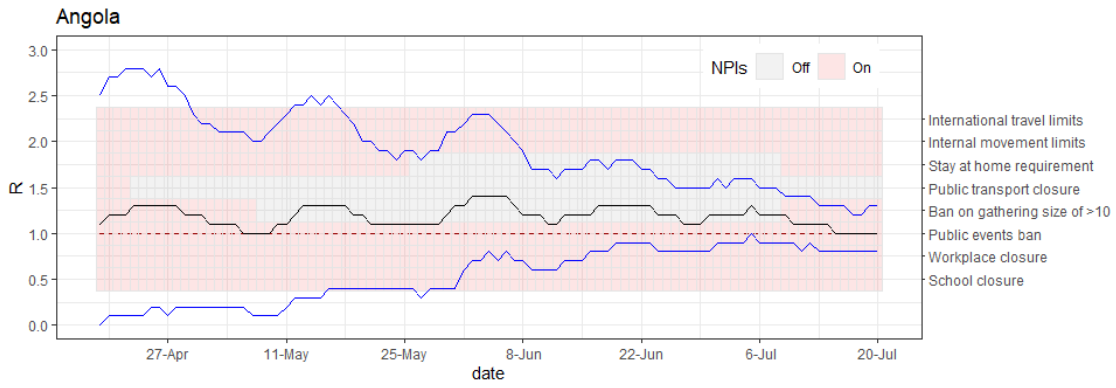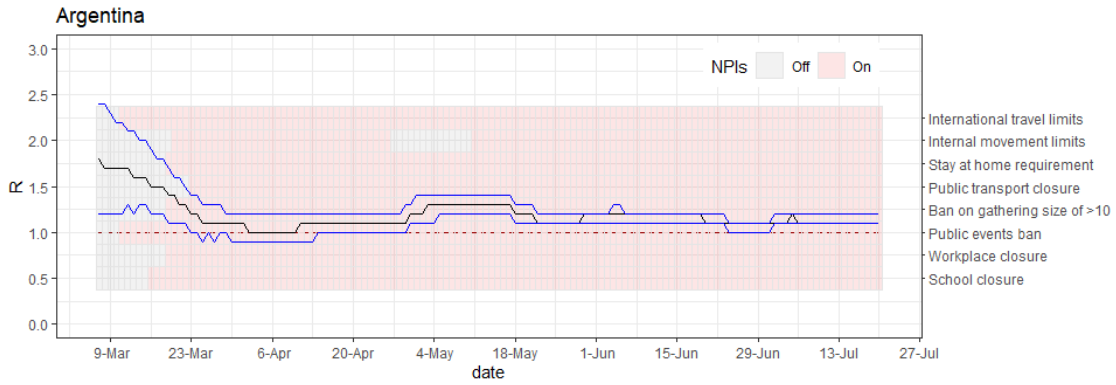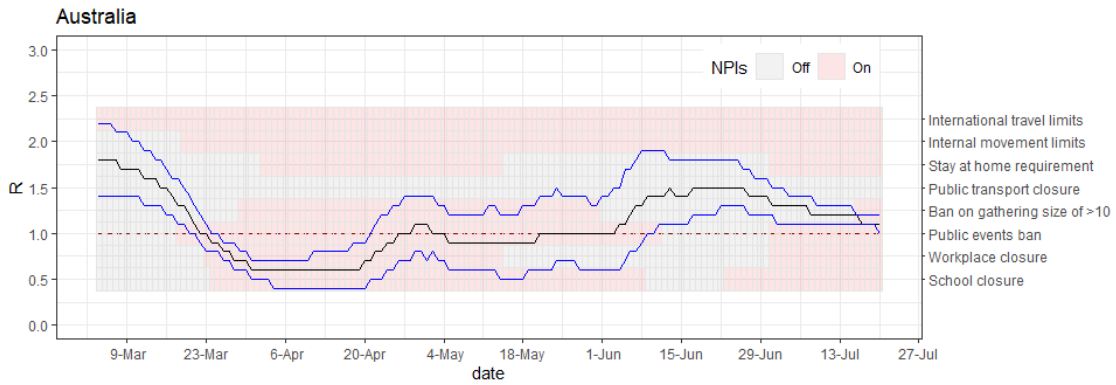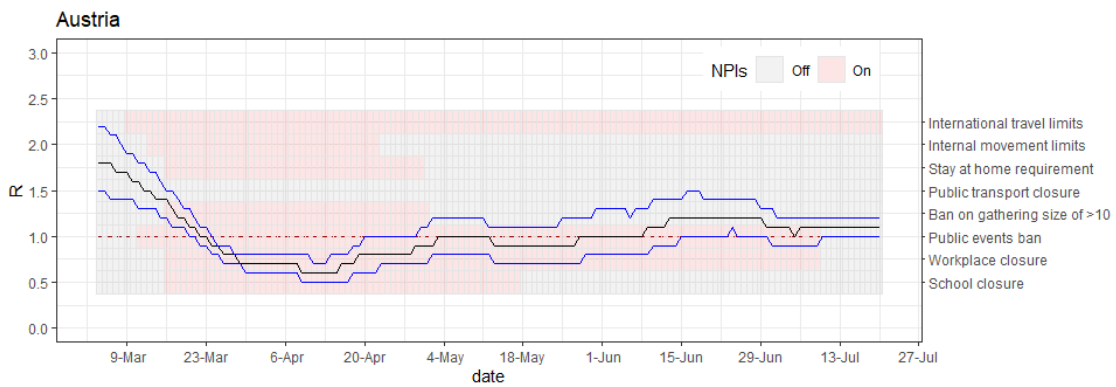

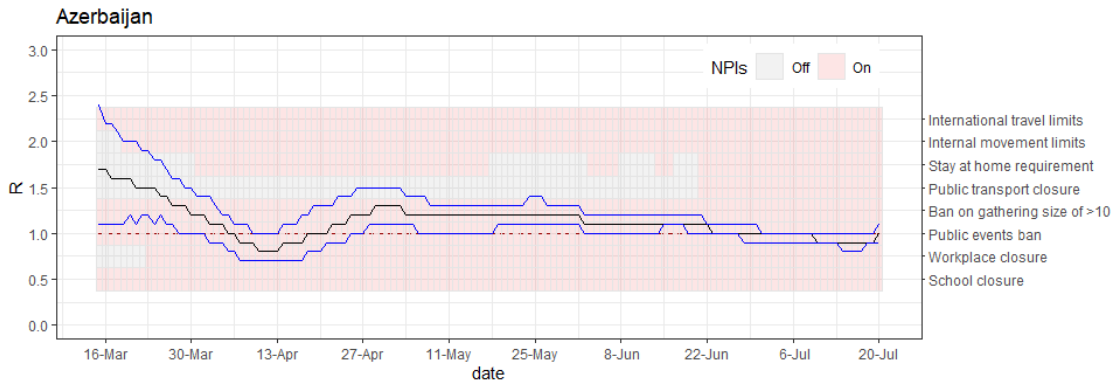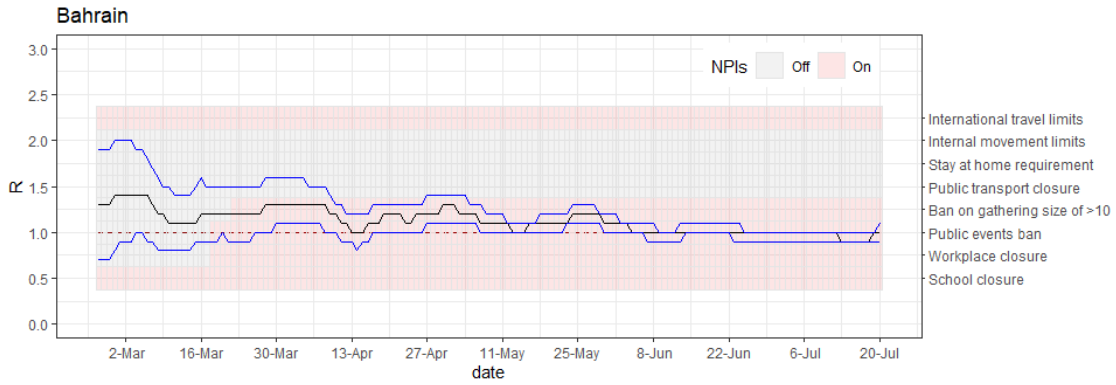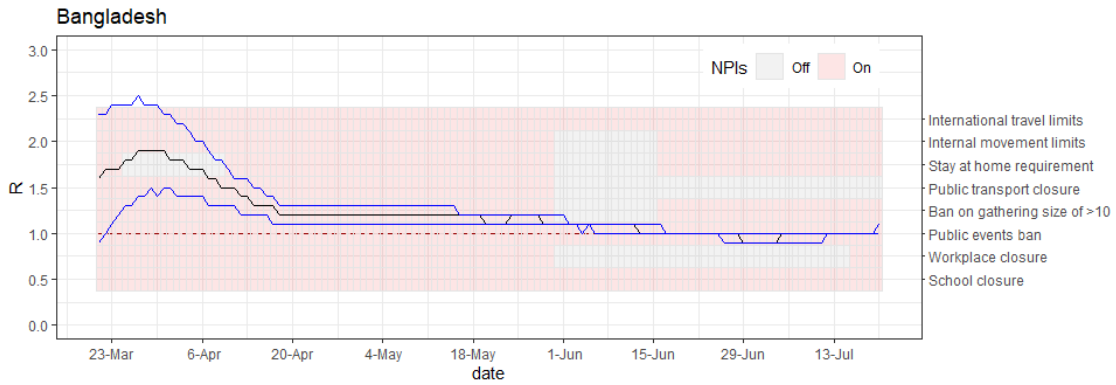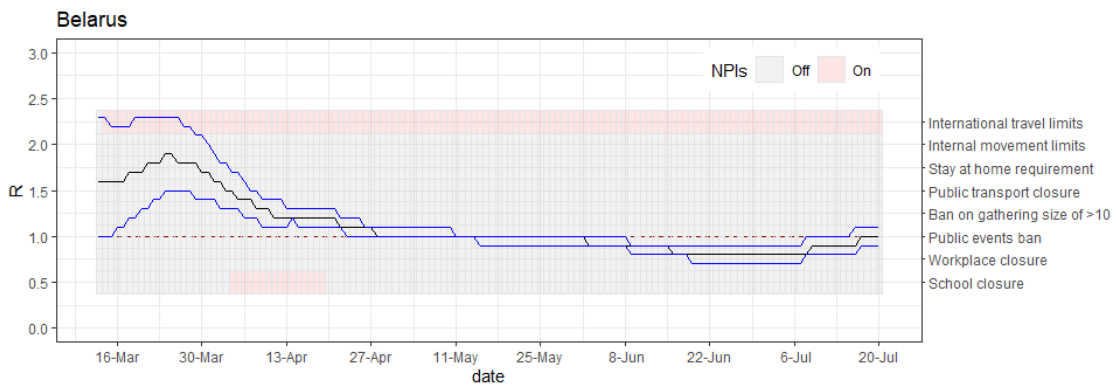

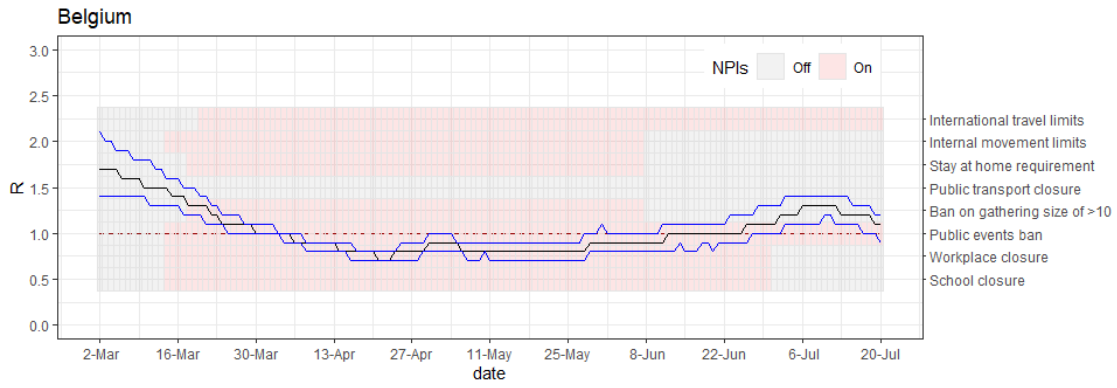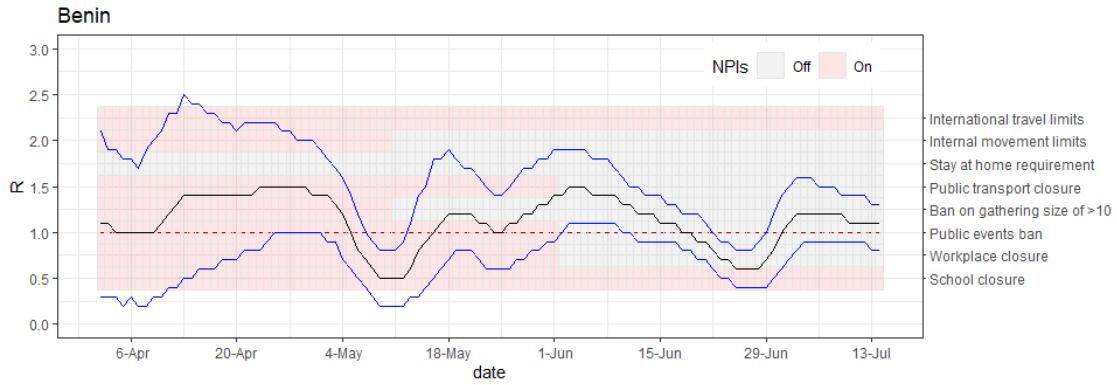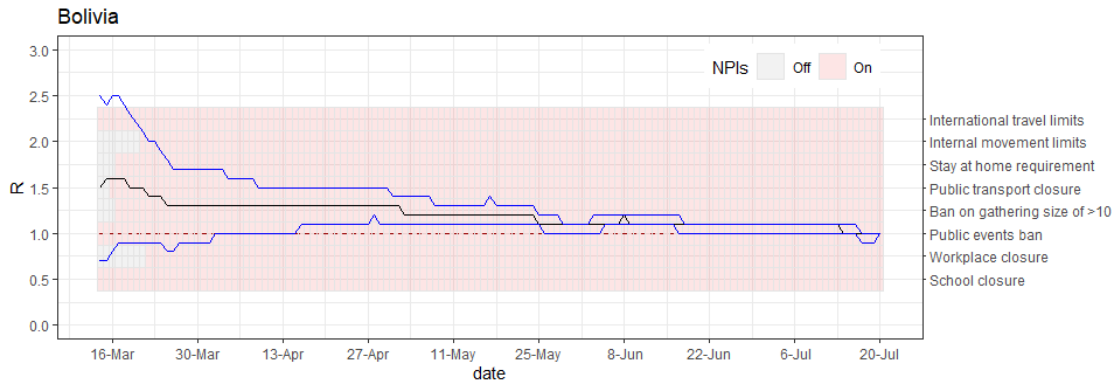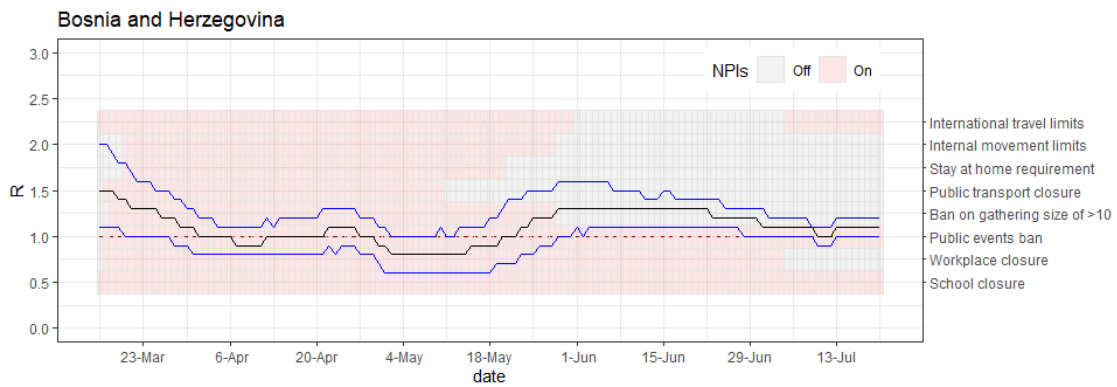

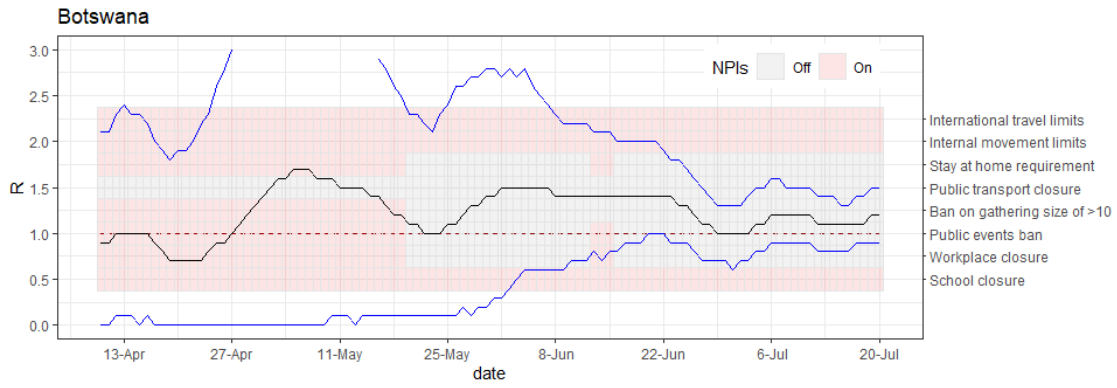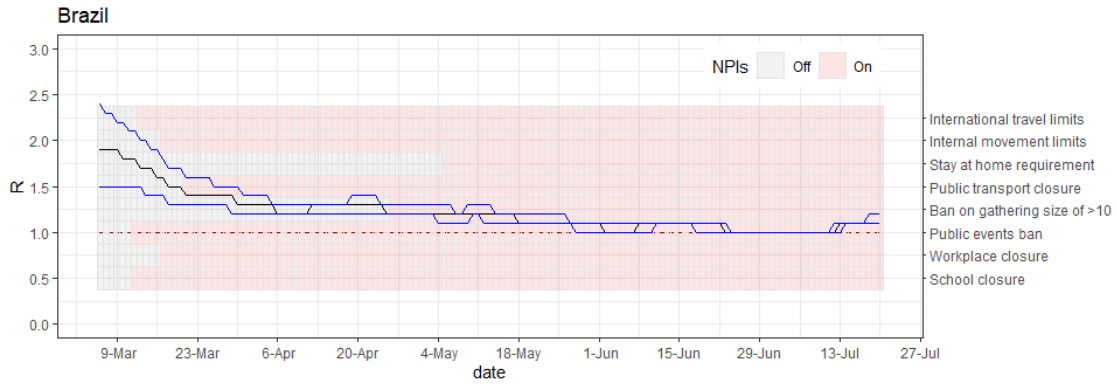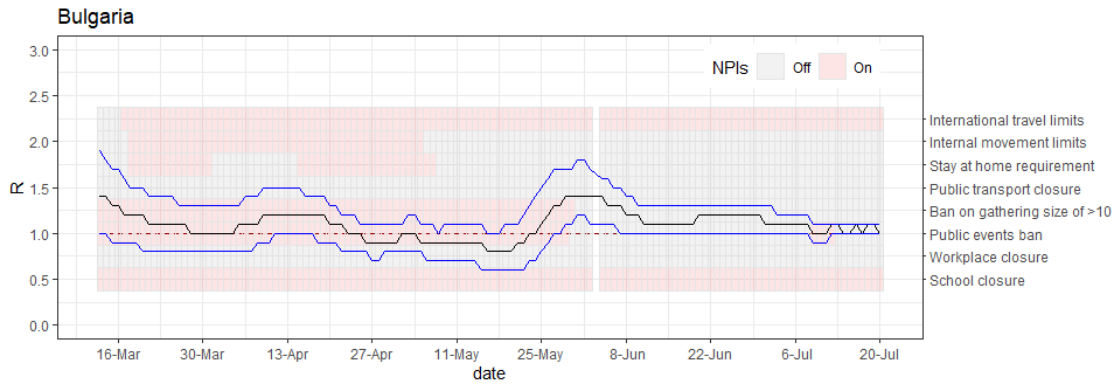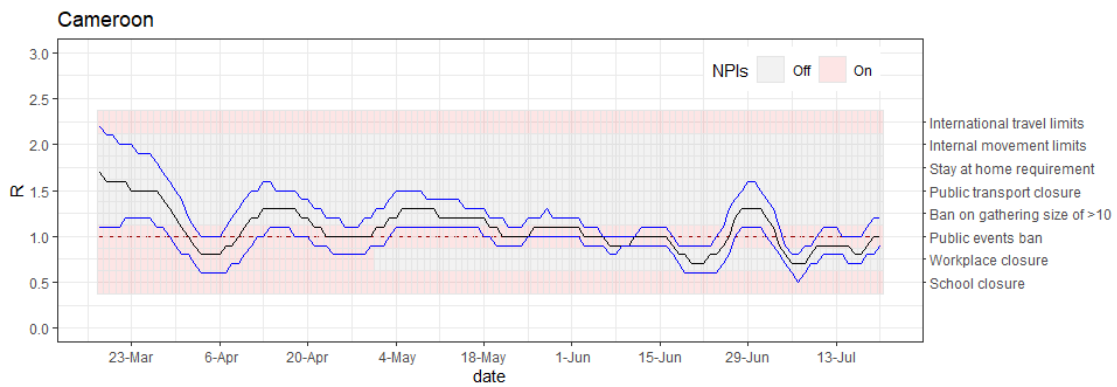

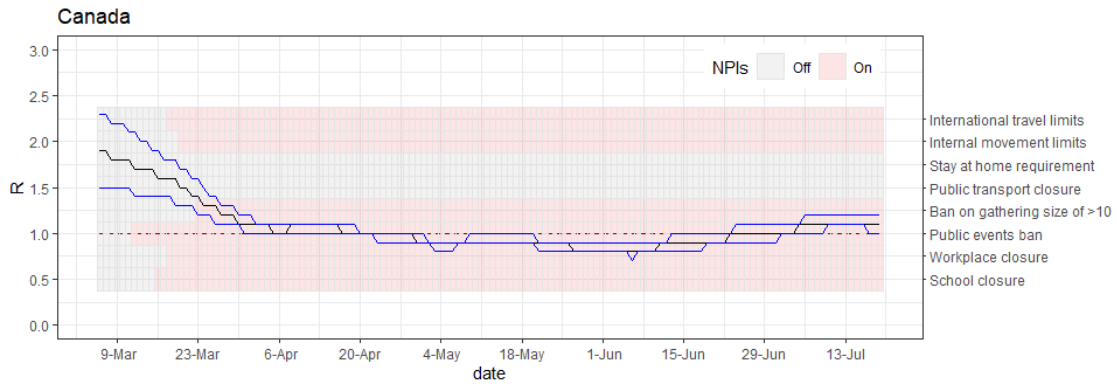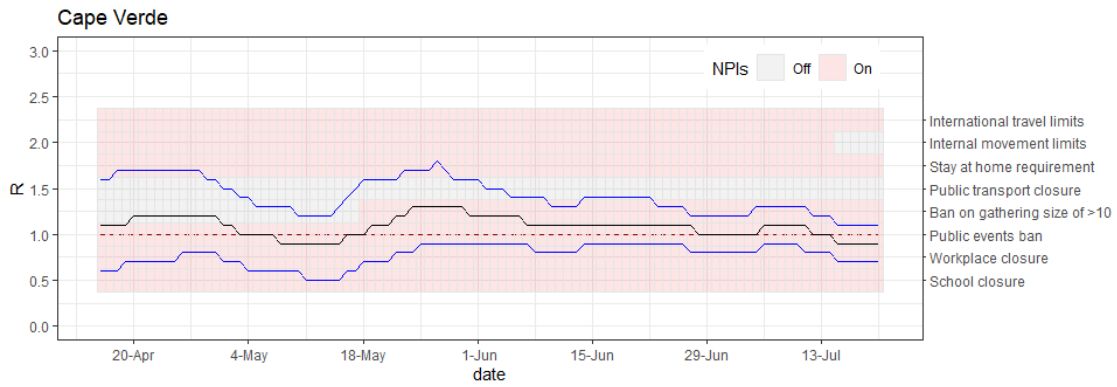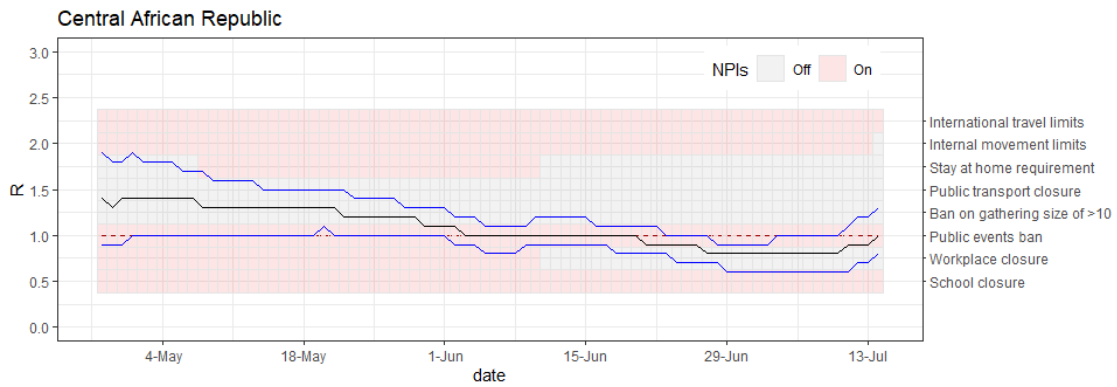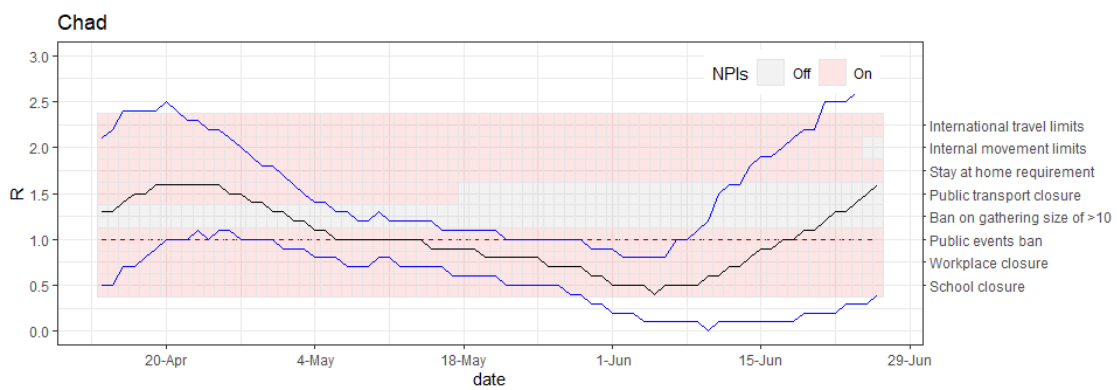

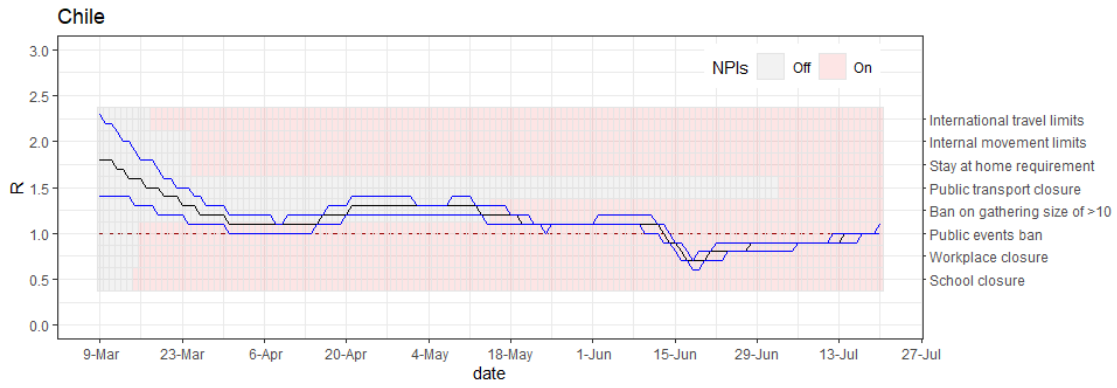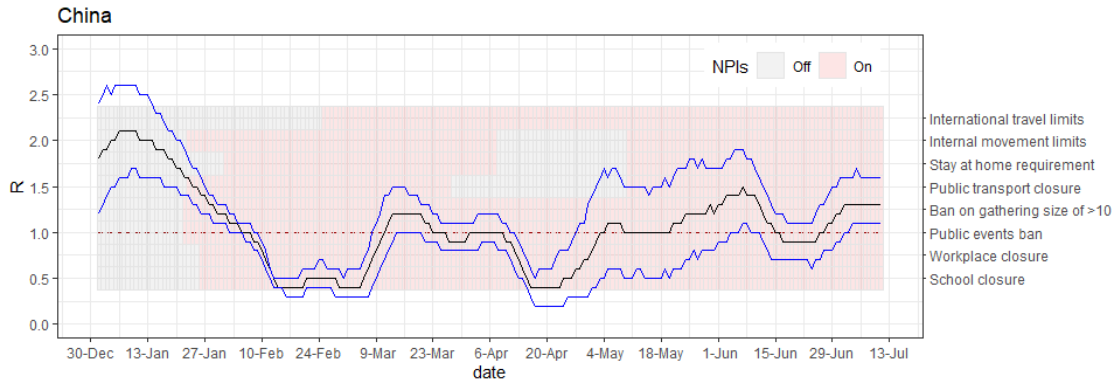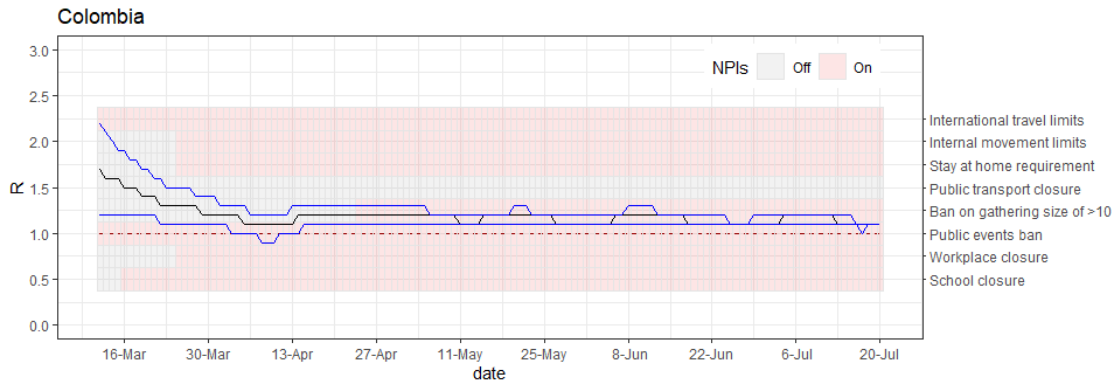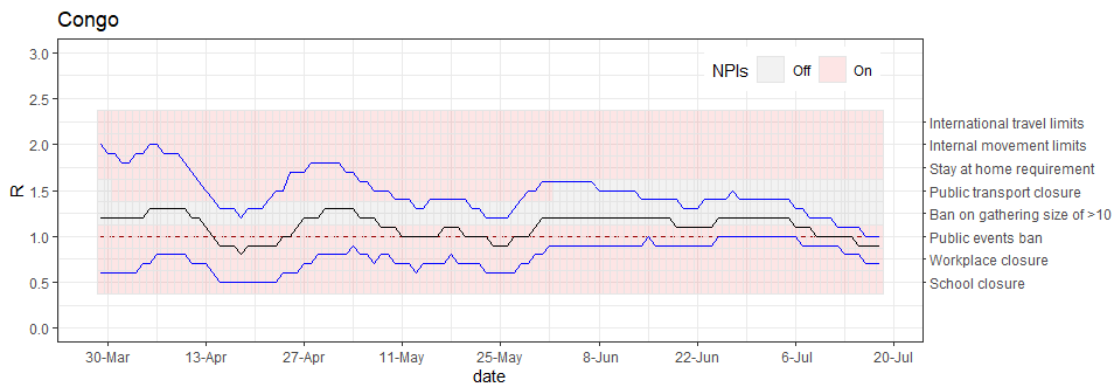

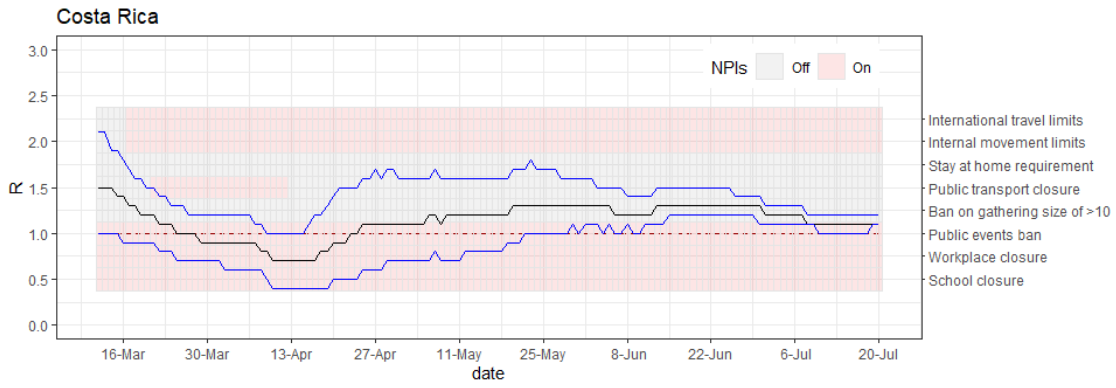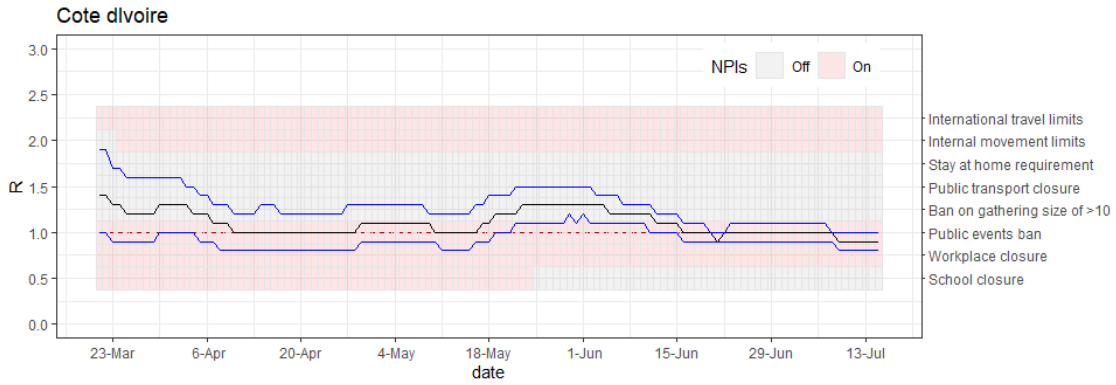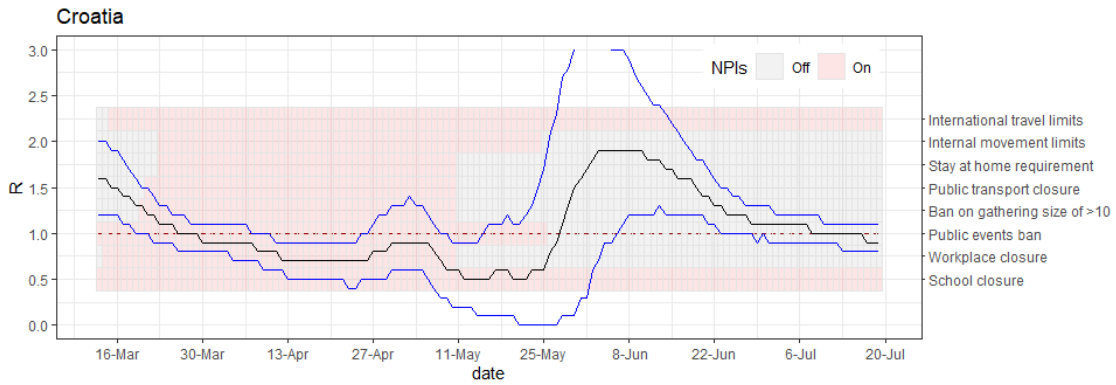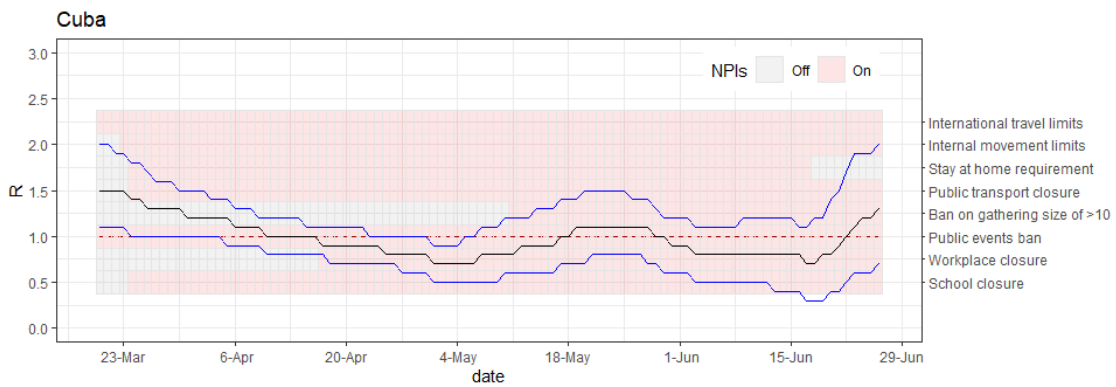



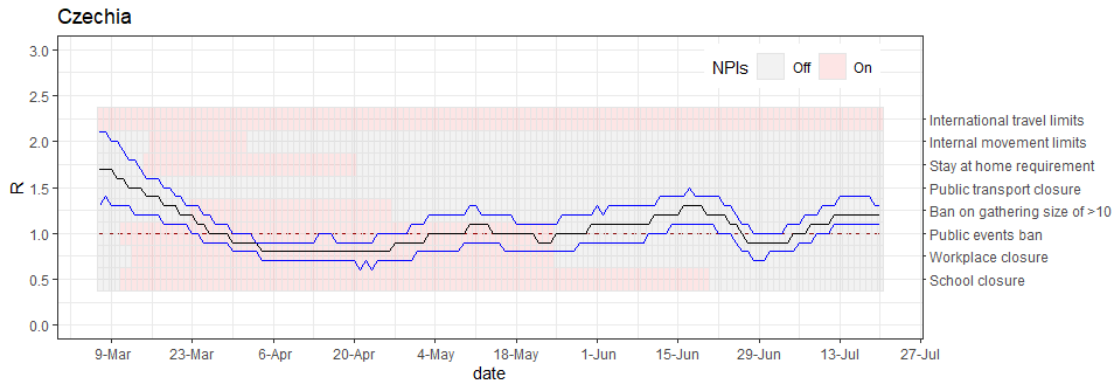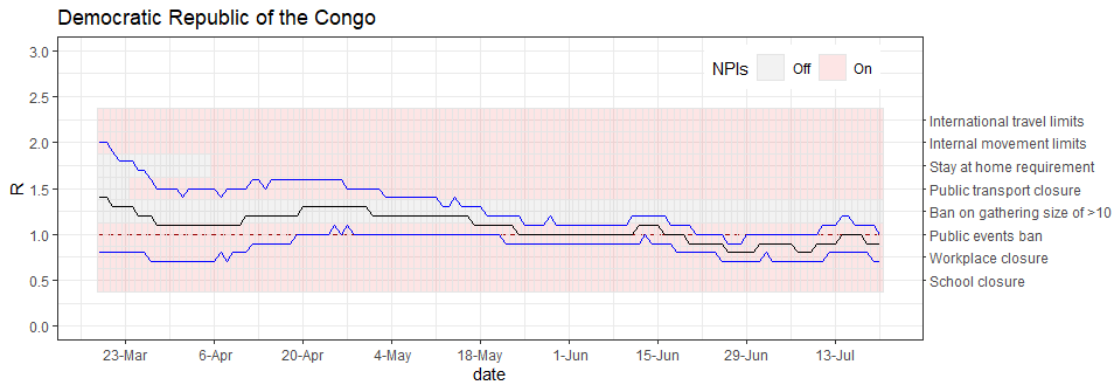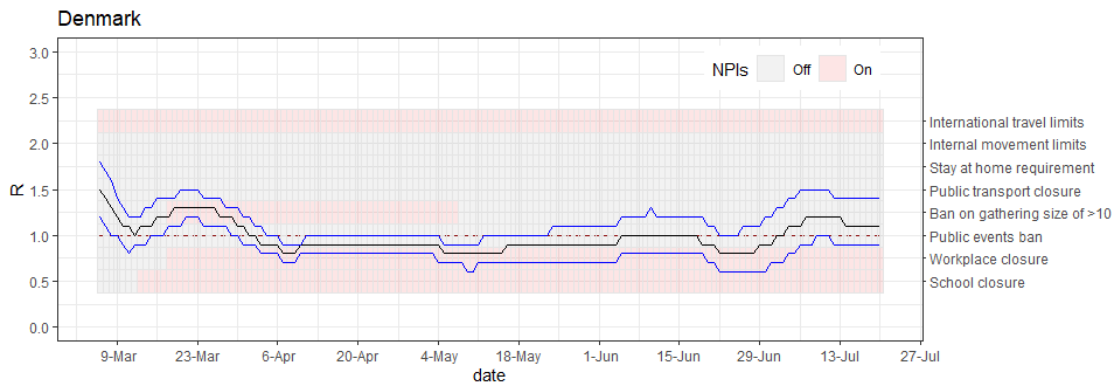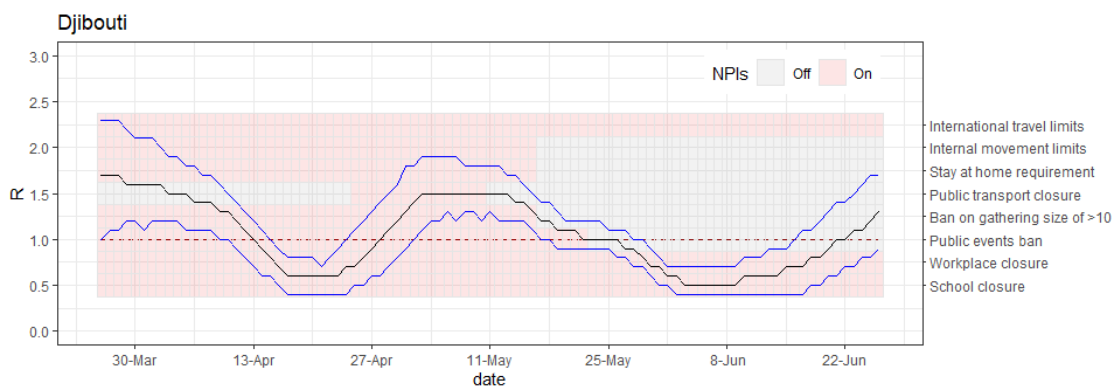

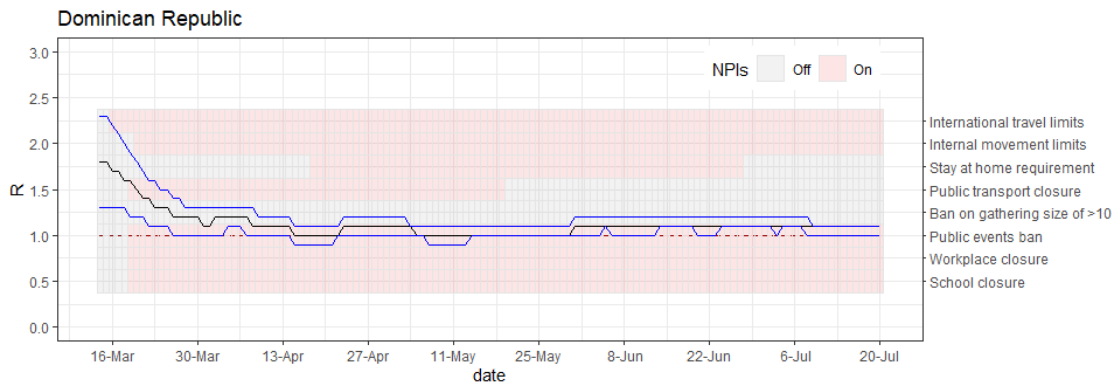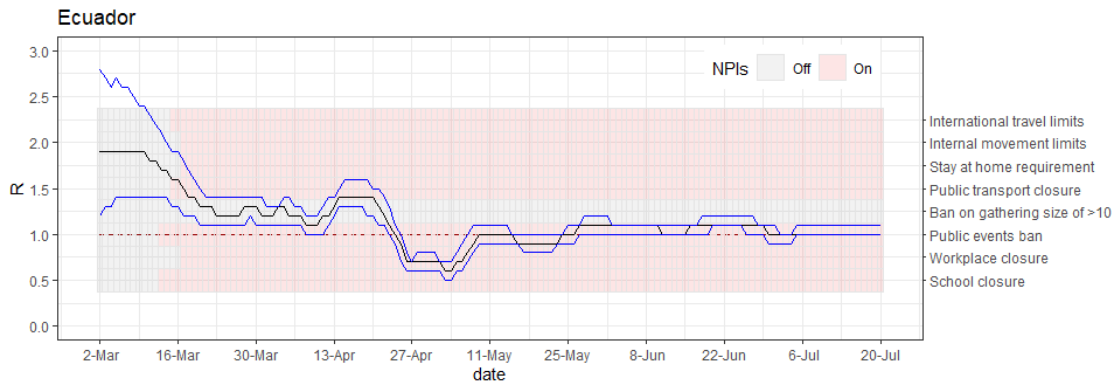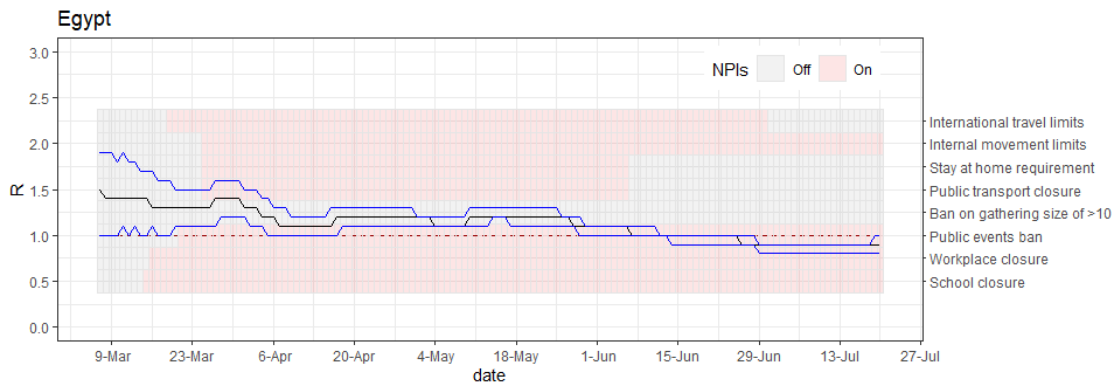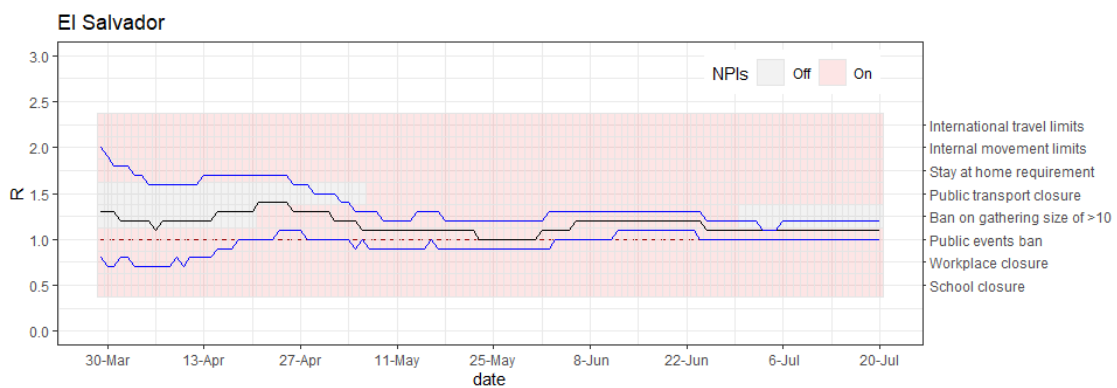

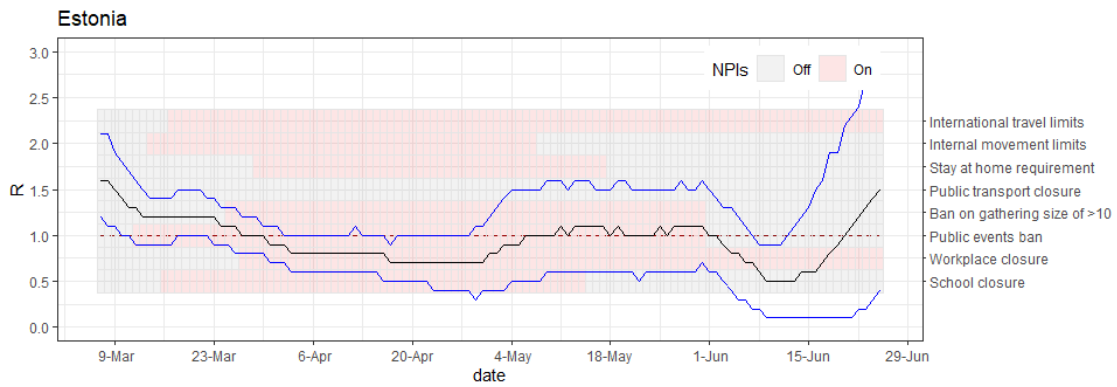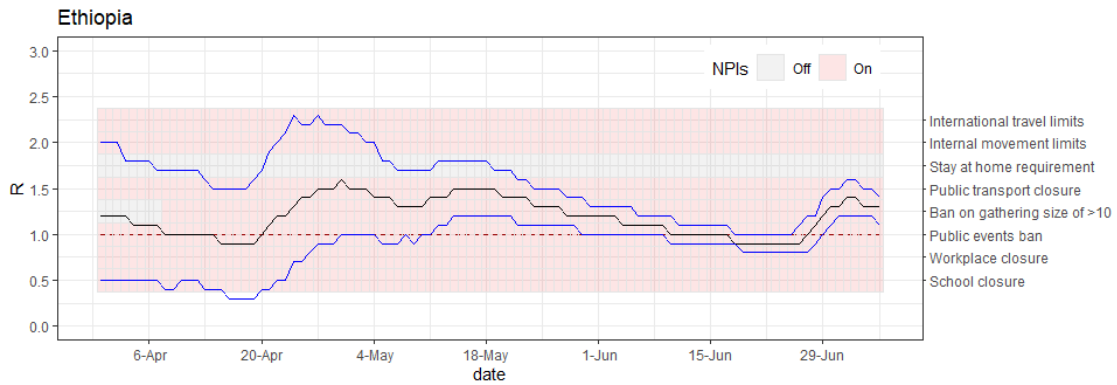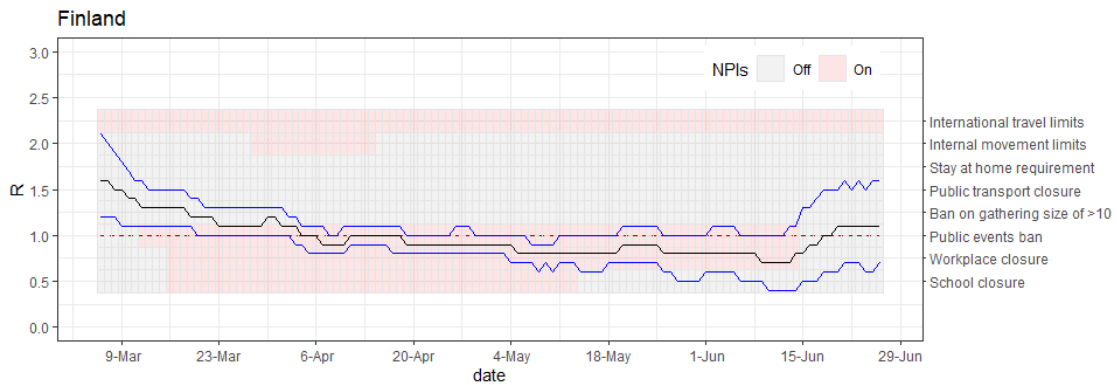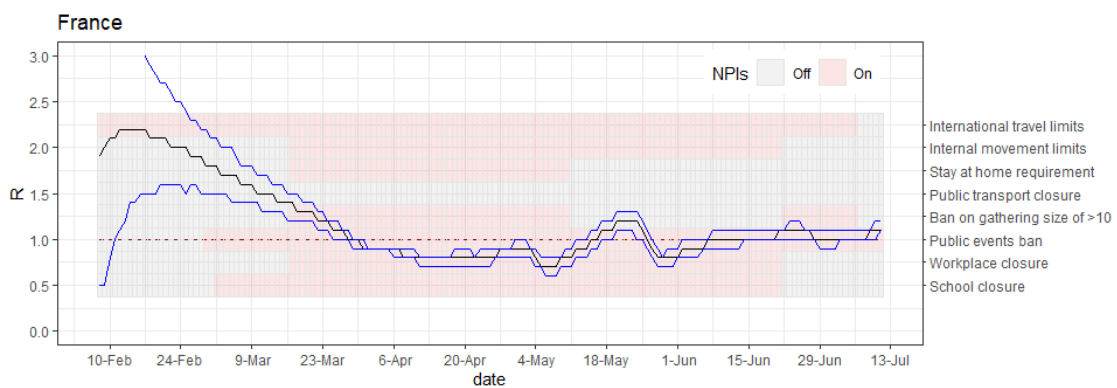

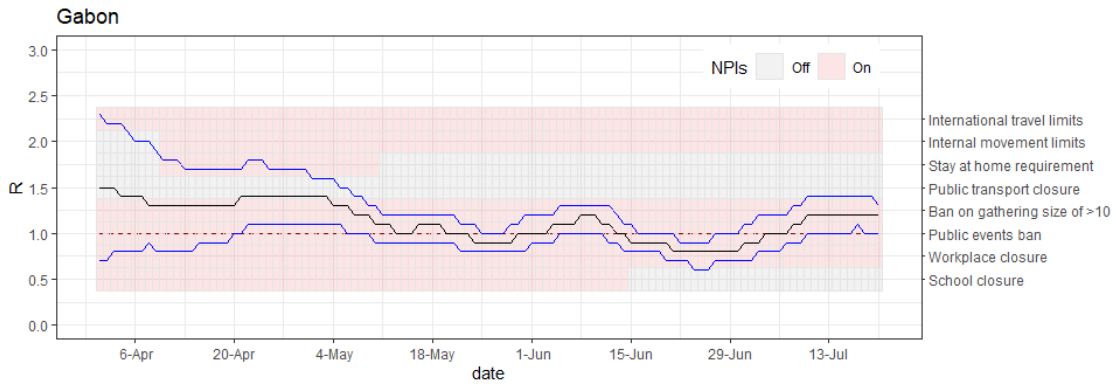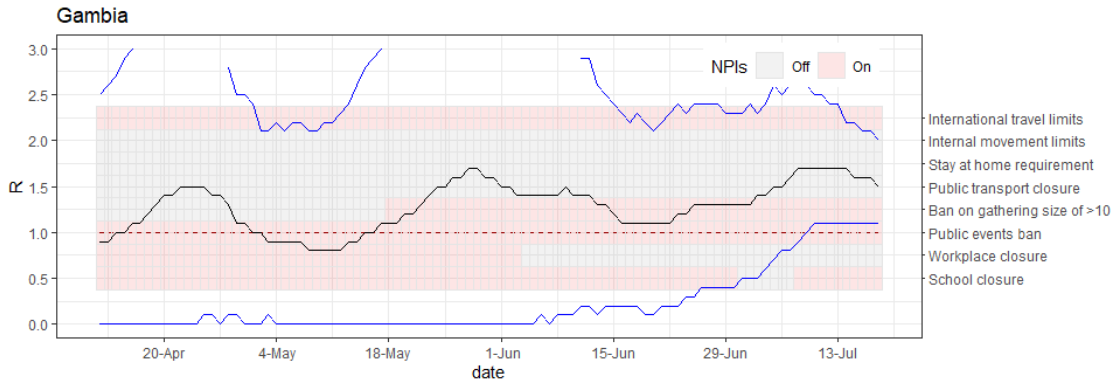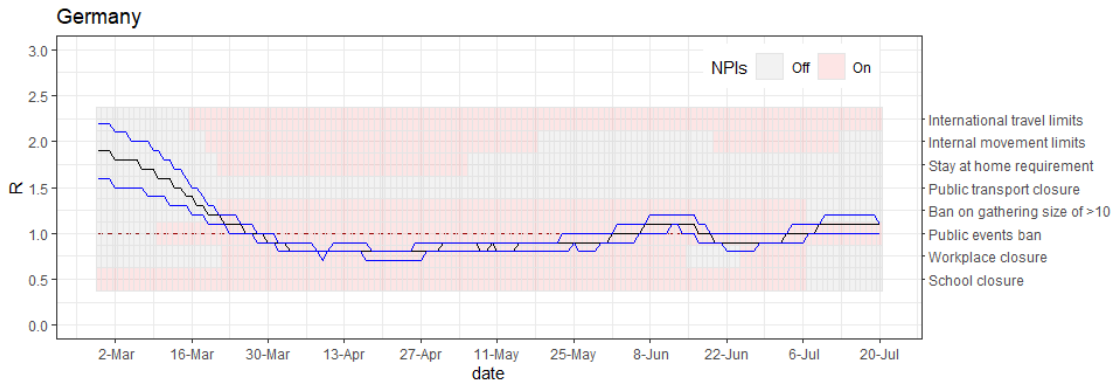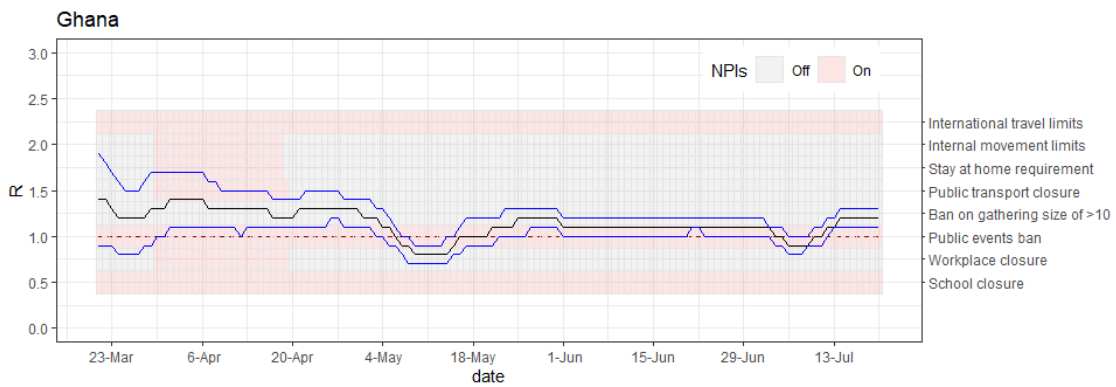

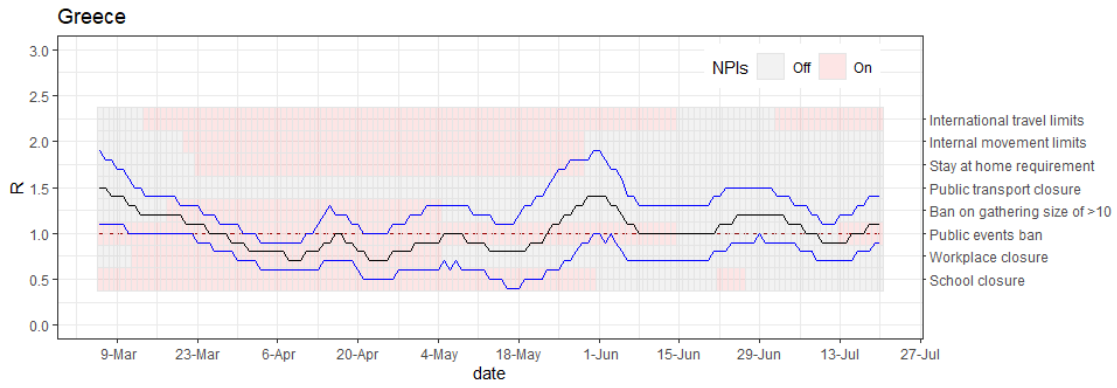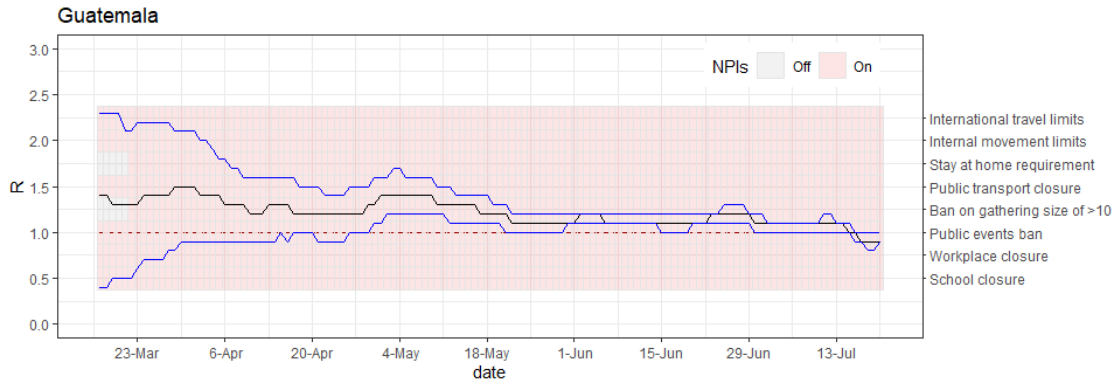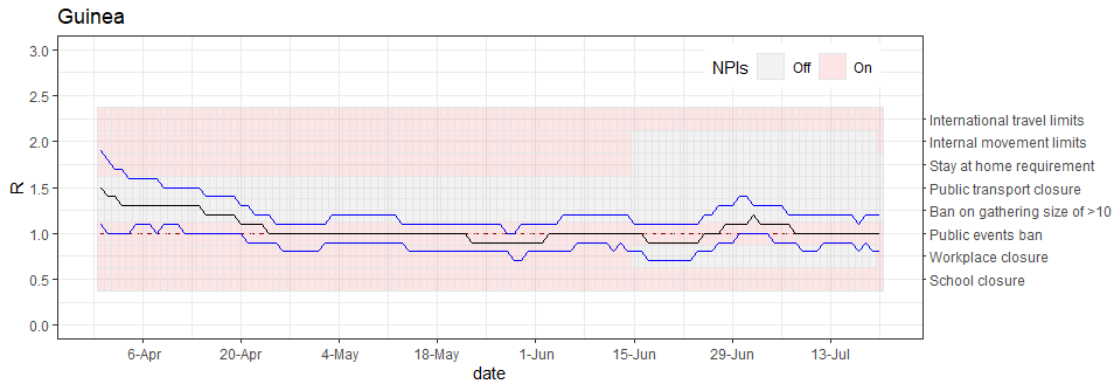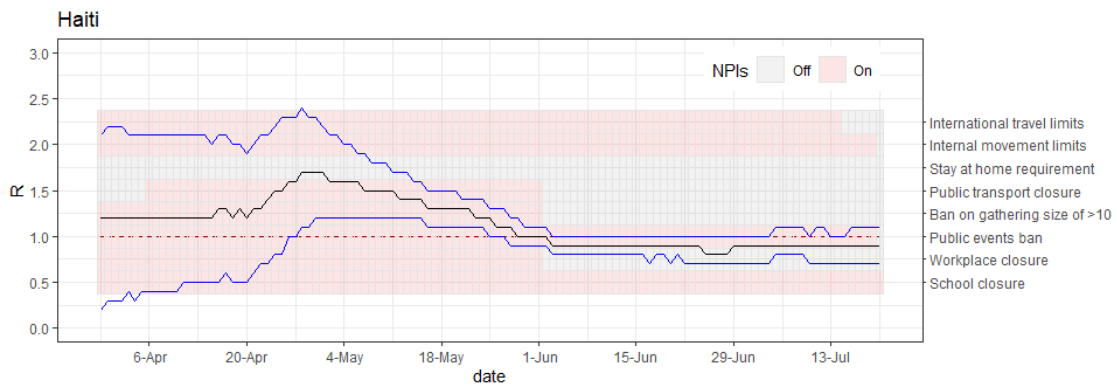

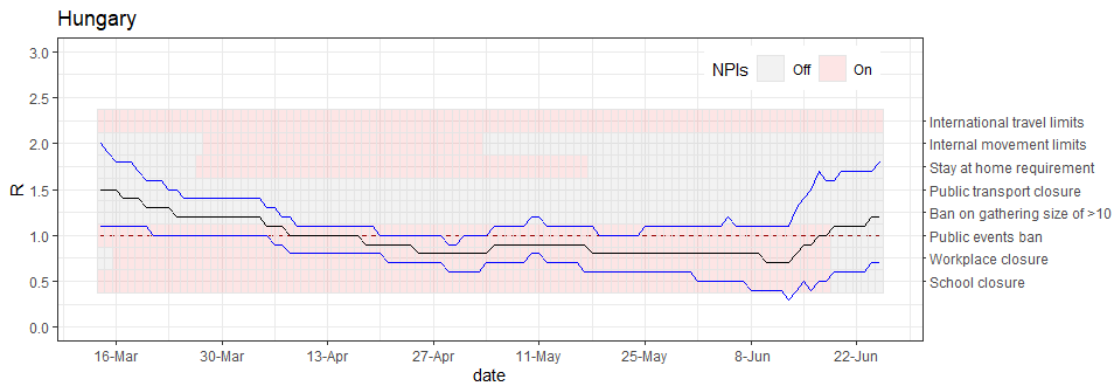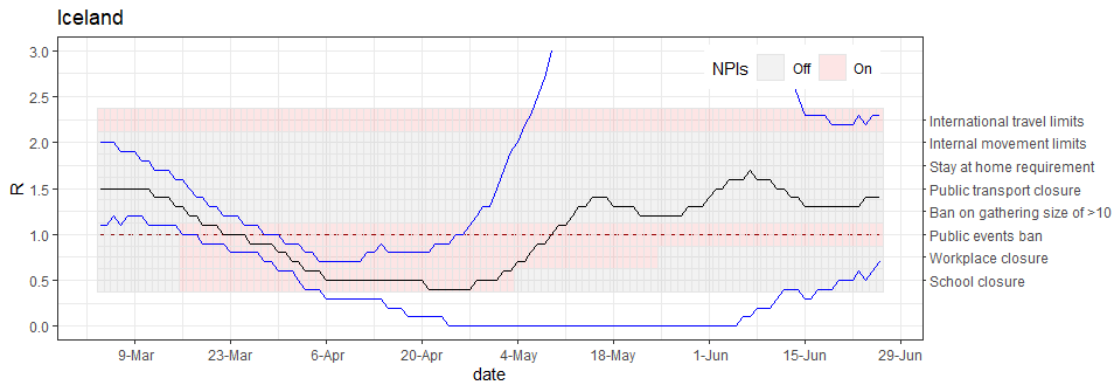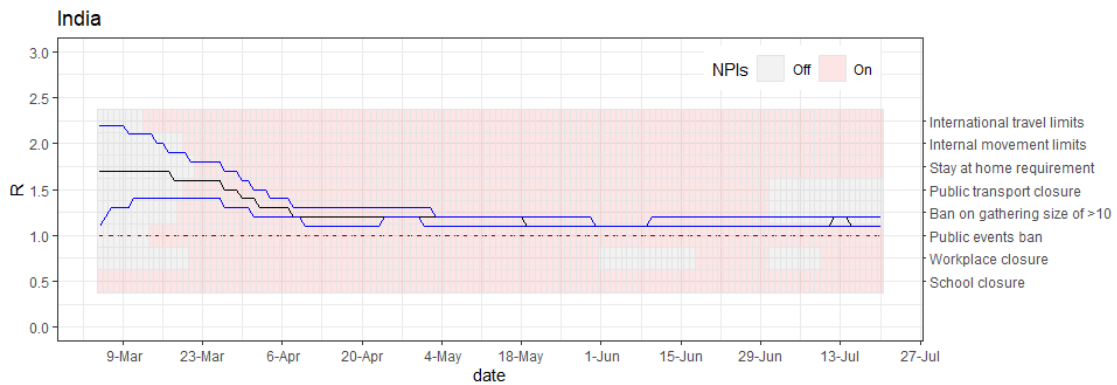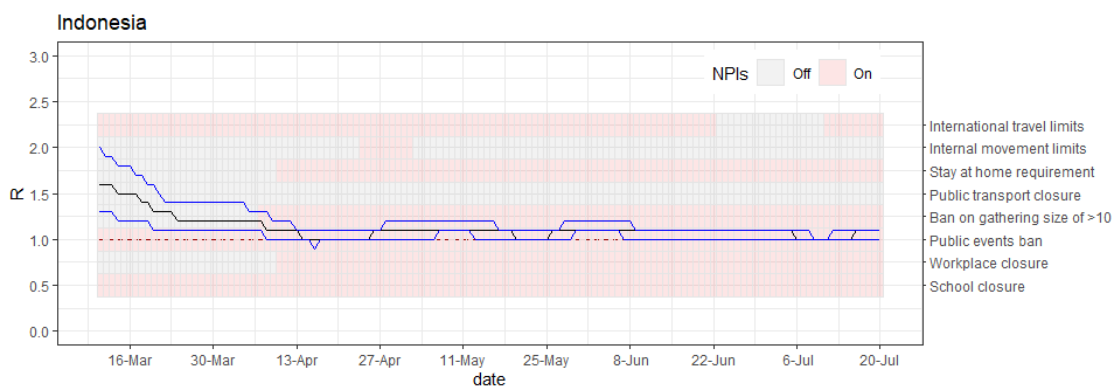

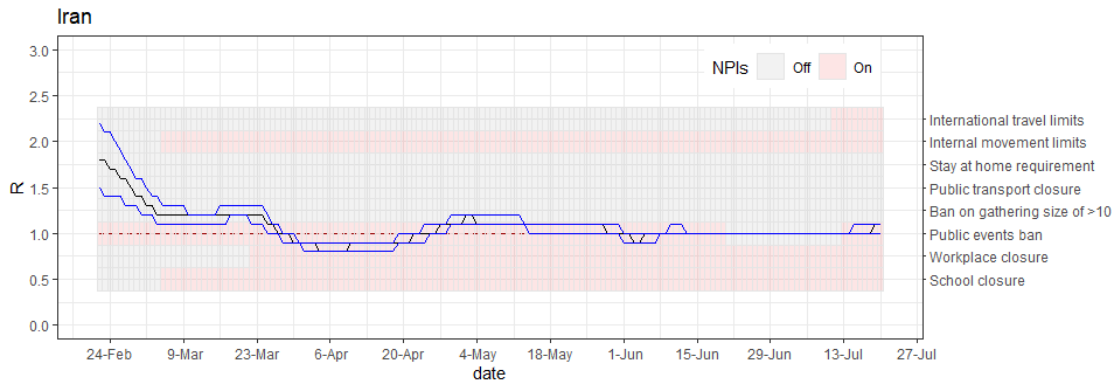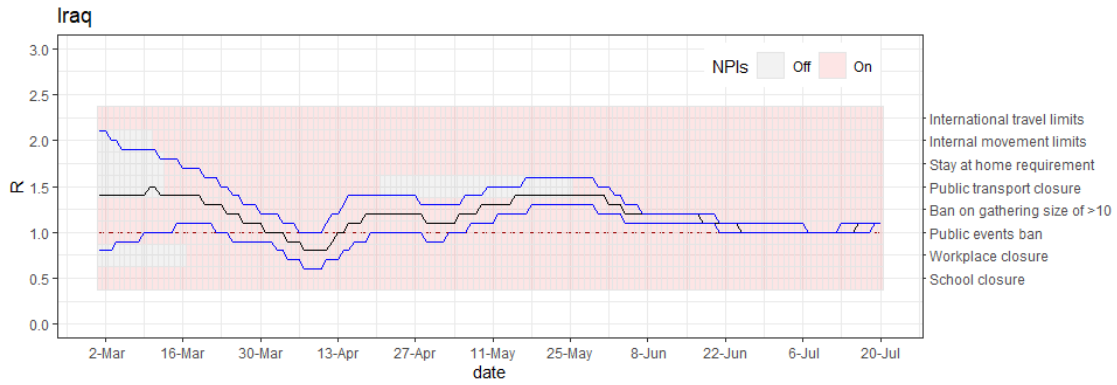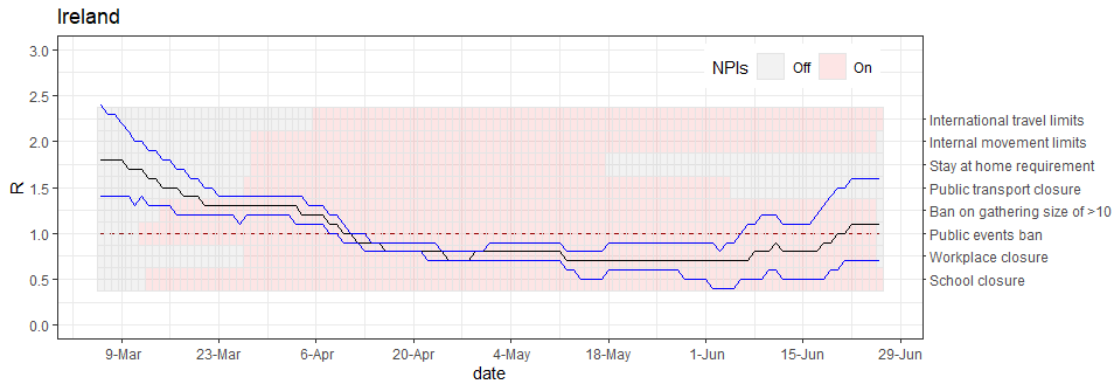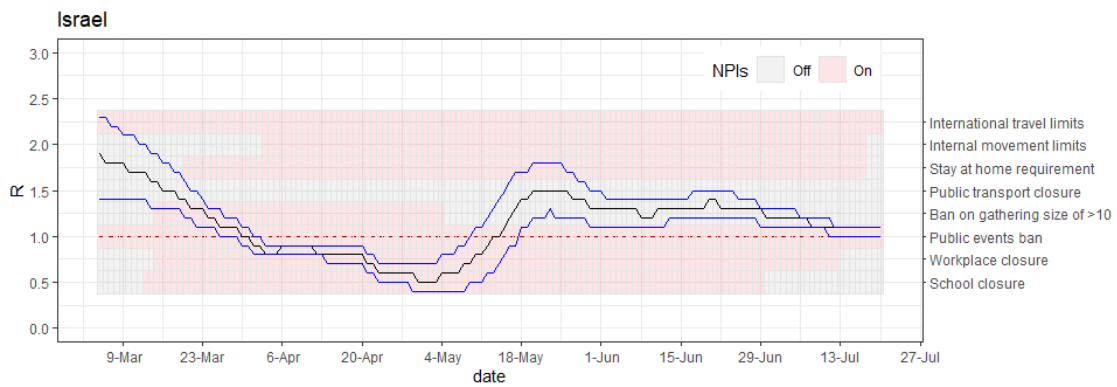

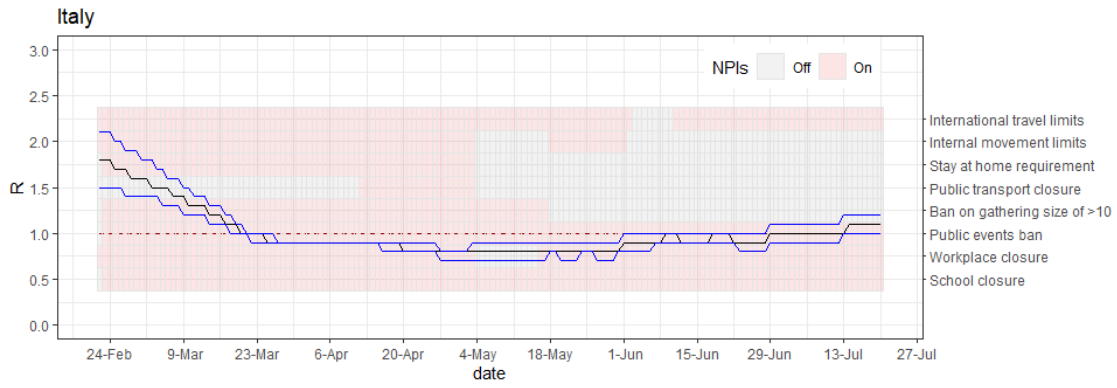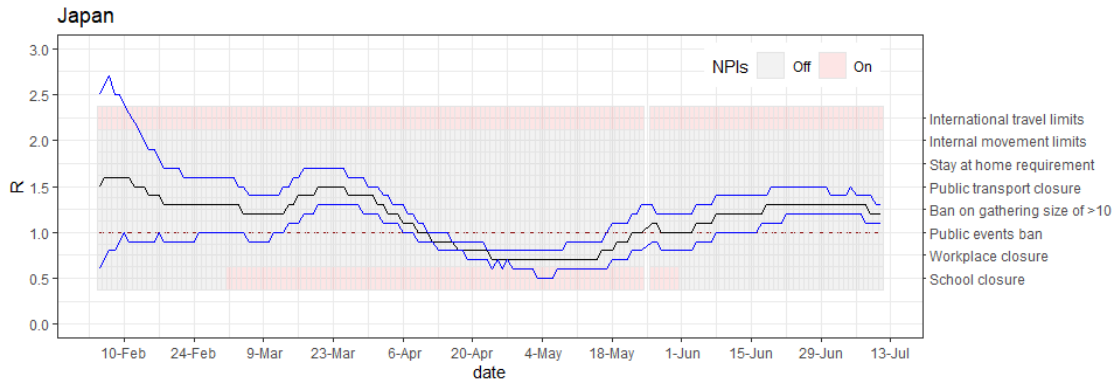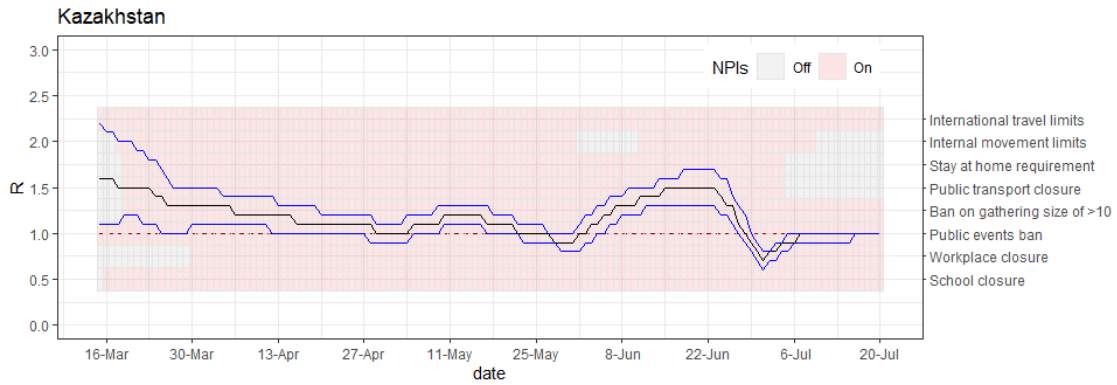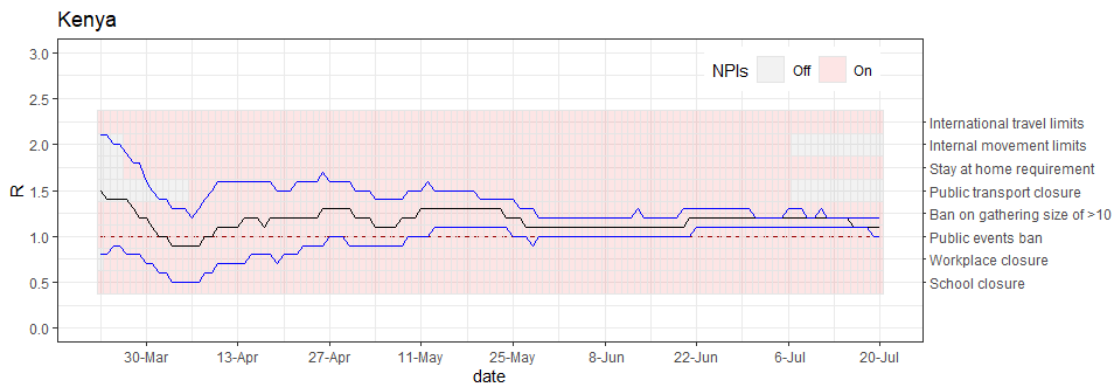



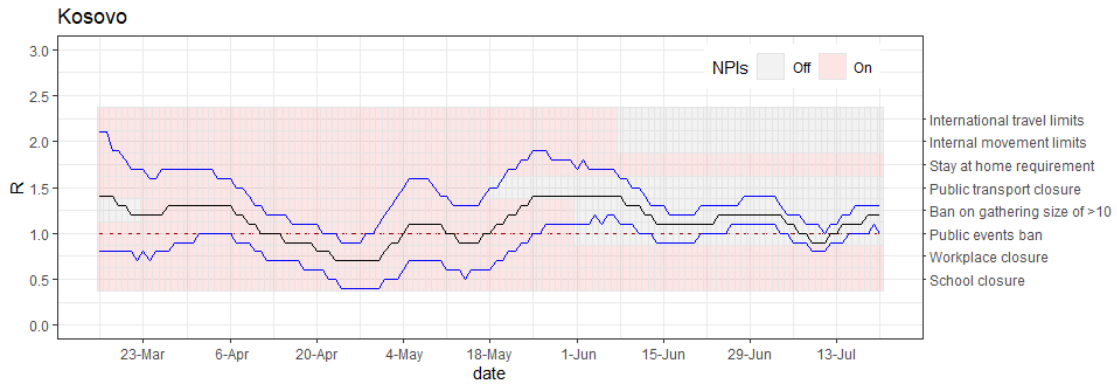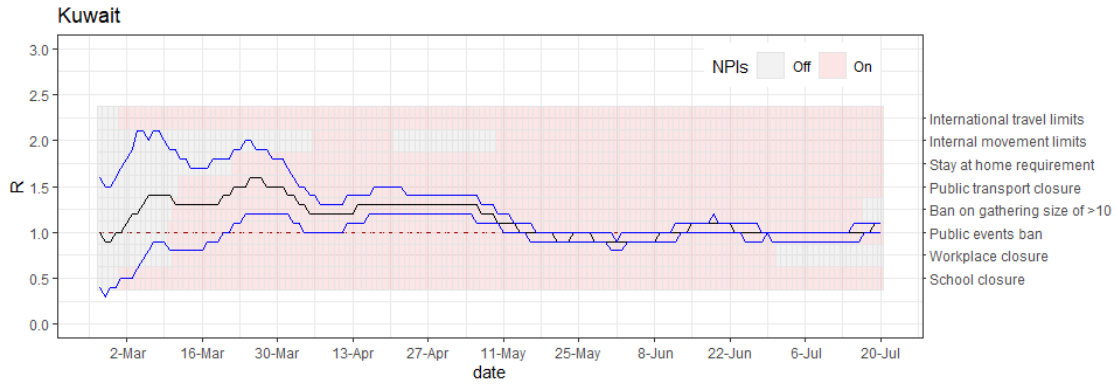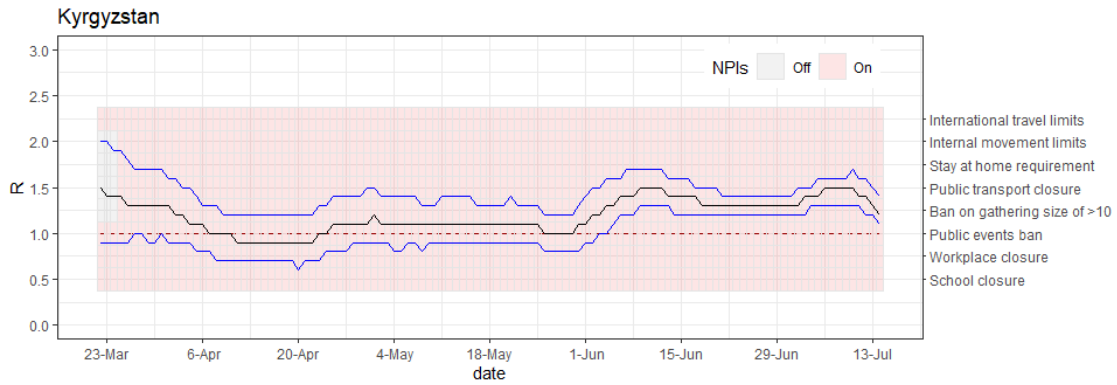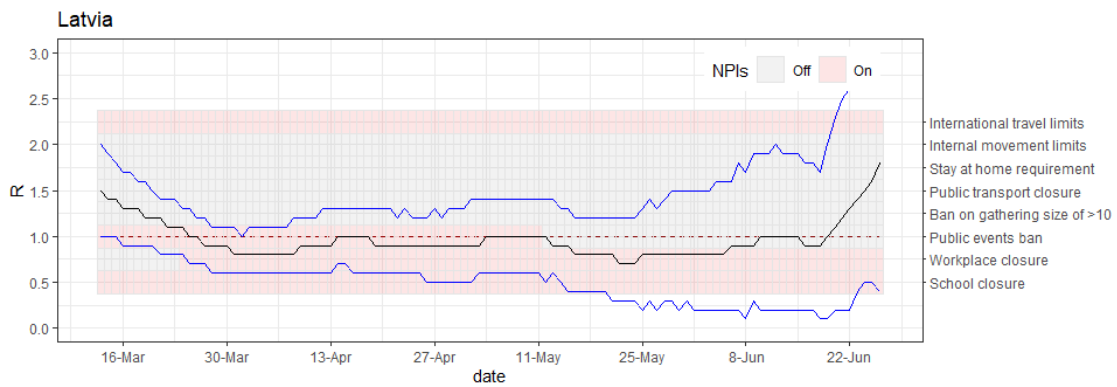

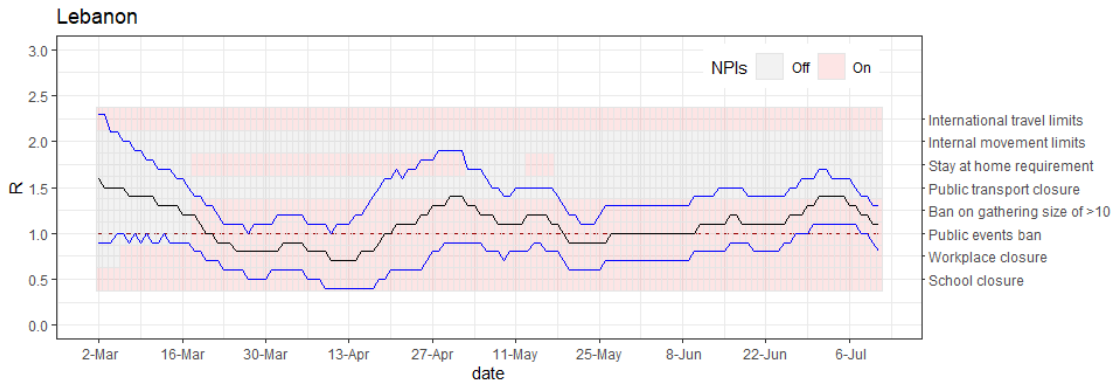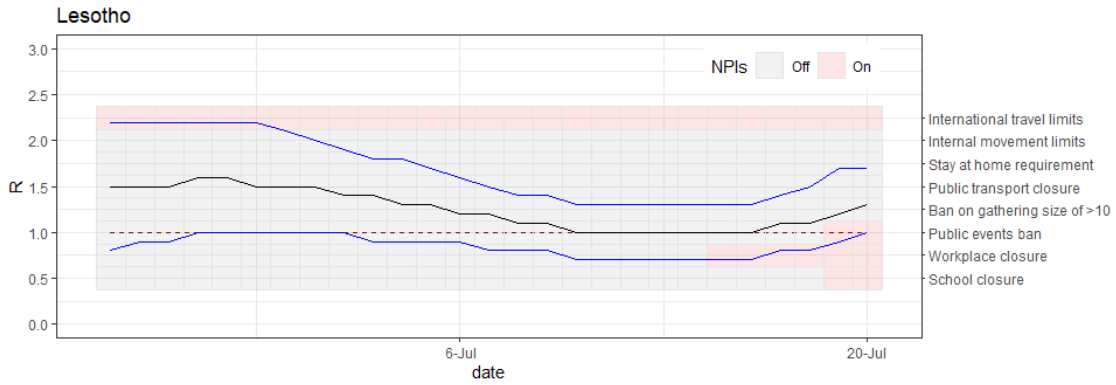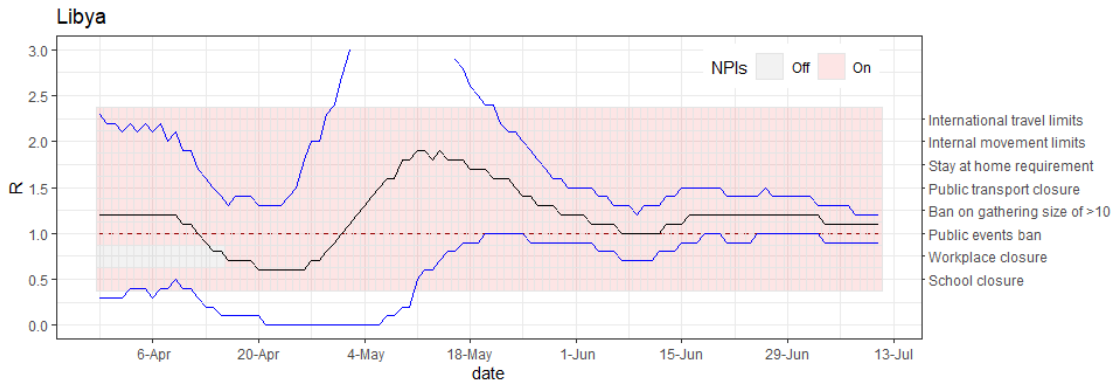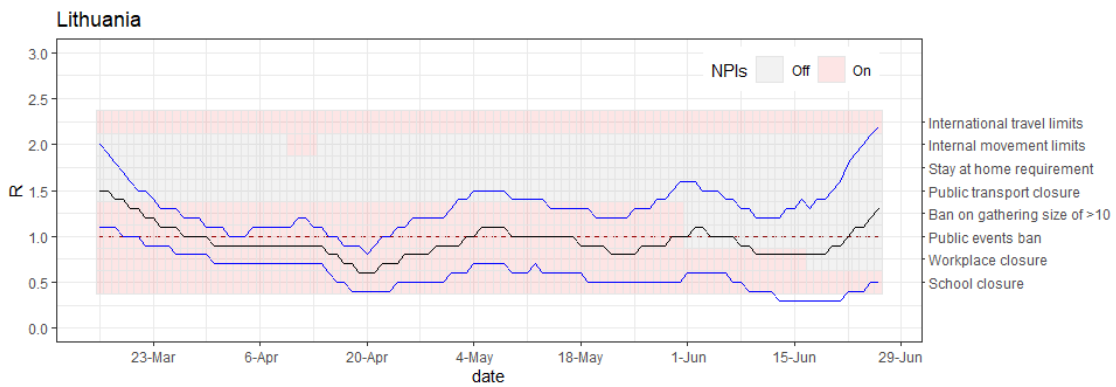

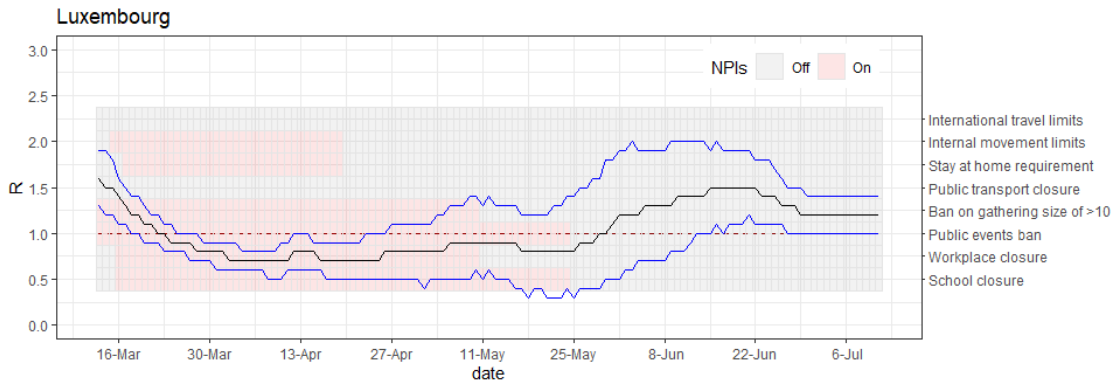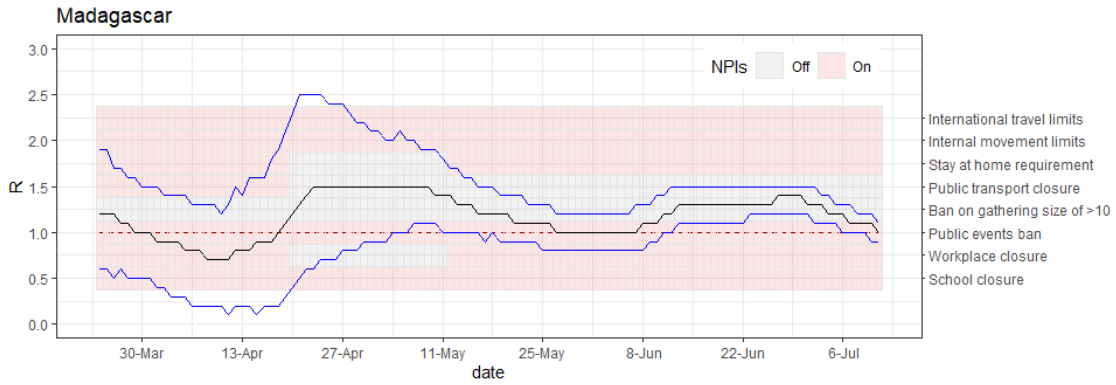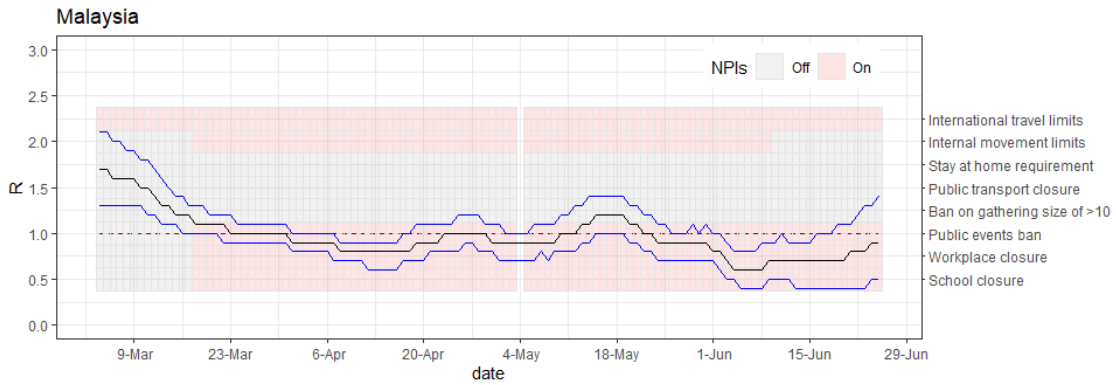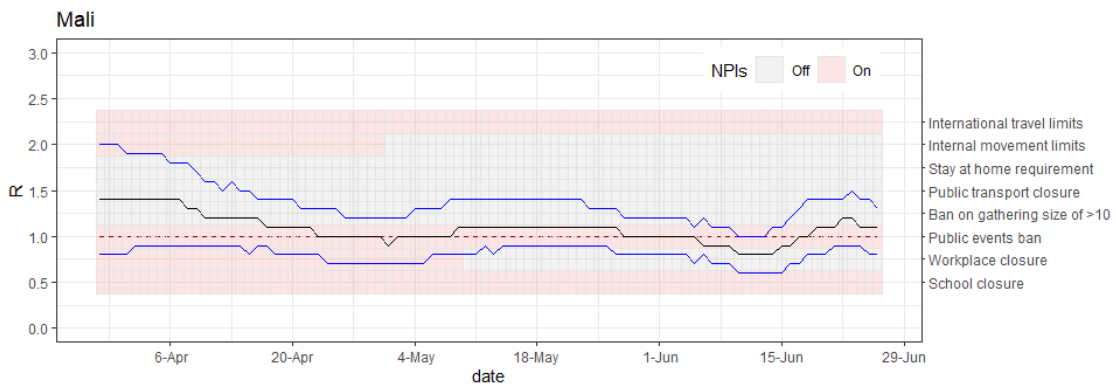

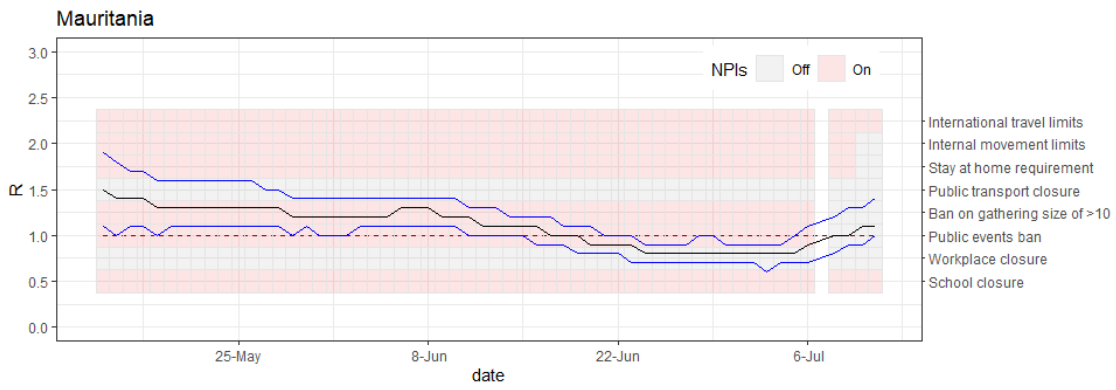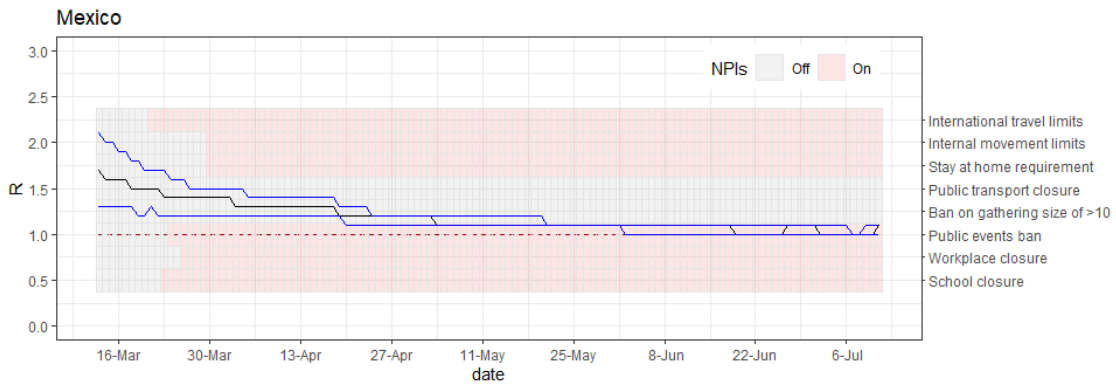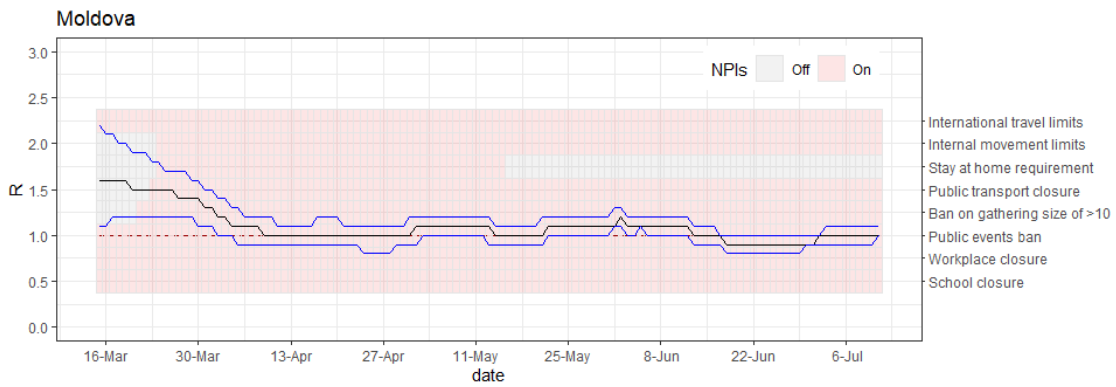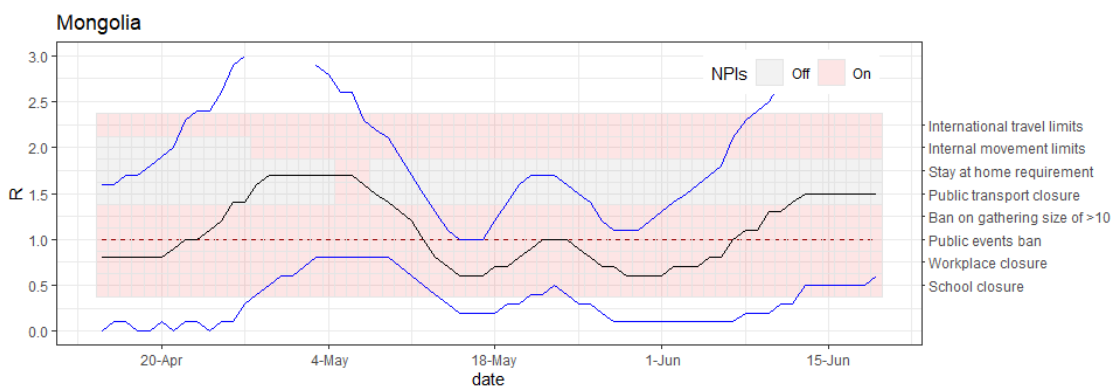

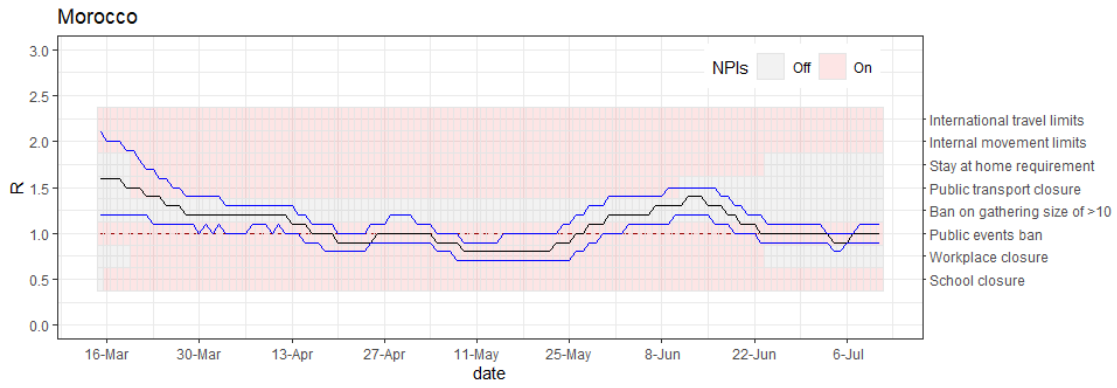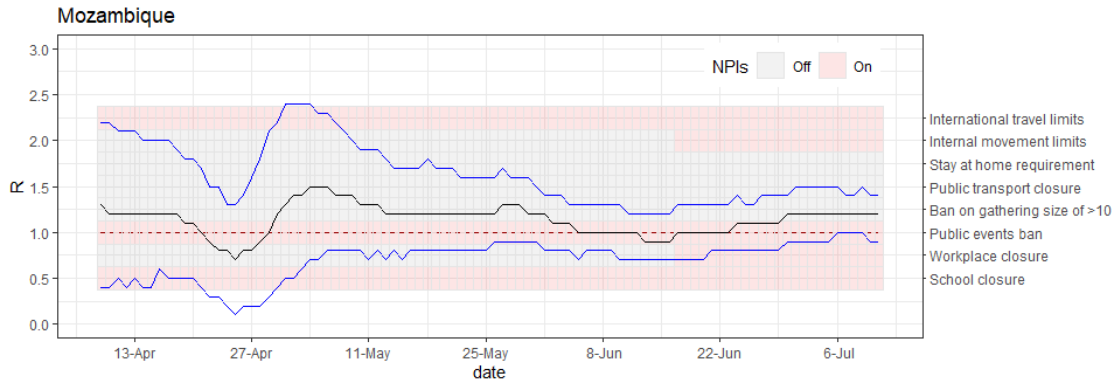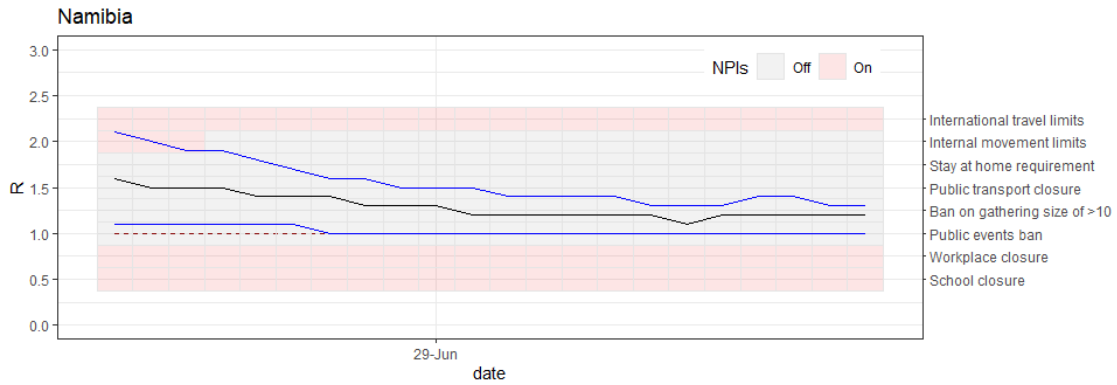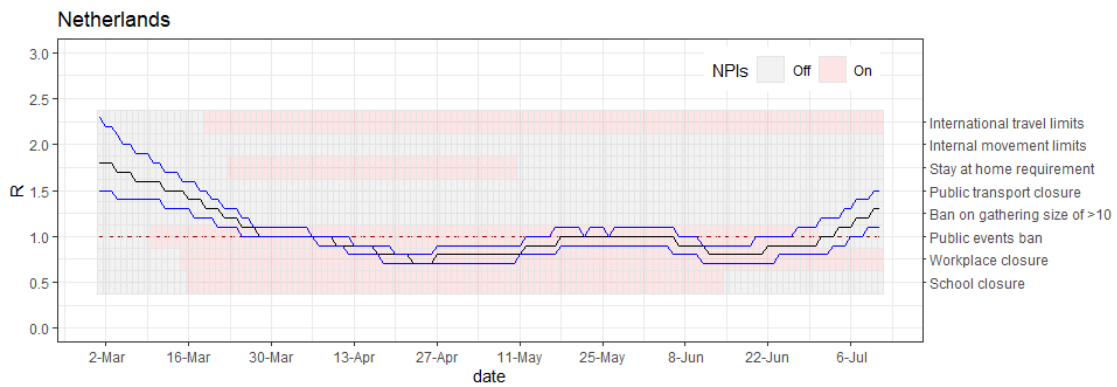

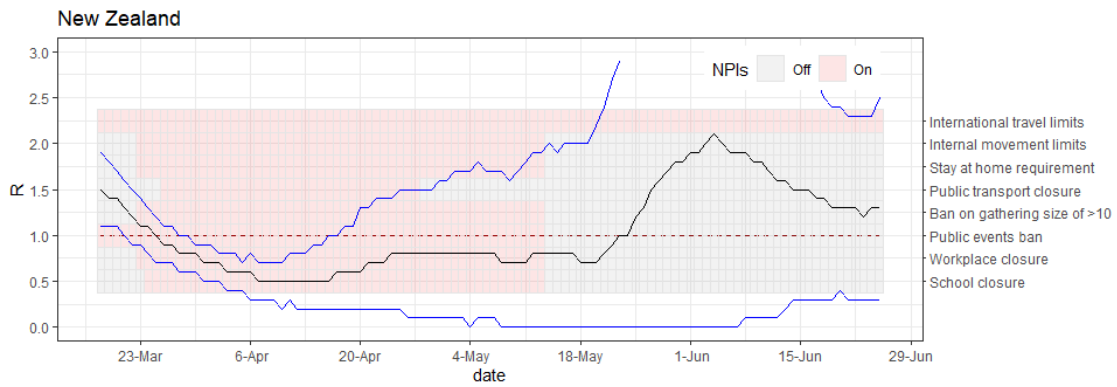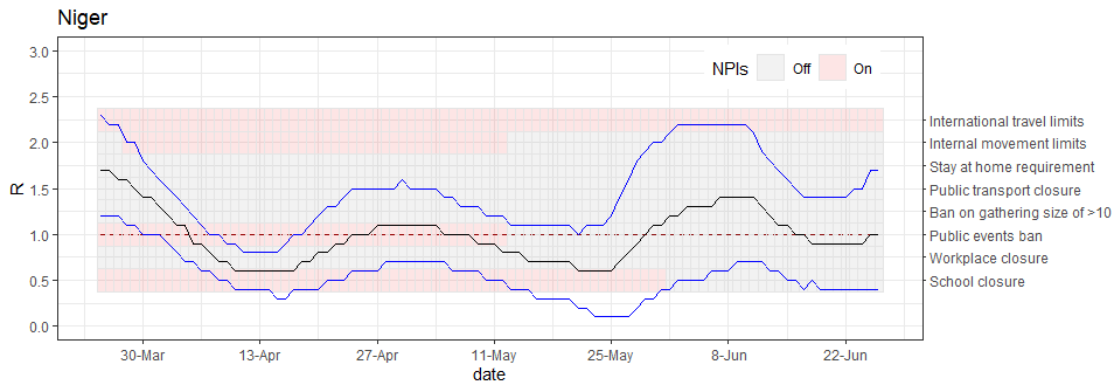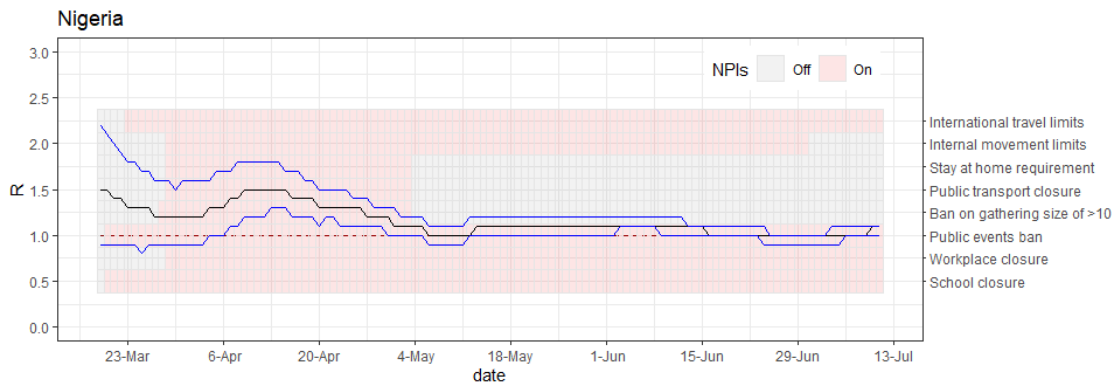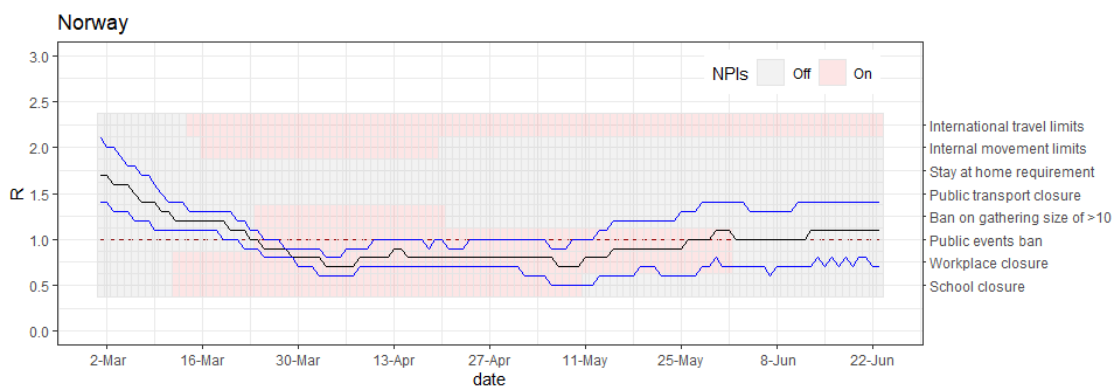

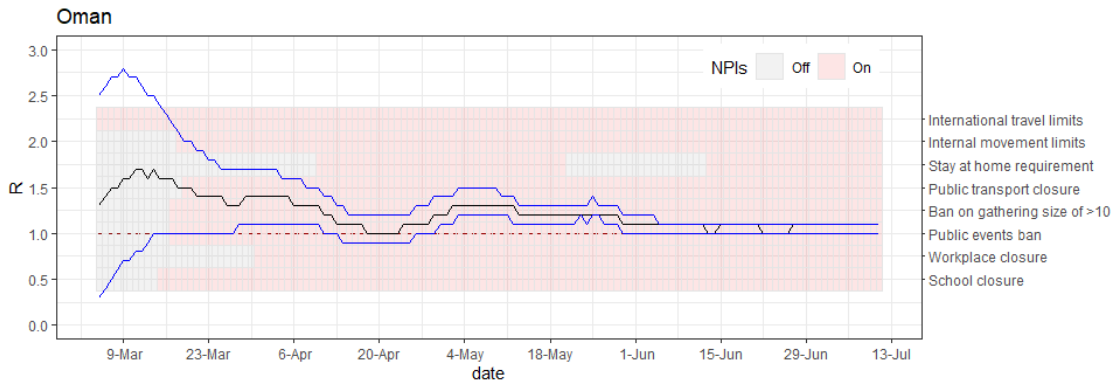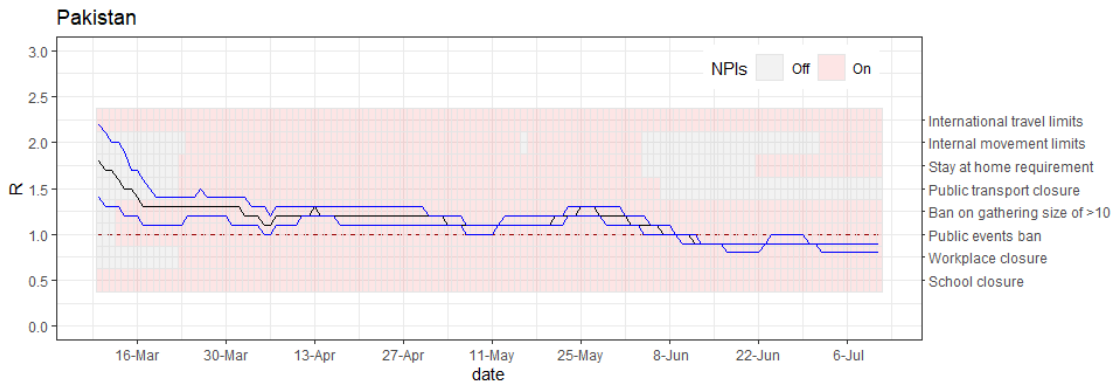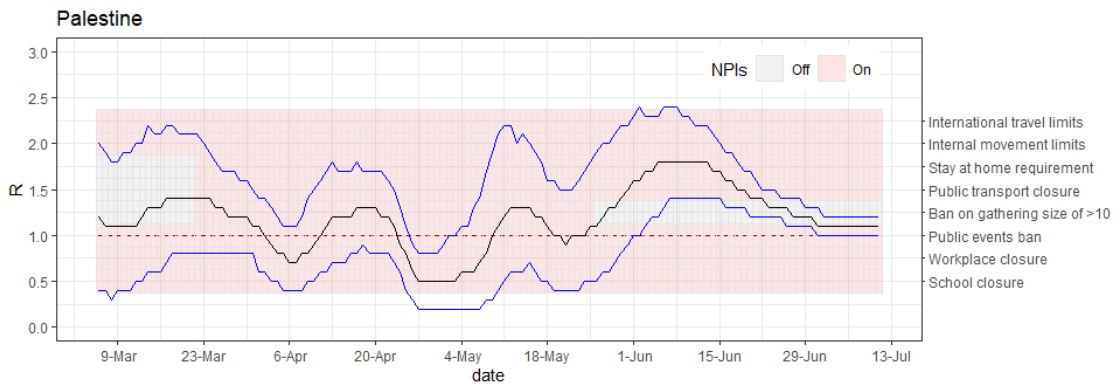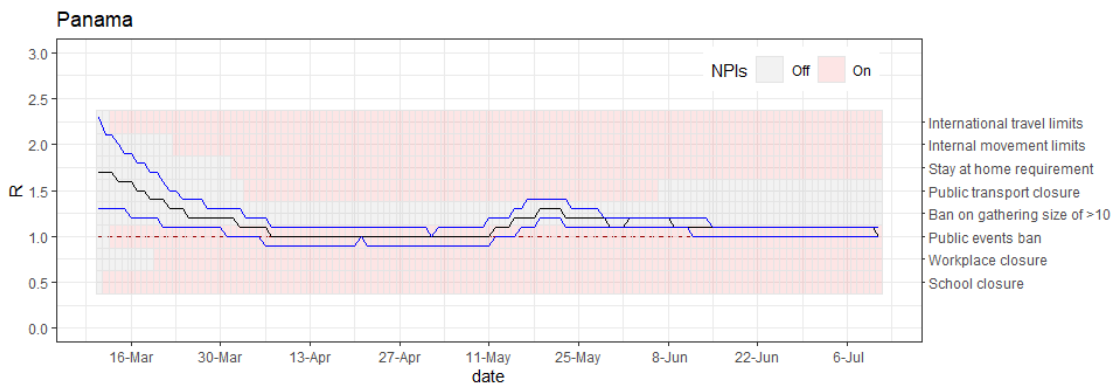

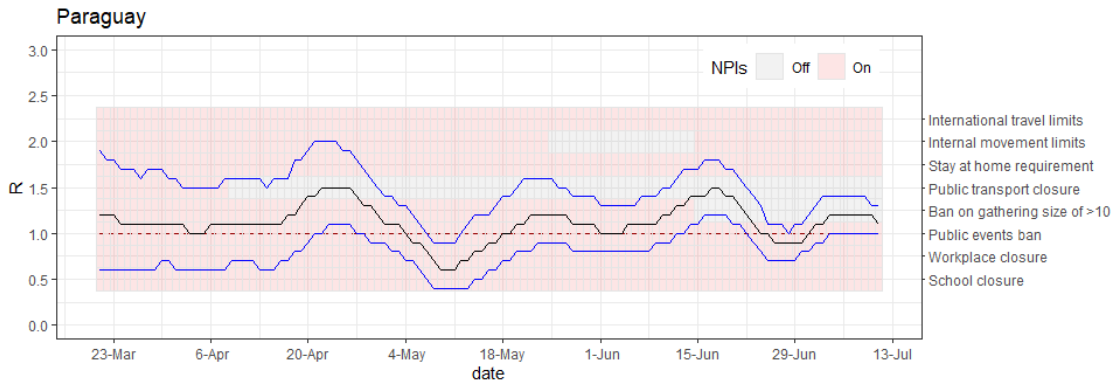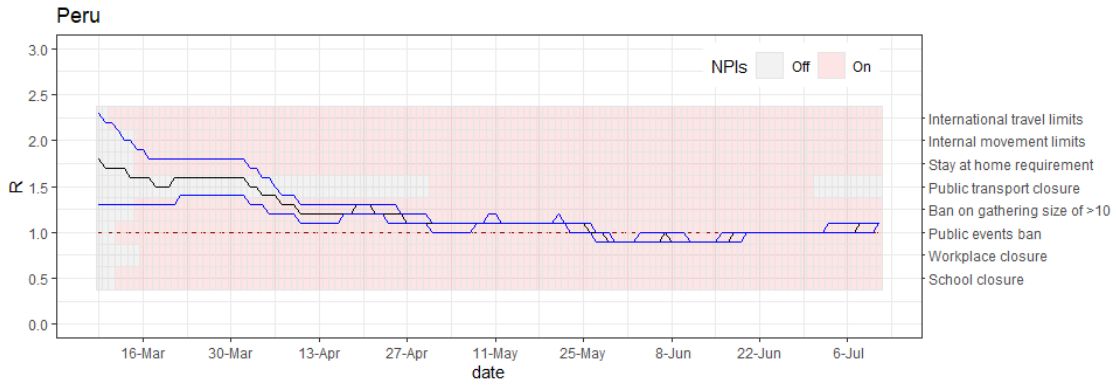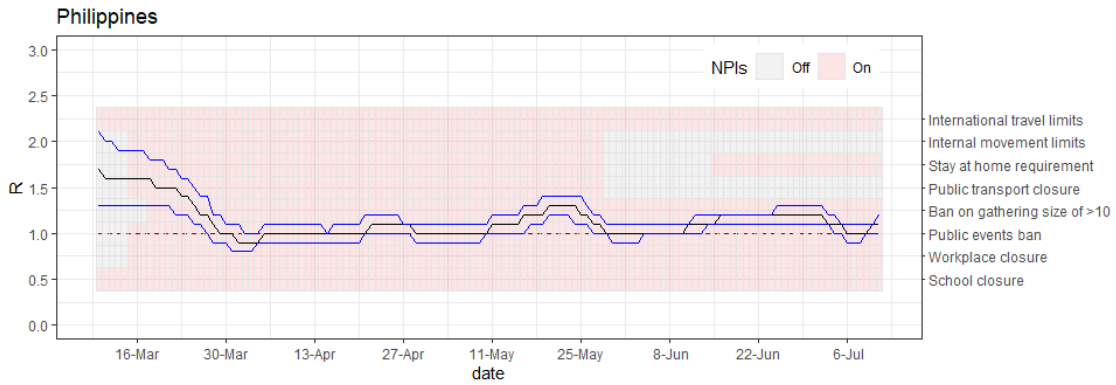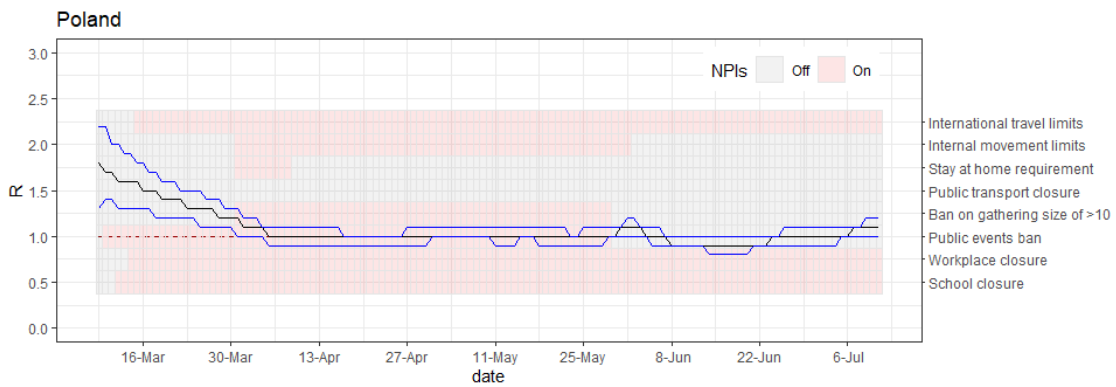



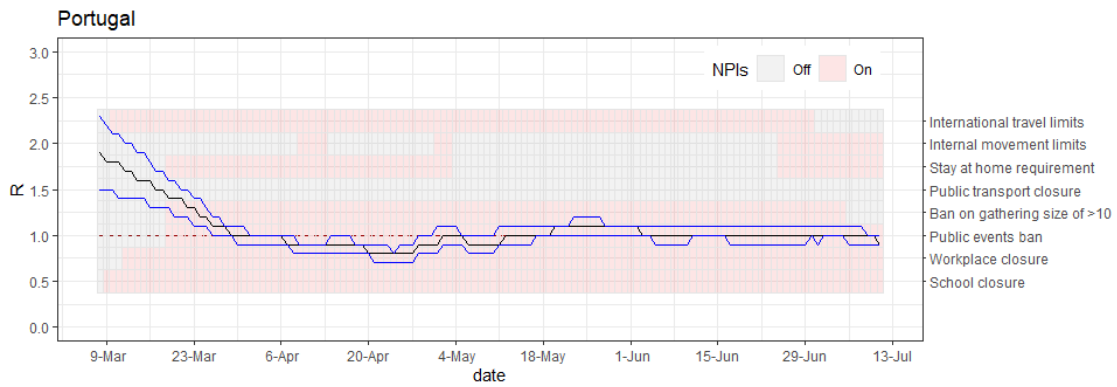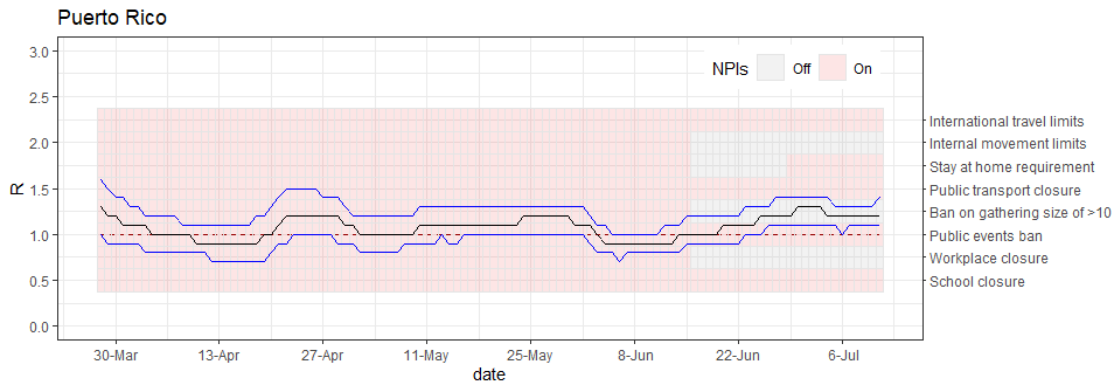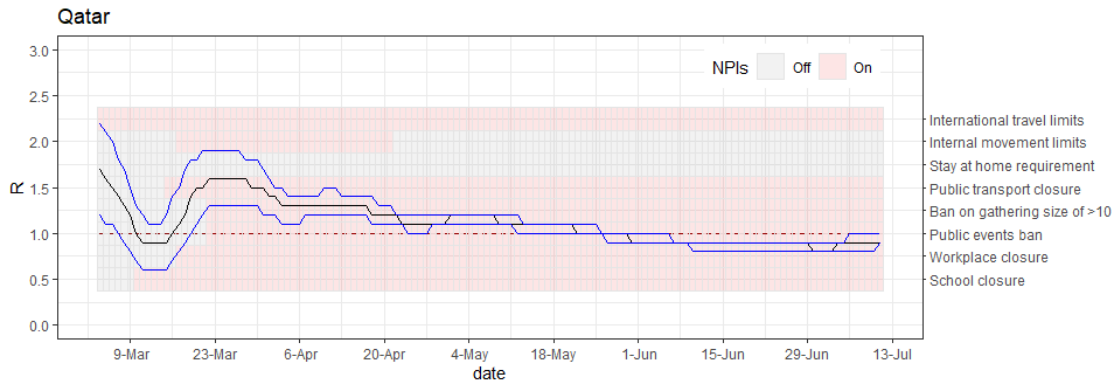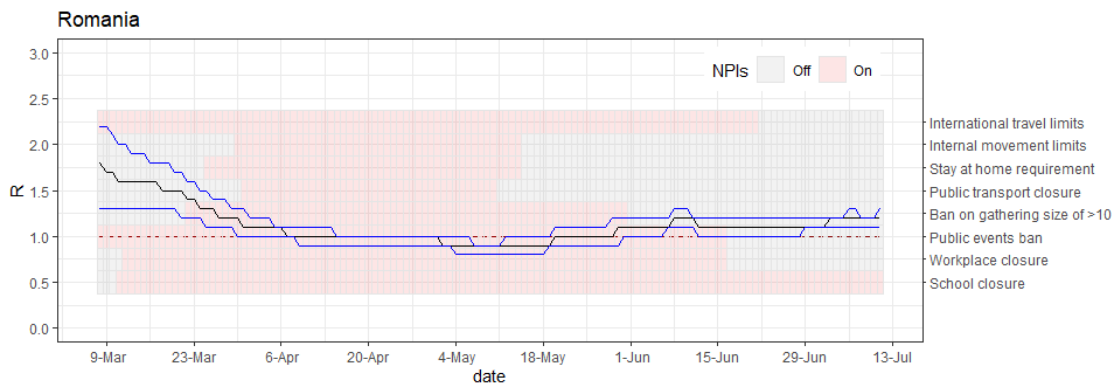

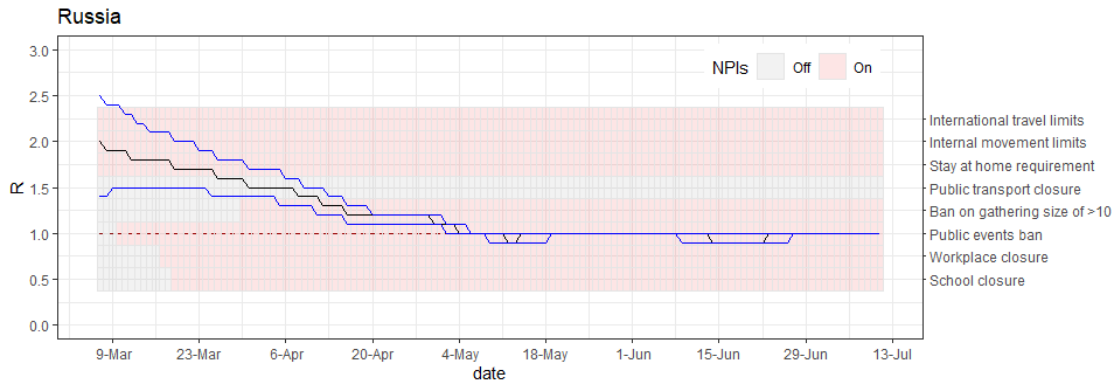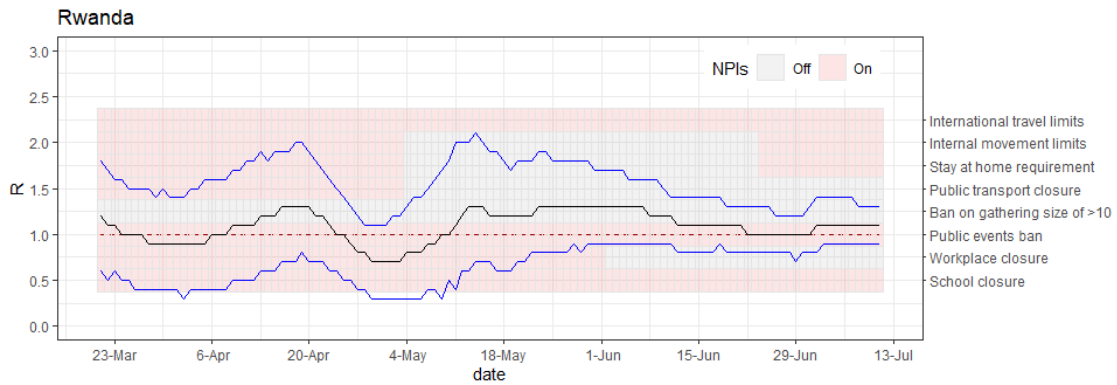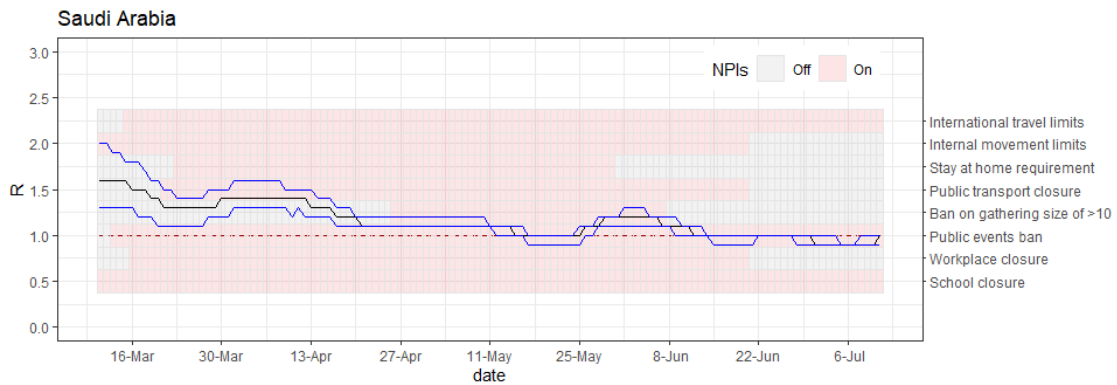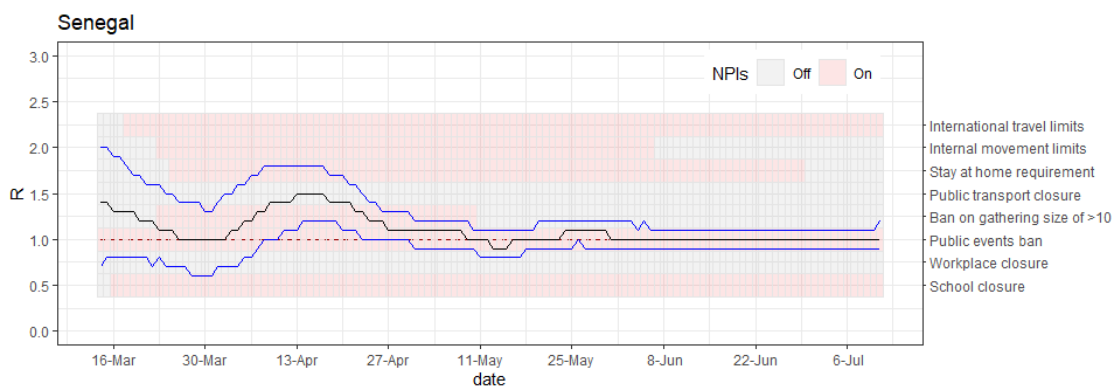

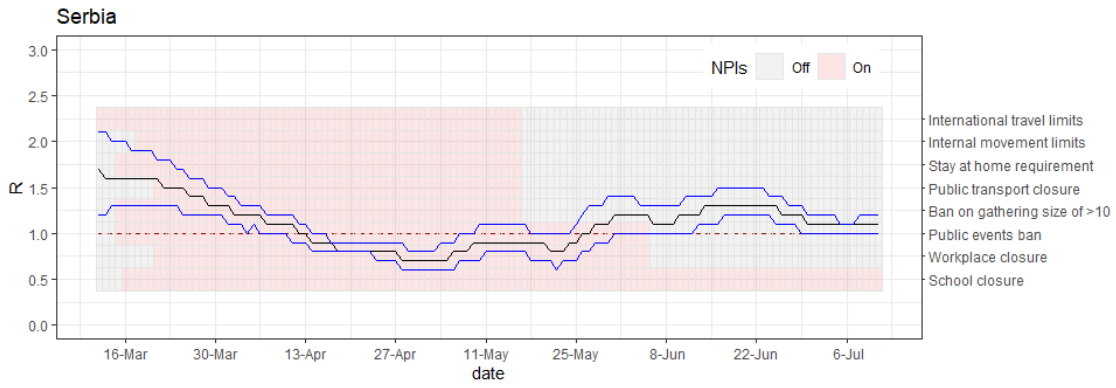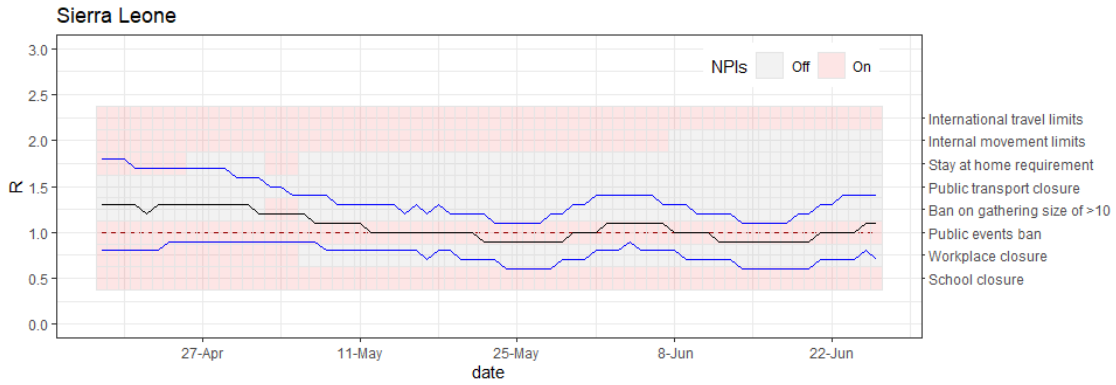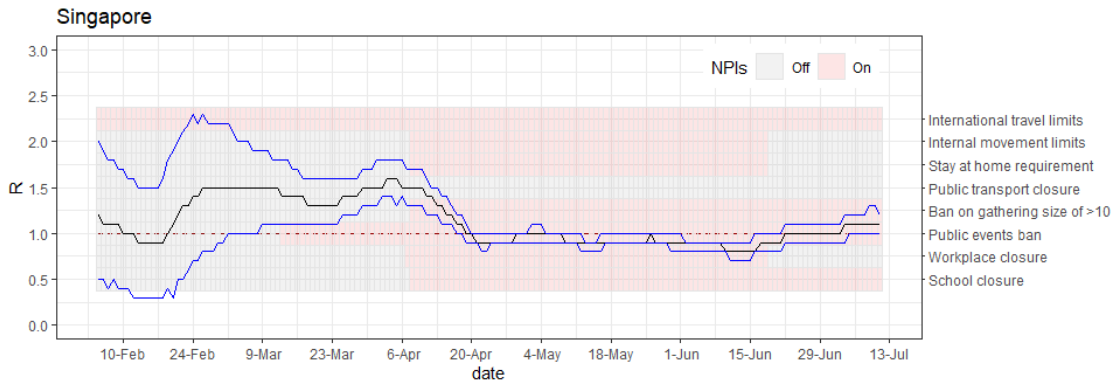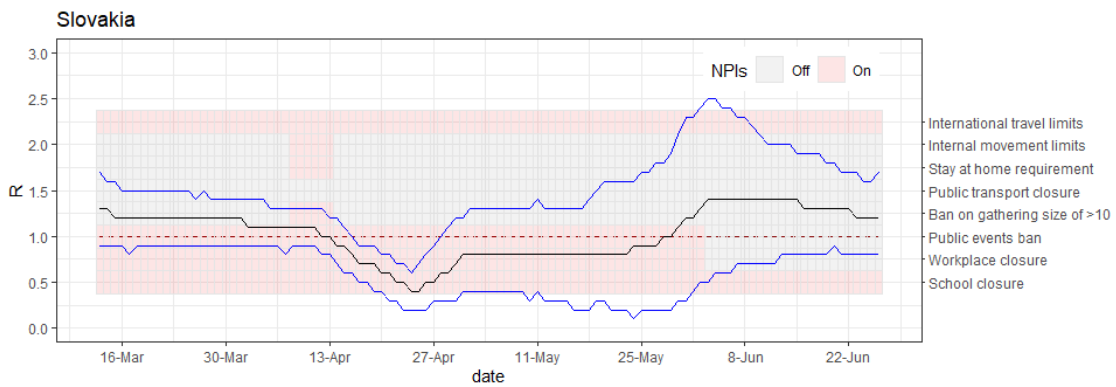

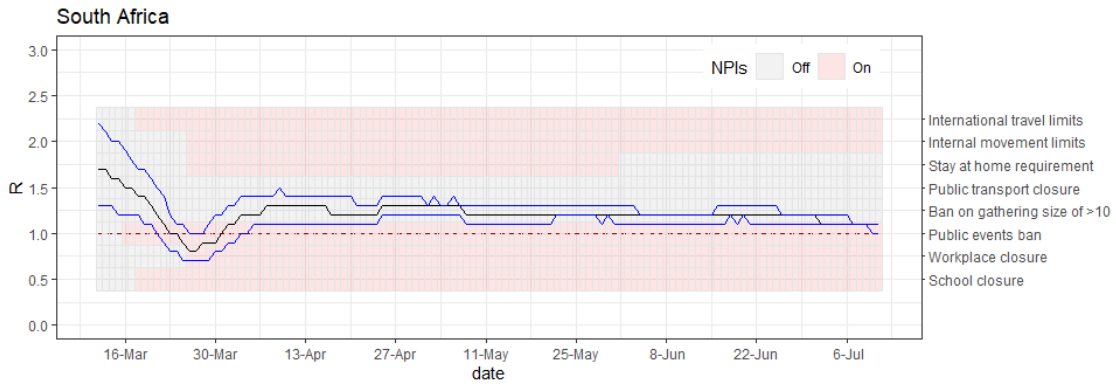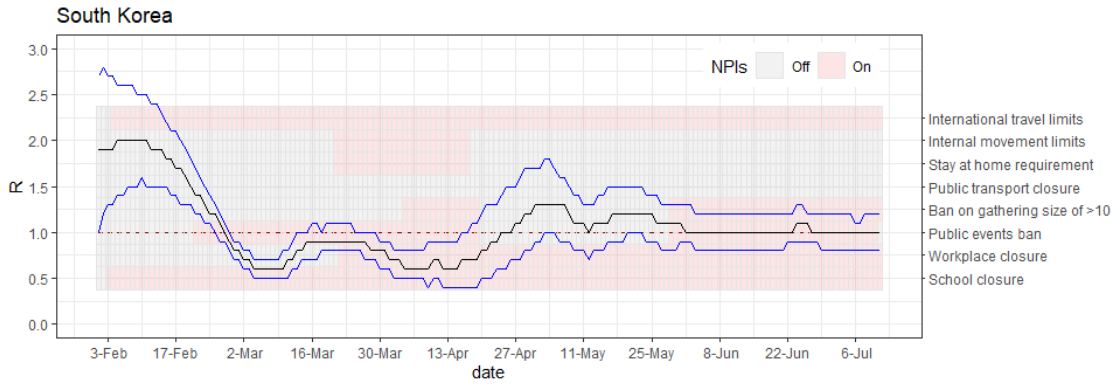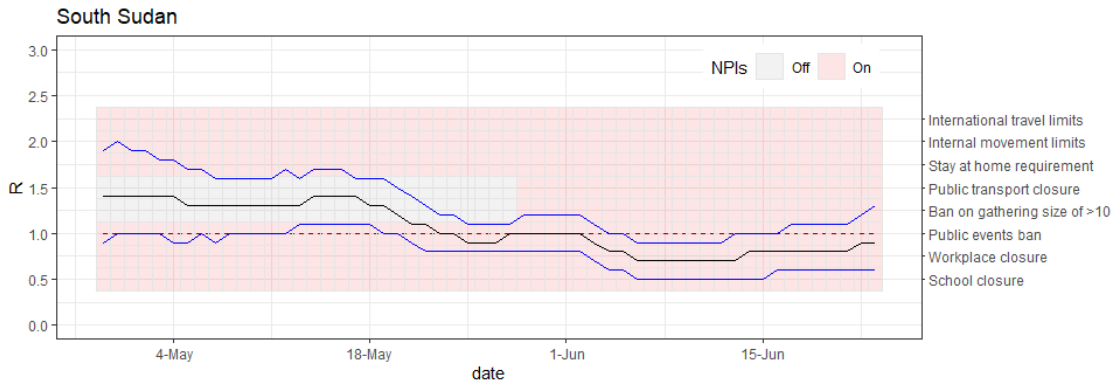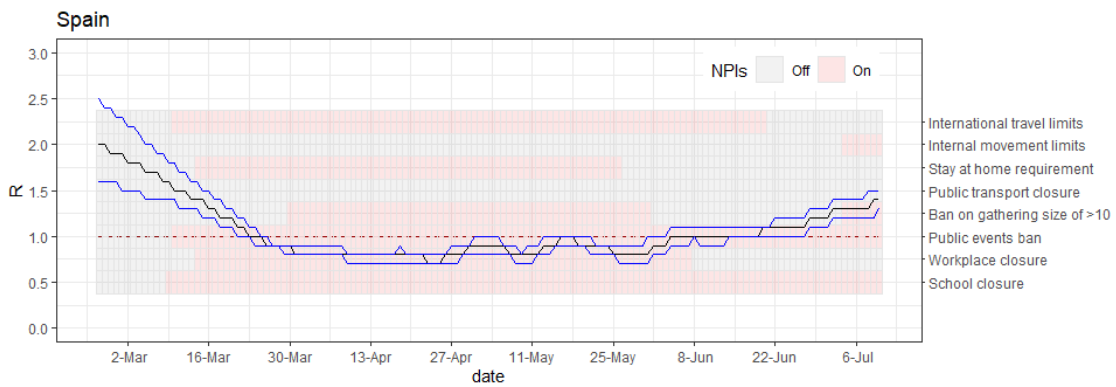

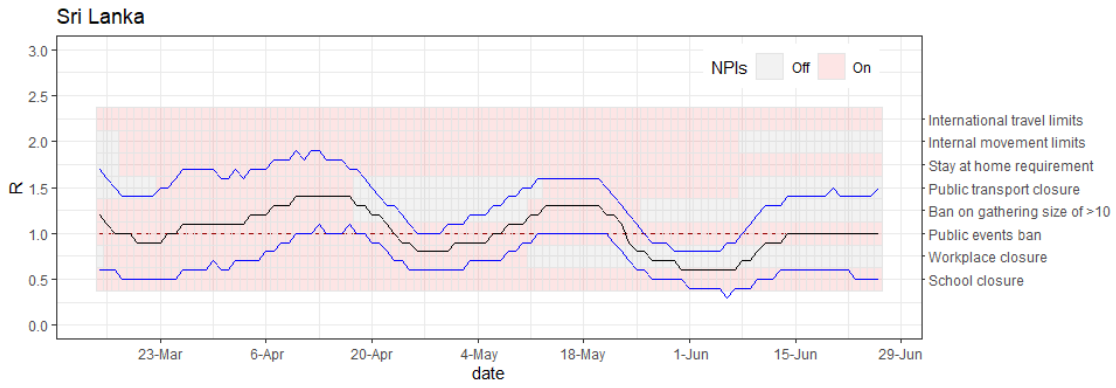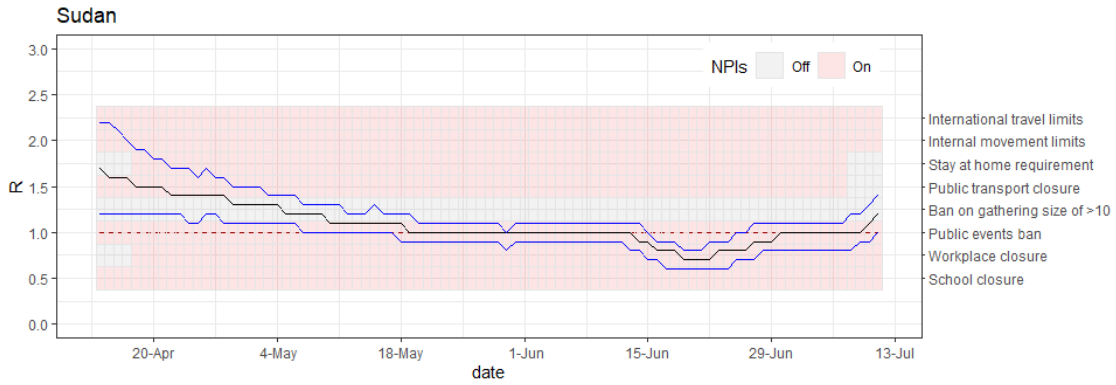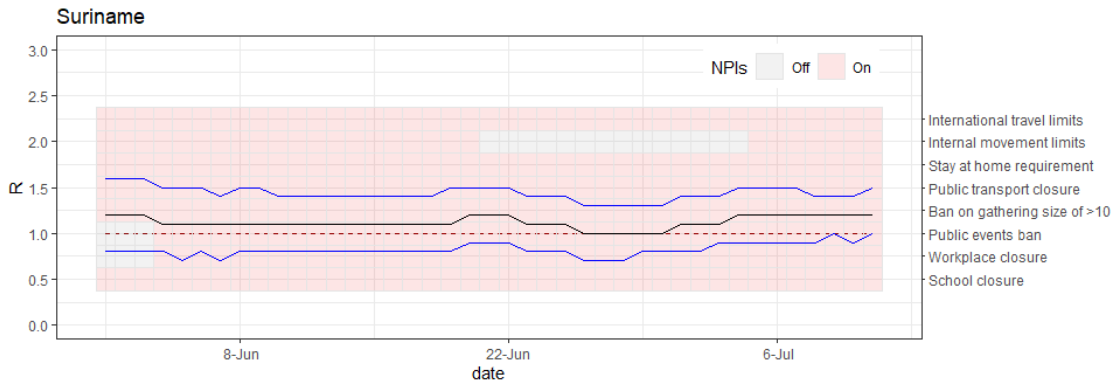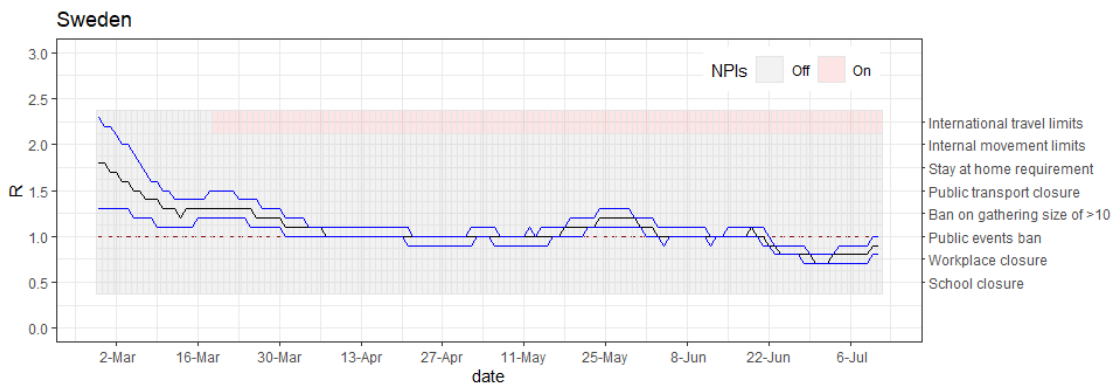

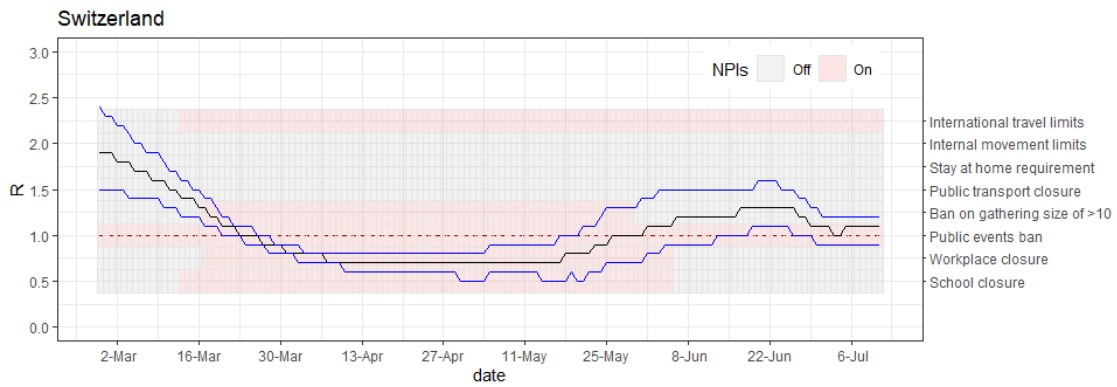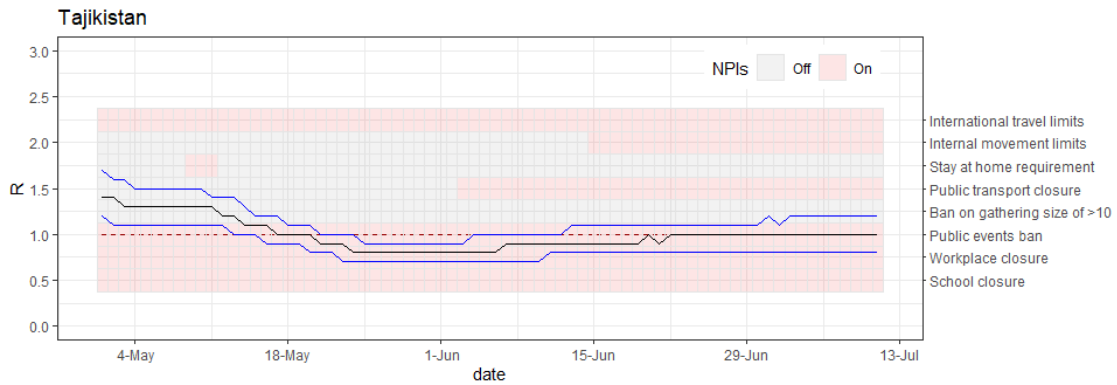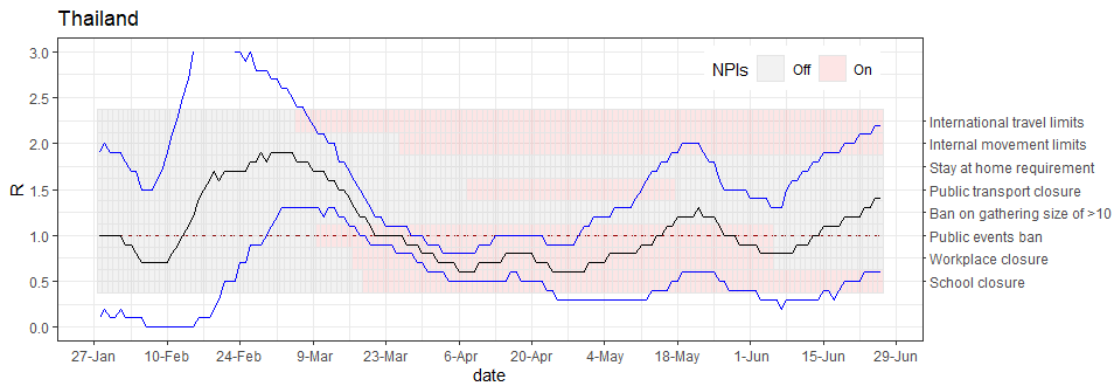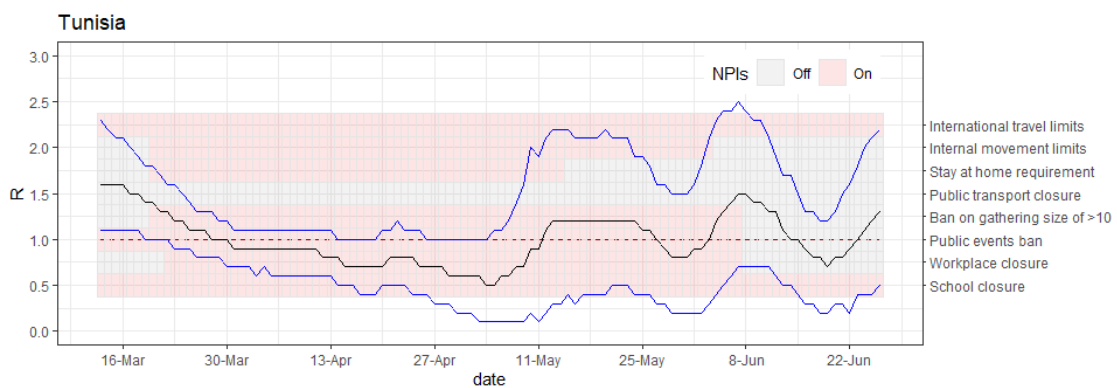

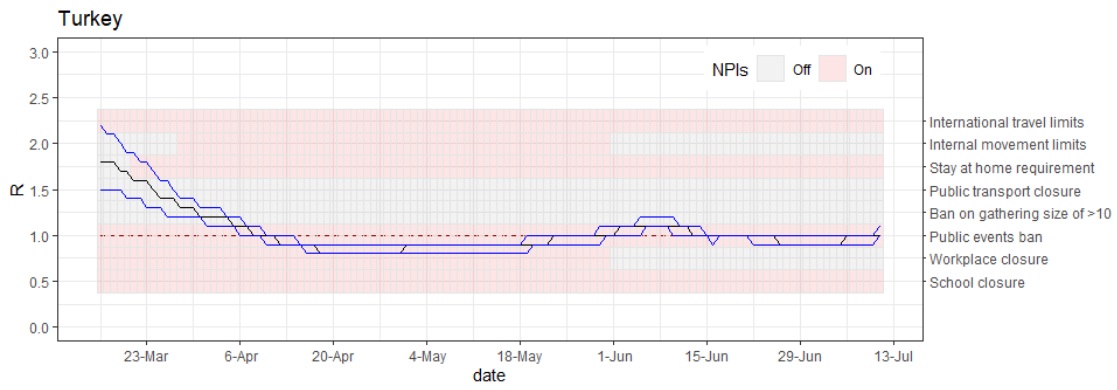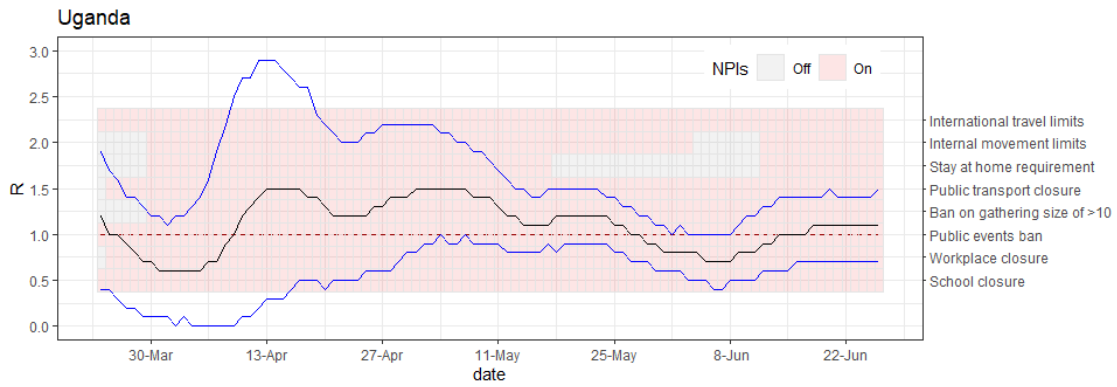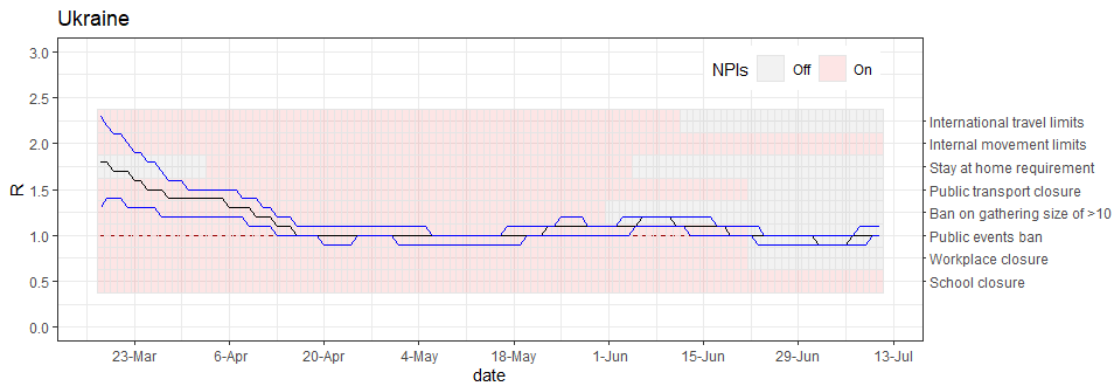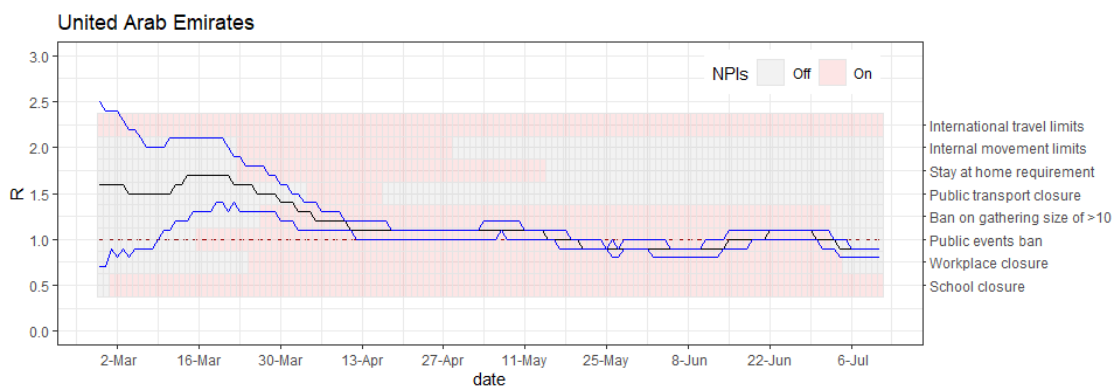

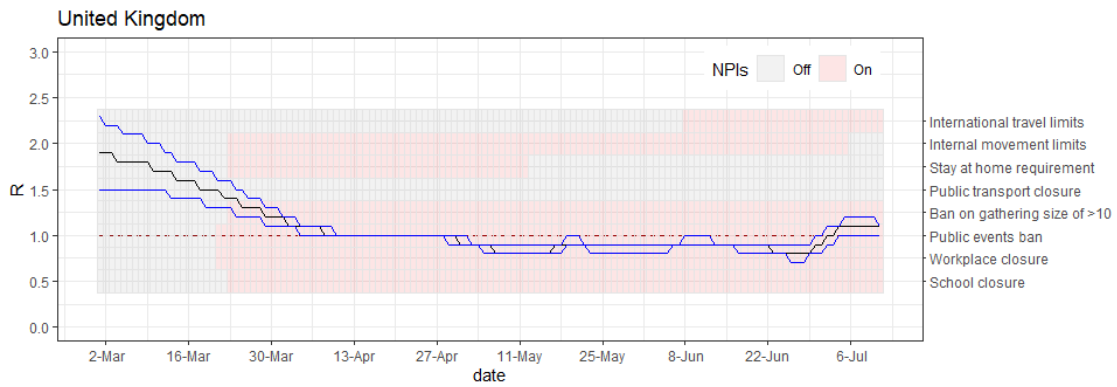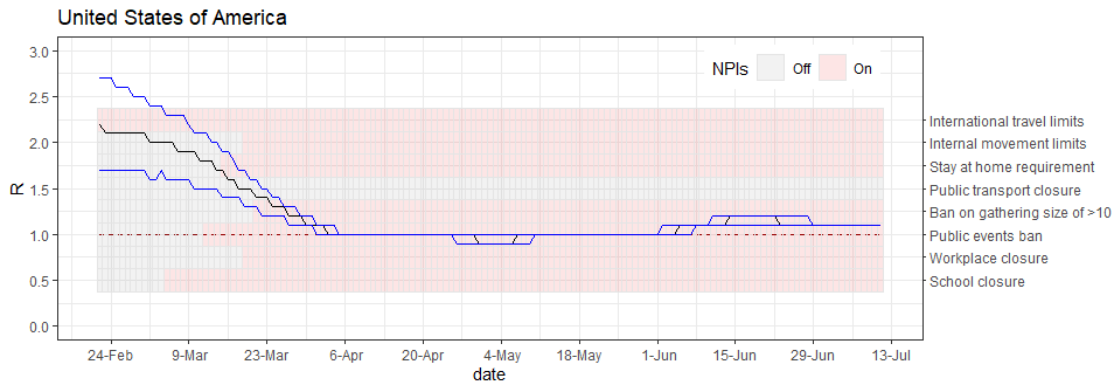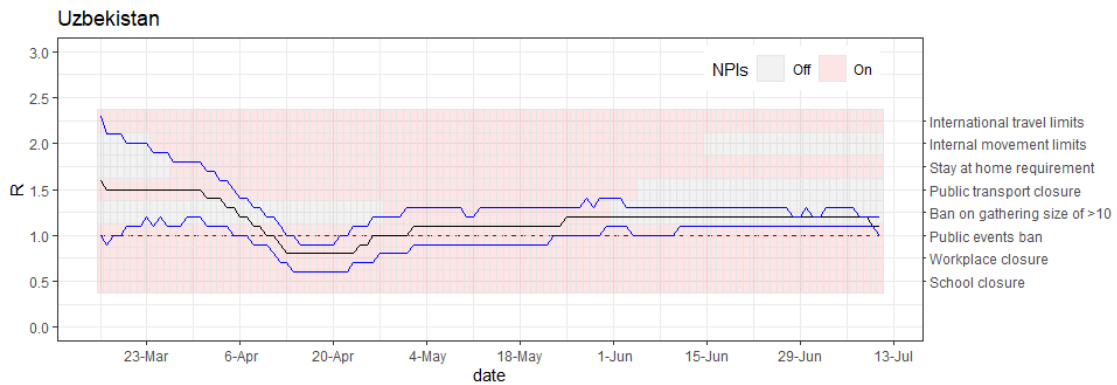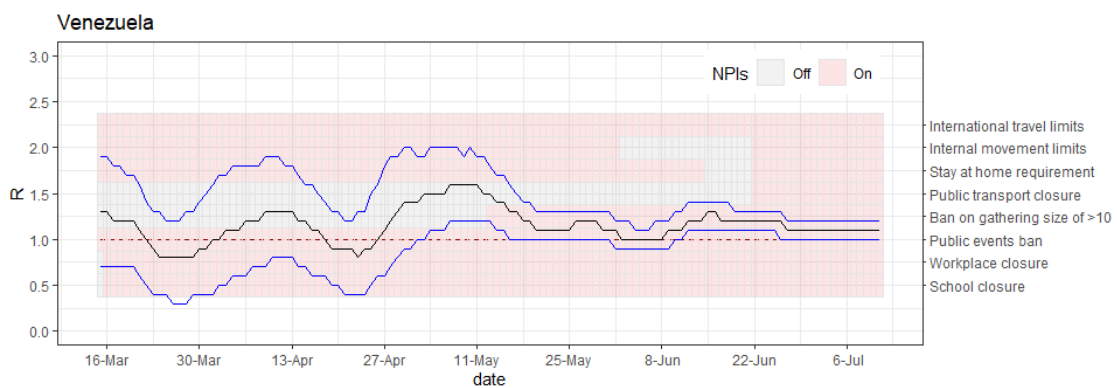



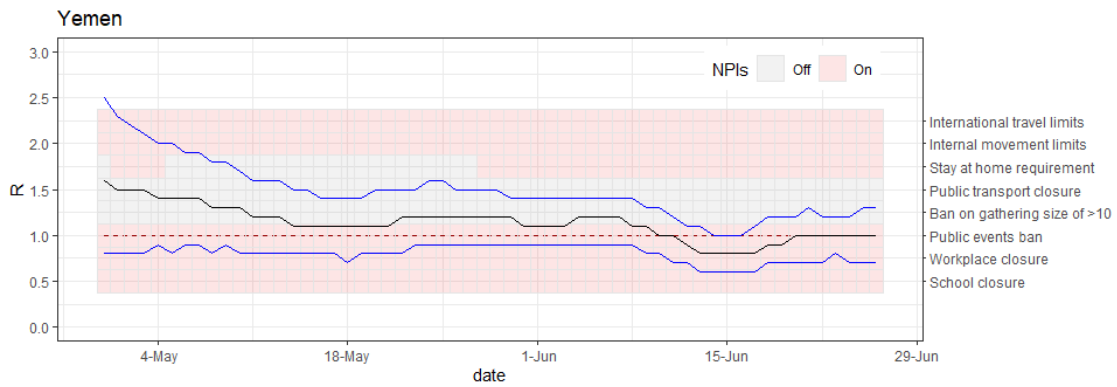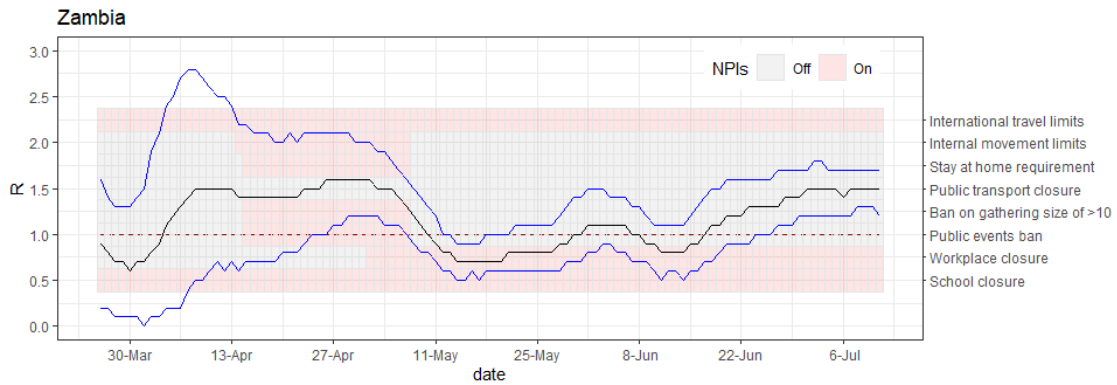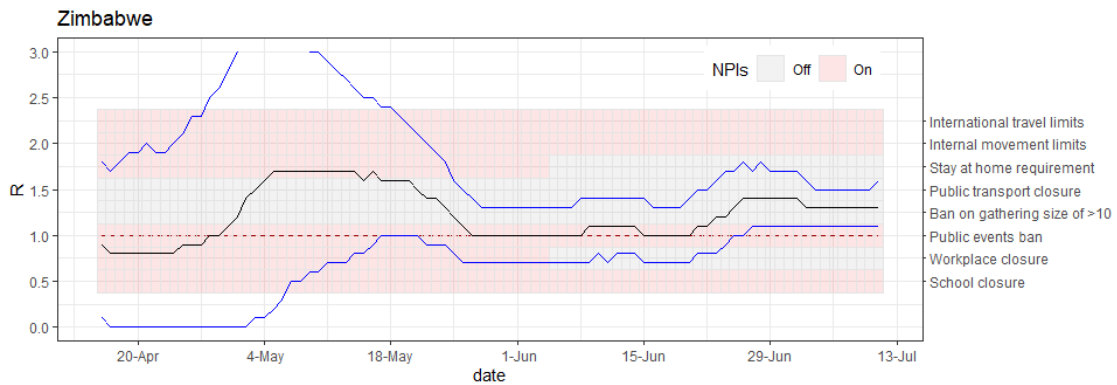

Black line and blue lines denote the point estimate and the 90% confidence intervals of the R estimates. Shaded areas denote the status of the eight NPIs. R = time-varying reproduction number; NPI = non-pharmaceutical intervention.

Figure S2. Duration of included phases by the change in NPI

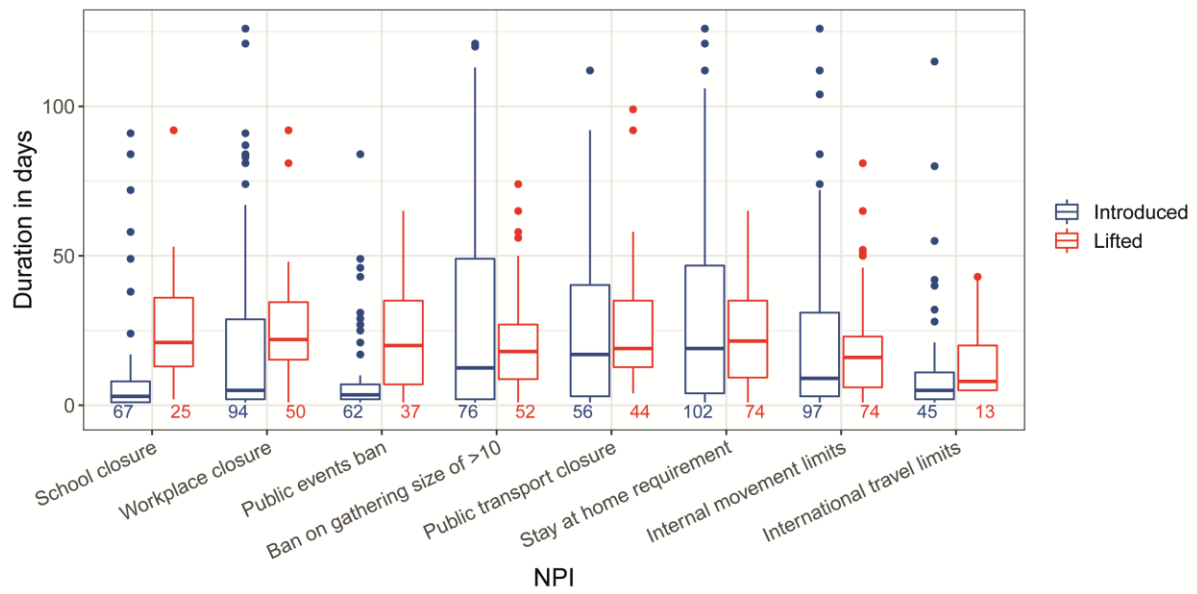

Each individual data point denotes a phase. Number of included data points is indicated below the boxplot for each NPI. NPI = non-pharmaceutical intervention.

Figure S3. Interaction effects of multiple NPIs introduced/lifted simultaneously, from the main model

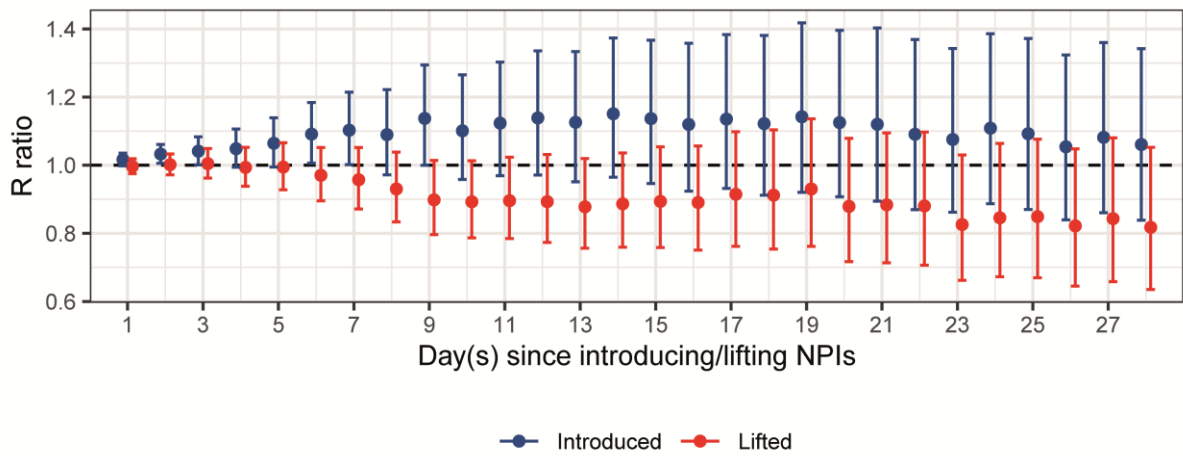

Only the additional effect (i.e. interaction effect) by multiple NPIs was presented. R ratio >1 indicates increased transmission and R ratio <1 indicates decreased transmission. NPI = non-pharmaceutical intervention.

Figure S4. Time length in days required to reach different levels of effect by introducing/lifting NPIs

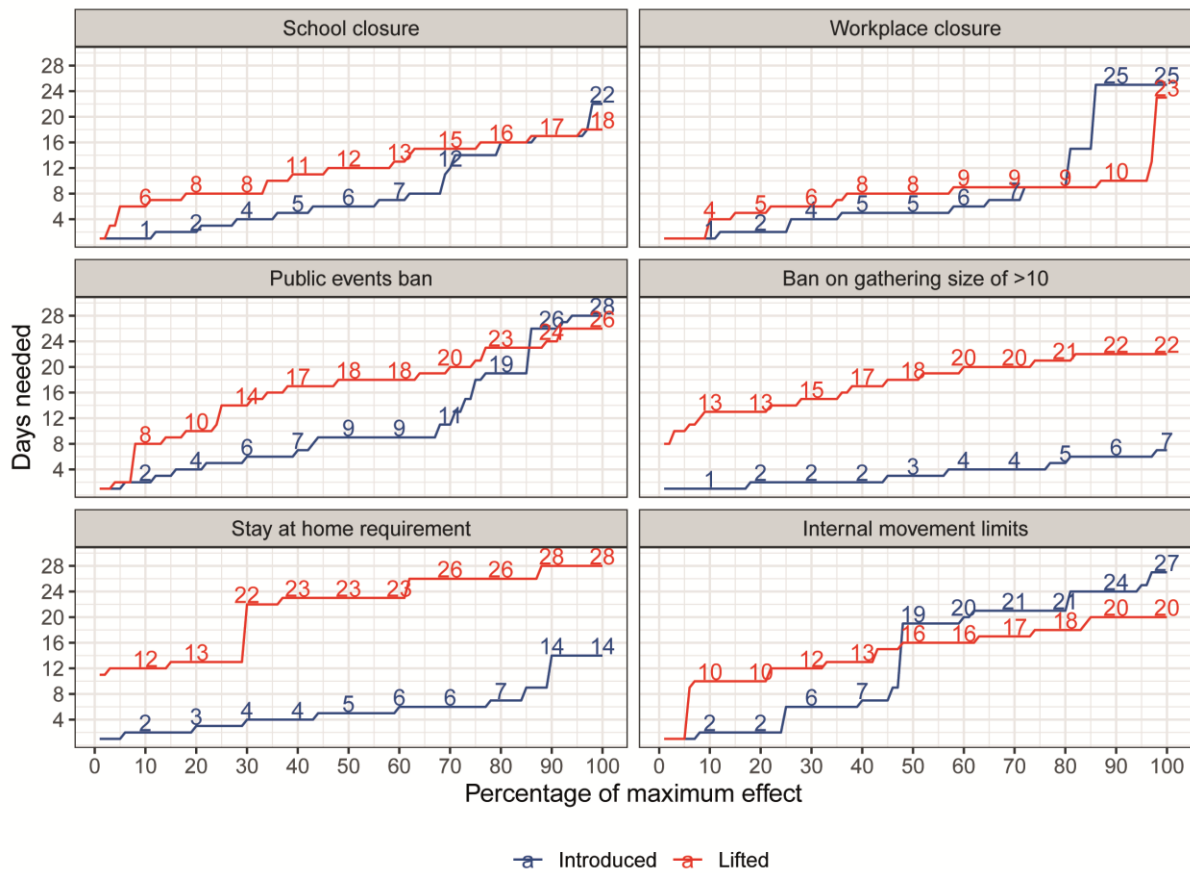

The lines show the length in days required to reach different percentage of the maximum effect of each NPI in the first 28 days following its introduction/relaxation. For the same percentage (x axis), a line on the top indicates a delay in the effect of an NPI. NPI = non-pharmaceutical intervention.

Figure S5. Effect of introducing/lifting workplace closure and requirement to stay at home on the total visits to workplace and the total time of staying at residential areas, respectively

A. Effect of introducing/lifting workplace closure on total visits to workplace

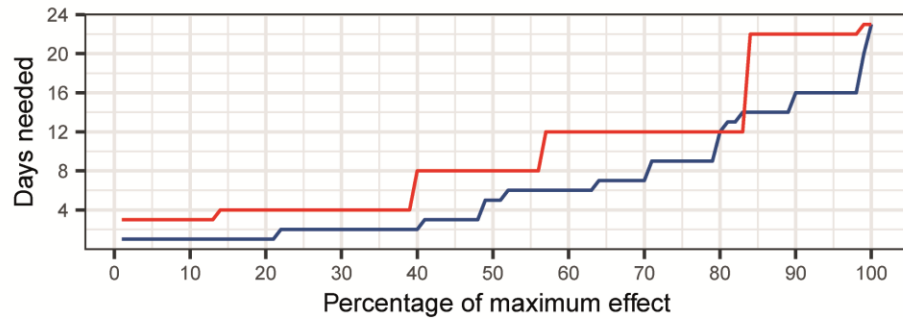

B. Effect of introducing/lifting requirement to stay at home and total time of staying at residential areas

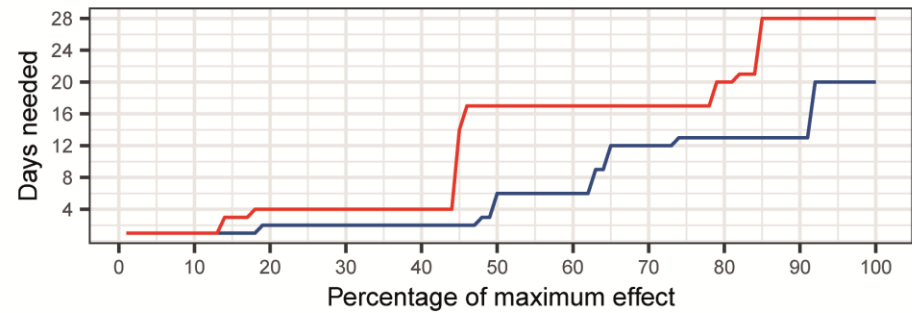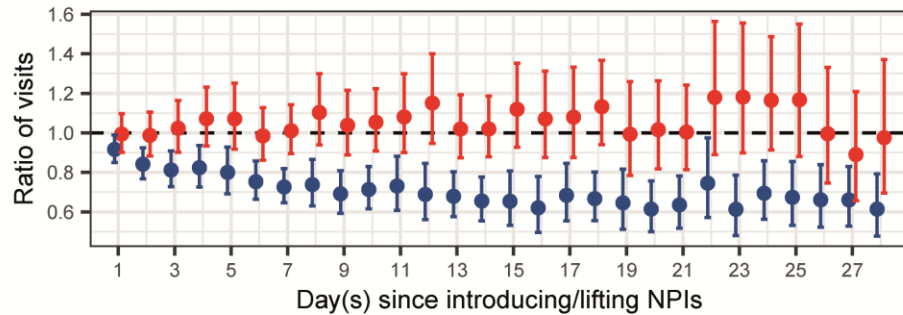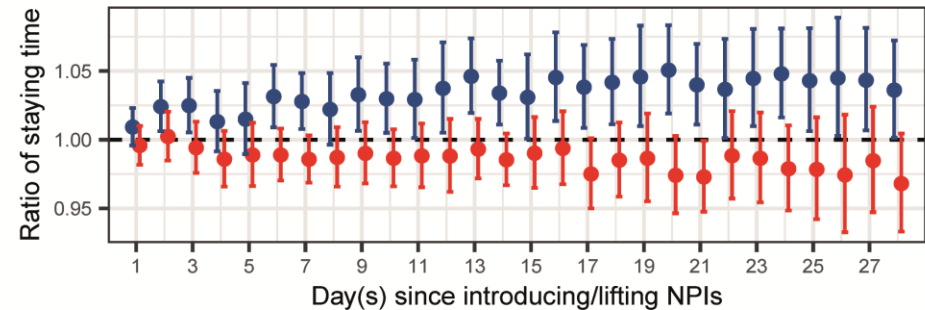

● Introduced ● Lifted

● Introduced ● Lifted

Upper figures show the time length in days required to reach different levels of effect; the lines show the length in days required to reach different percentage of the maximum effect of each NPI in the first 28 days following its introduction/relaxation. Lower figures show the change in the total visits/time measured as ratio (compared with Day 0) following the introduction and relaxation. NPI = non-pharmaceutical intervention.

Figure S6. Time length in days required to reach different levels of effect by introducing/lifting ban on gathering size of >10 persons vs >100 persons

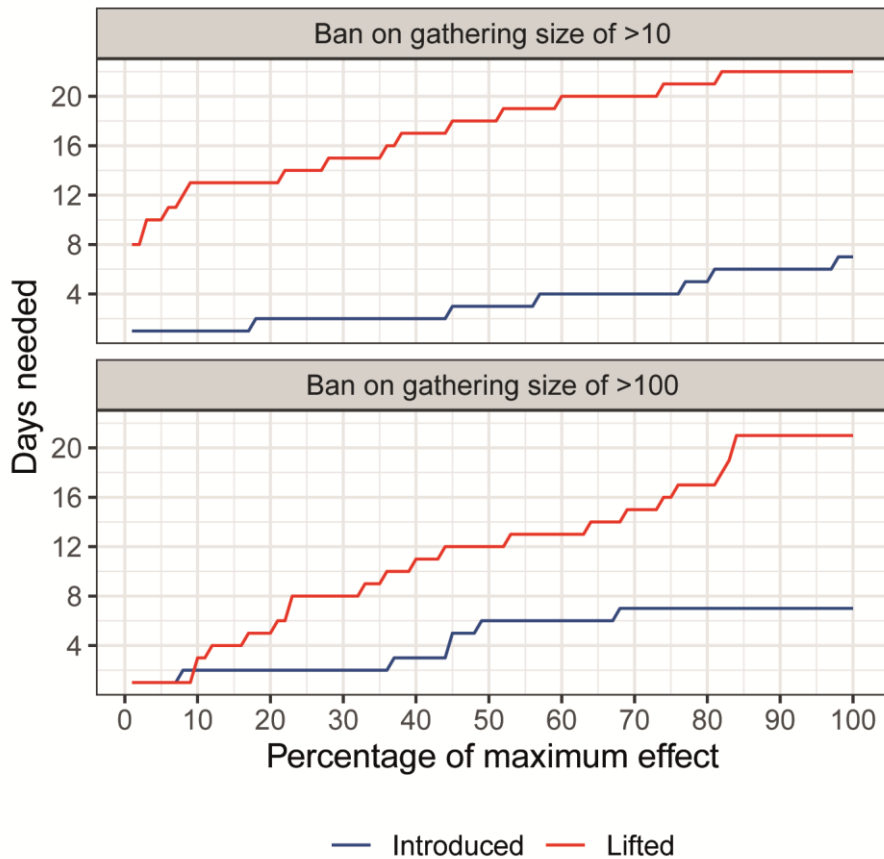

The lines show the length in days required to reach different percentage of the maximum effect of each NPI in the first 28 days following its introduction/relaxation. For the same percentage (x axis), a line on the top indicates a delay in the effect of an NPI. NPI = non-pharmaceutical intervention.

Figure S7. Results from the sensitivity analysis that only included phases during which only one NPI was changed

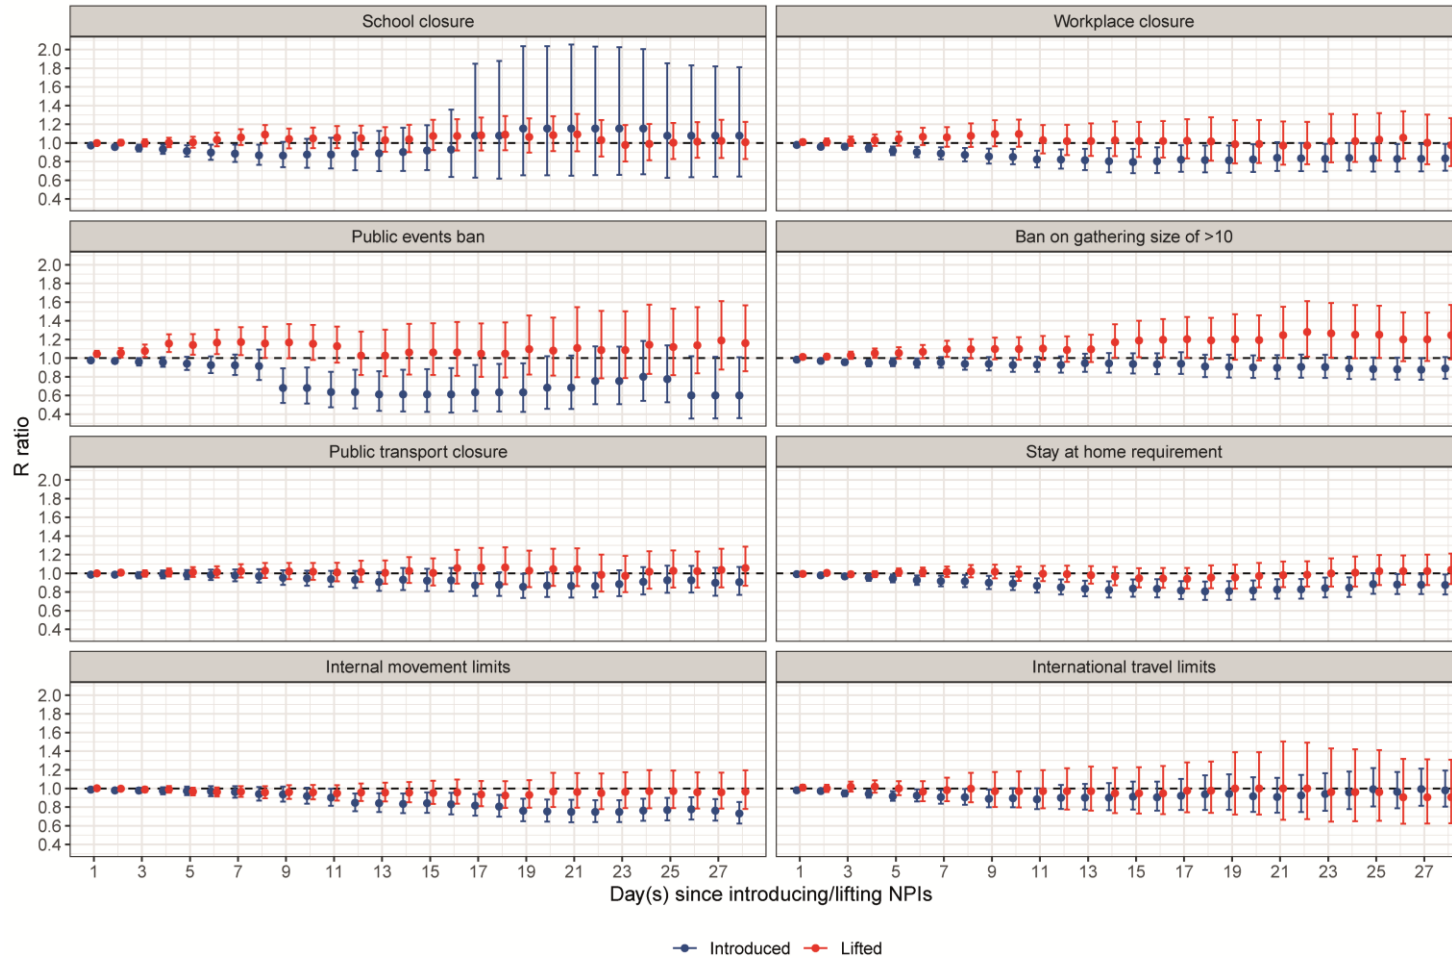

R ratio >1 indicates increased transmission and R ratio <1 indicates decreased transmission. NPI = non-pharmaceutical intervention.

Figure S8. Results from the sensitivity analysis that used the average R in the last 7 days of the previous phase for calculating R ratio

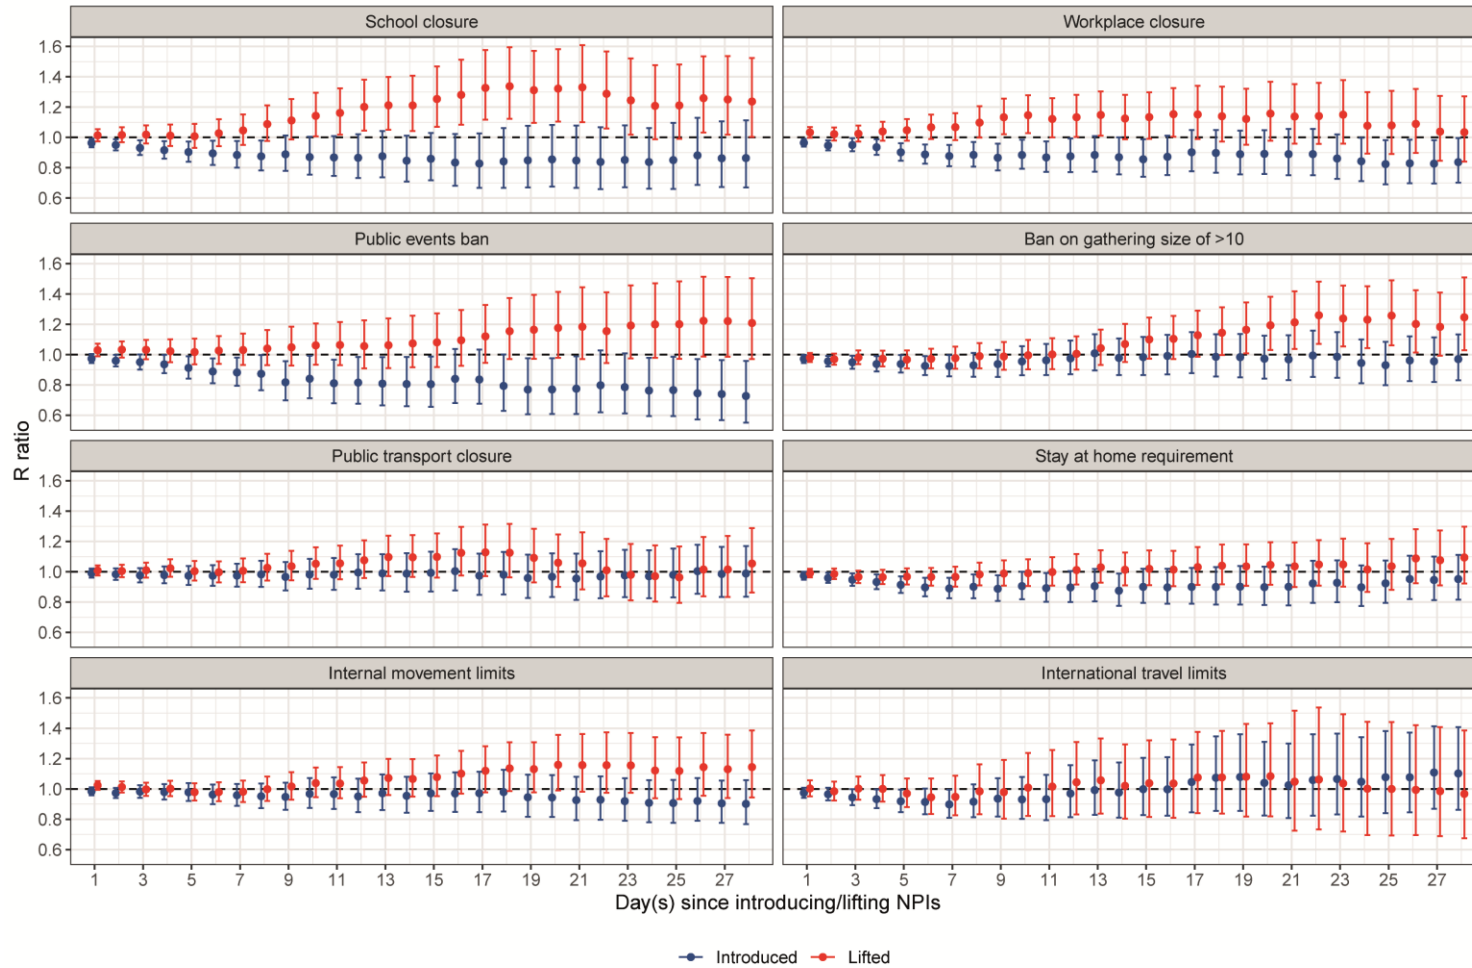

R ratio >1 indicates increased transmission and R ratio <1 indicates decreased transmission. NPI = non-pharmaceutical intervention.



Figure S9. Results from the sensitivity analysis that excluded early phases in which country's first NPI was introduced

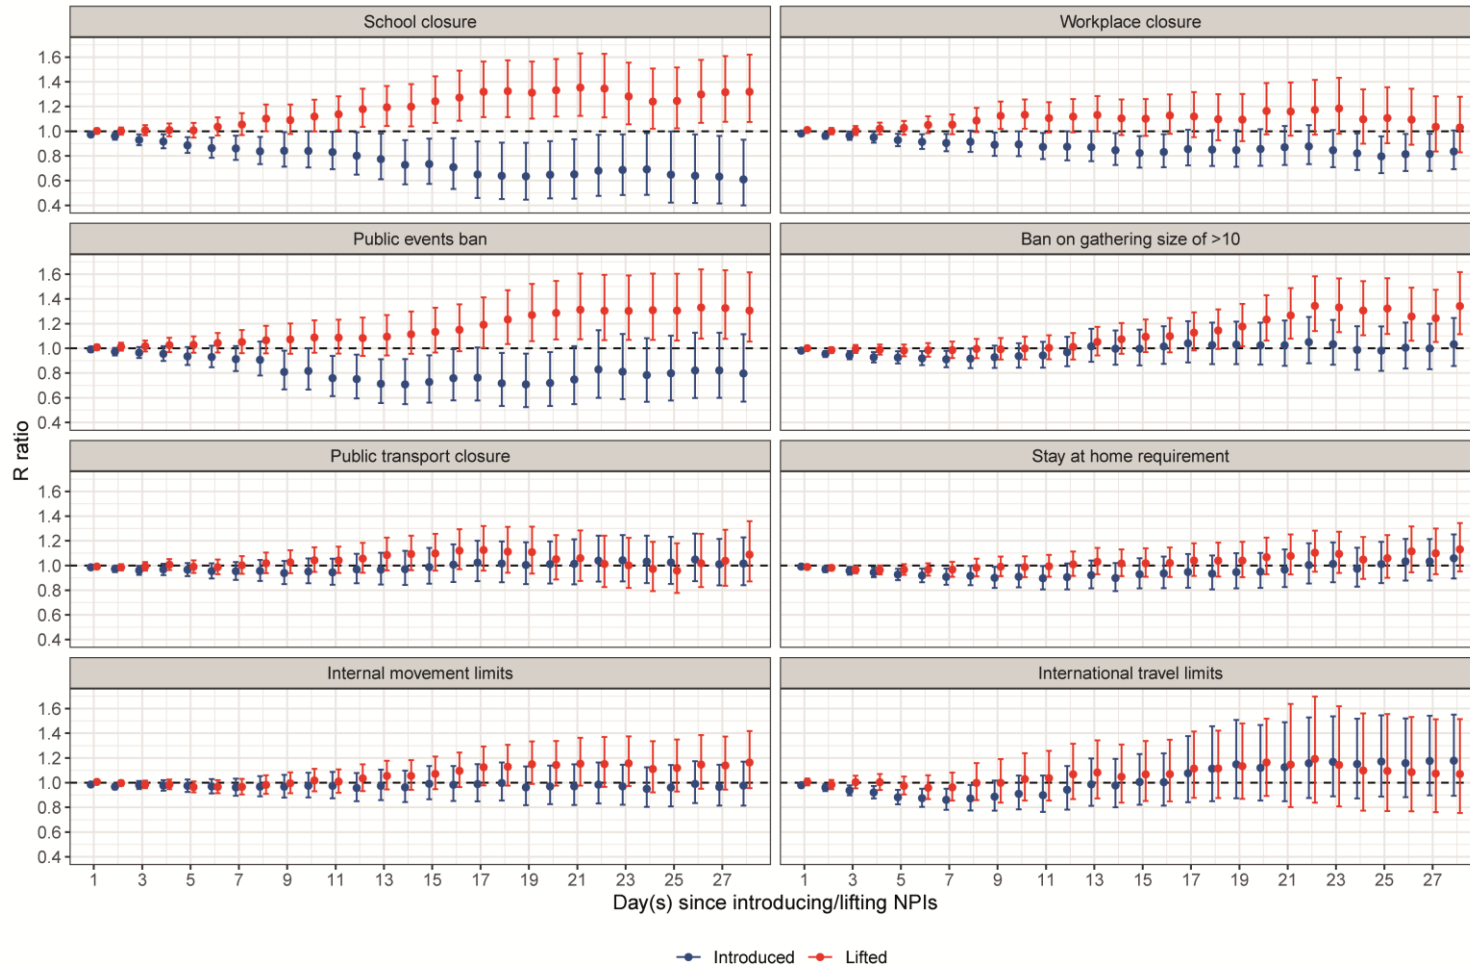

R ratio >1 indicates increased transmission and R ratio <1 indicates decreased transmission. NPI = non-pharmaceutical intervention.

Figure S10. Results from the sensitivity analysis that excluded countries that could have greater variability in NPI policies

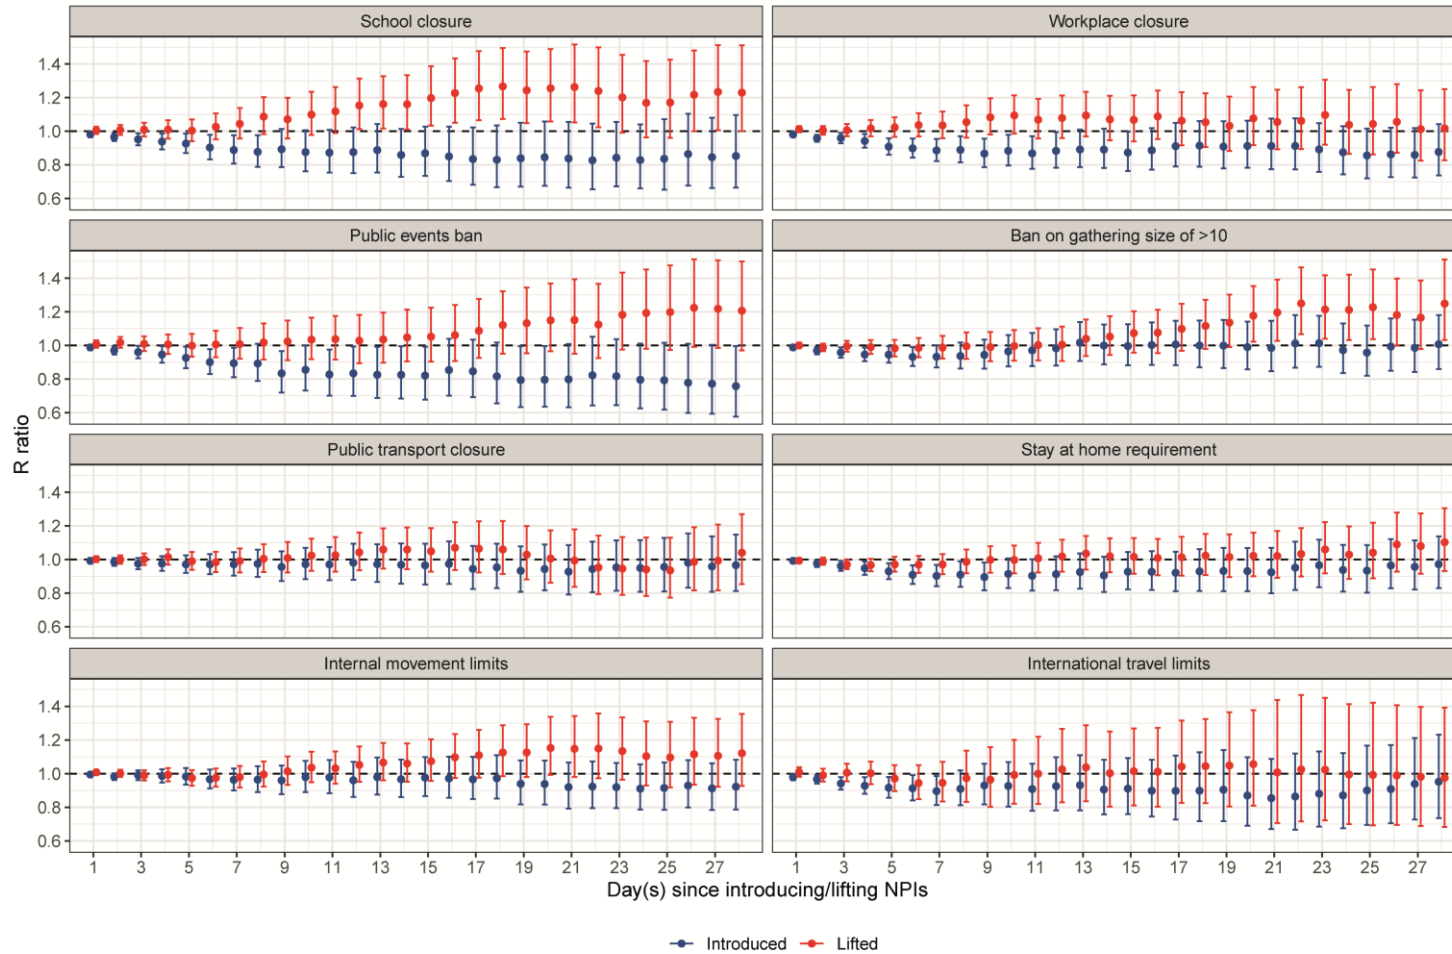

The following countries were excluded from the analysis: Brasil, Canada, China, India, Russia and United States. R ratio >1 indicates increased transmission and R ratio <1 indicates decreased transmission. NPI = non-pharmaceutical intervention.

Figure S11. Results from the sensitivity analysis that excluded 10 countries randomly each time for 20 times

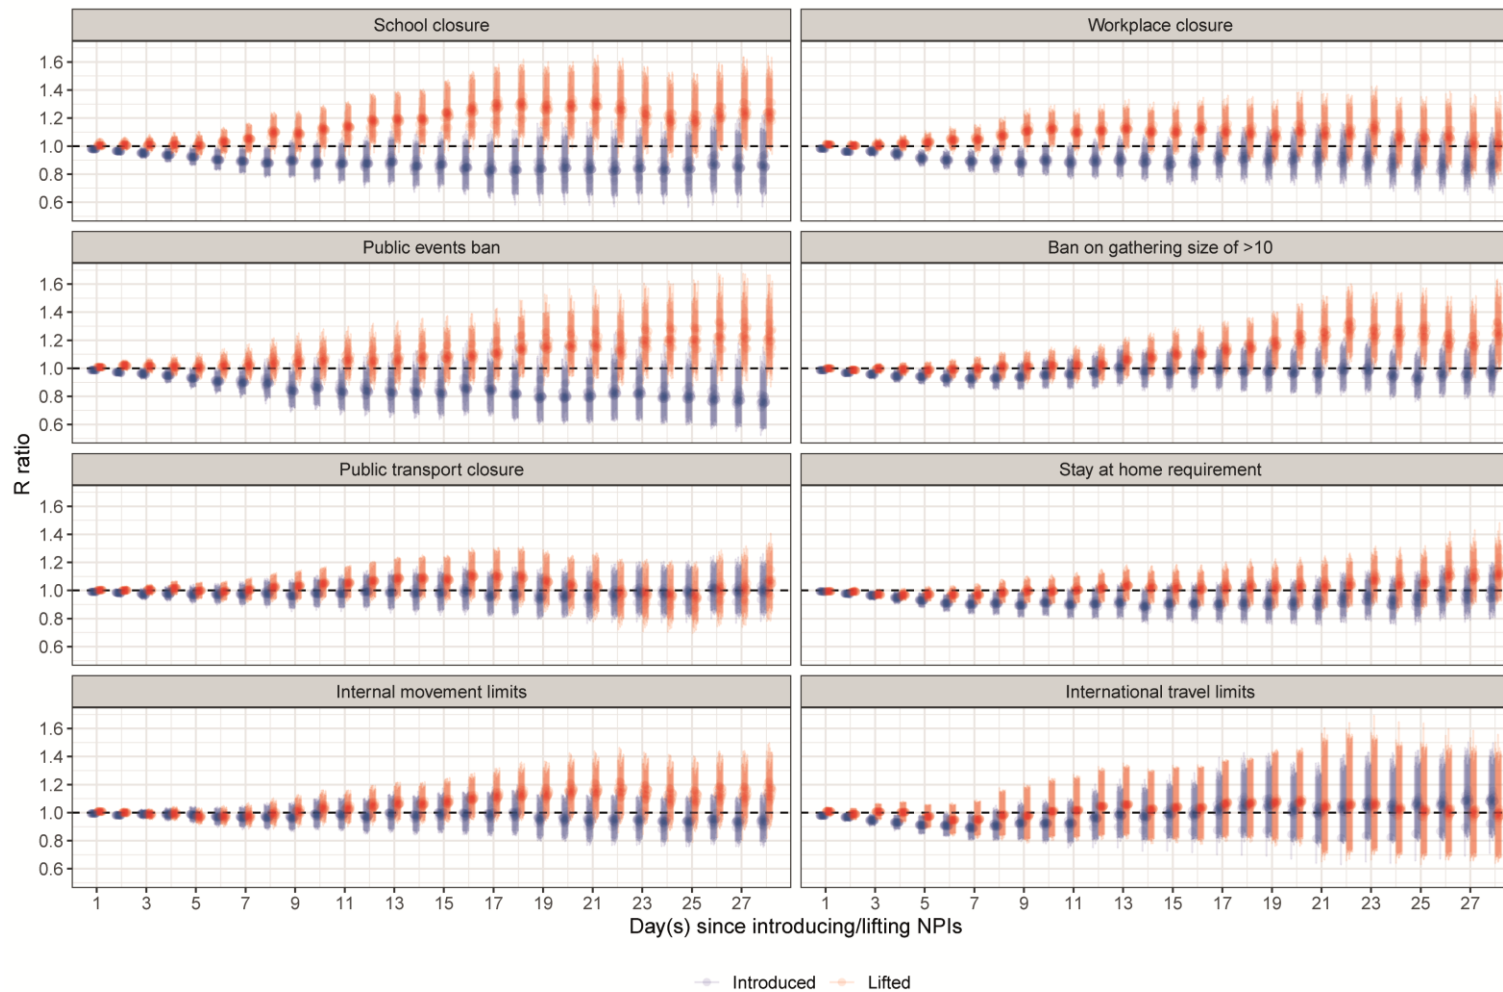

The figure represents the results from all 20 separate analyses, each of which excluded a random list of 10 countries (random seed set as 12346). The results are presented with colours of 10% transparency. For each NPI, the reference period is the day before introduction/relaxation of that NPI. R ratio >1 indicates increased transmission and R ratio <1 indicates decreased transmission. NPI = non-pharmaceutical intervention.

Figure S12. Results from the sensitivity analysis that included only phases with comprehensive testing

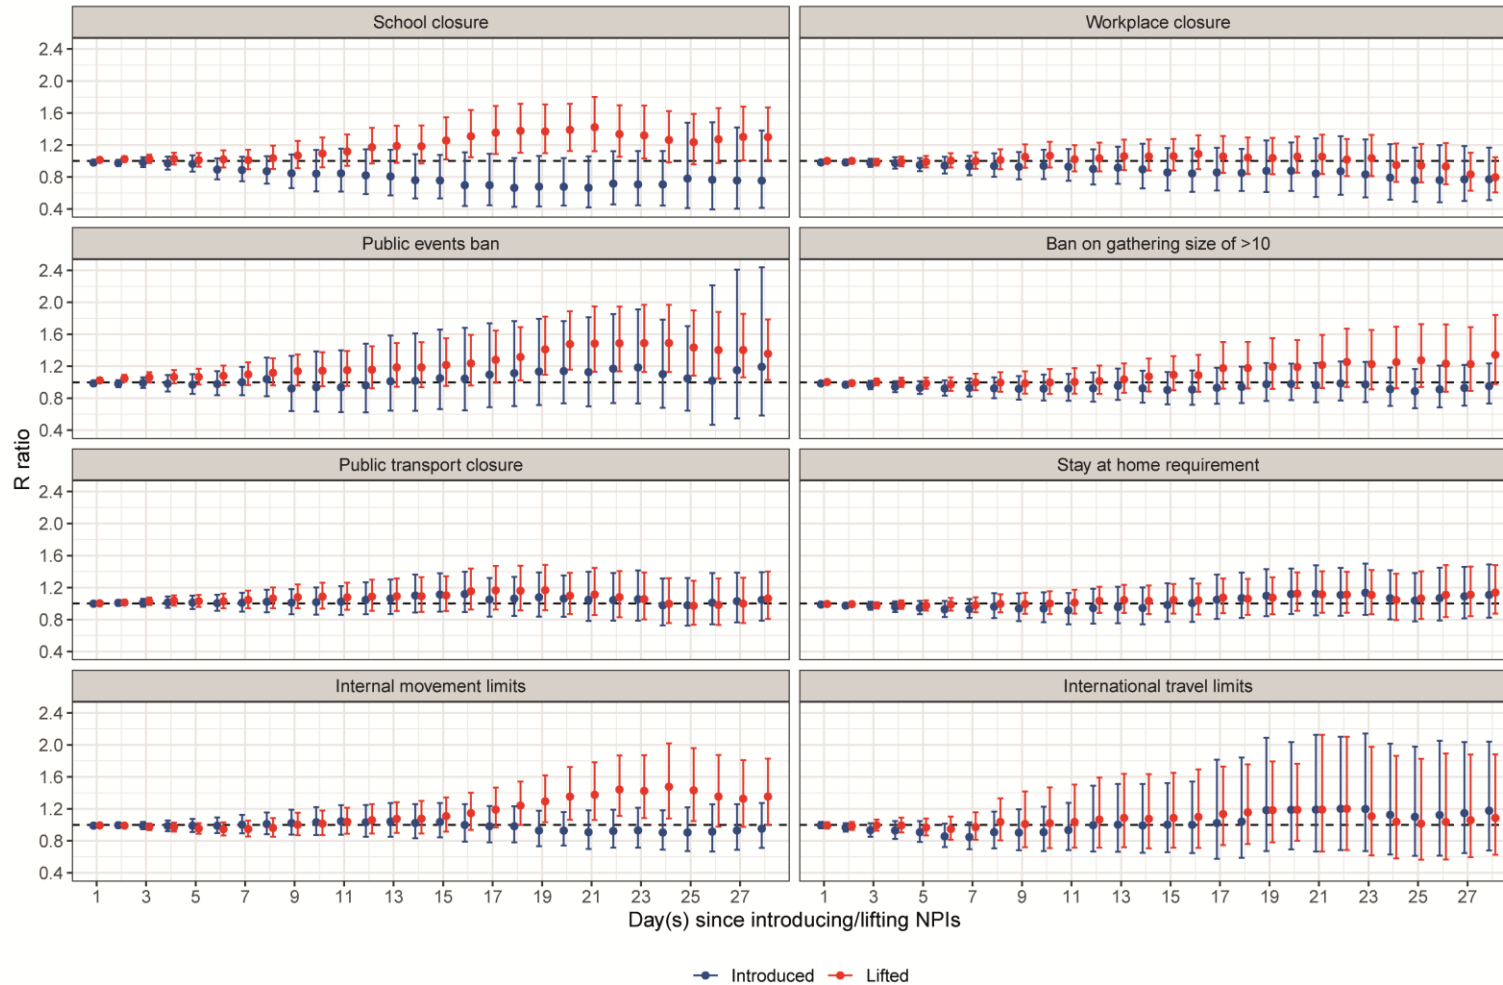

Comprehensive testing is defined by testing all patients with COVID-19 symptoms. For each NPI, the reference period is the day before introduction/relaxation of that NPI. R ratio >1 indicates increased transmission and R ratio <1 indicates decreased transmission. NPI = non-pharmaceutical intervention.

Figure S13. Results from the sensitivity analysis that included only phases with comprehensive contact tracing

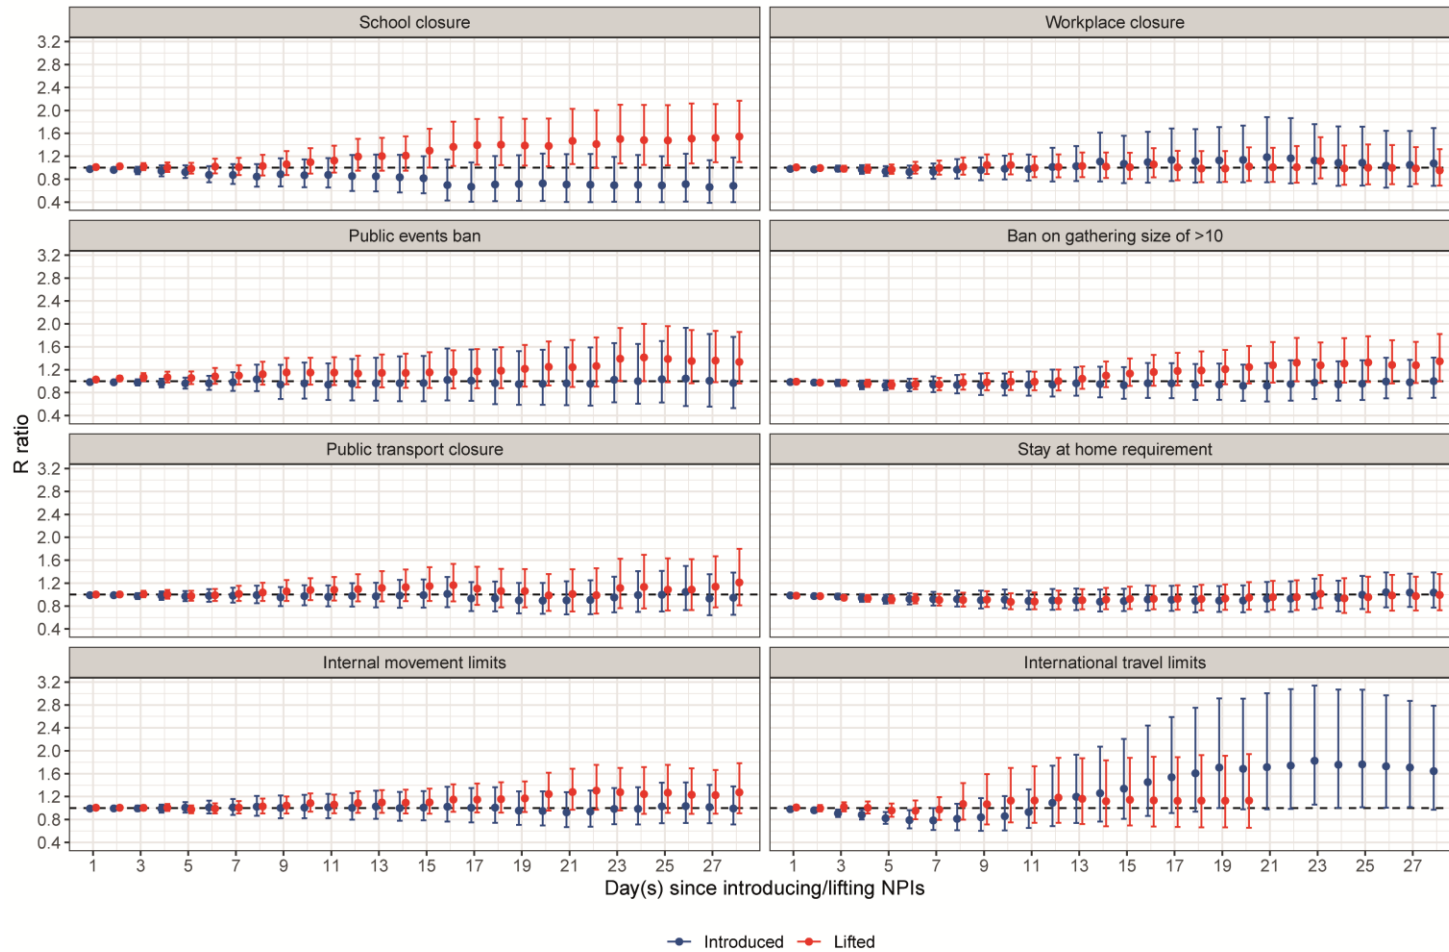

Comprehensive contact tracing is defined by conducting contact tracing for all COVID-19 cases. For each NPI, the reference period is the day before introduction/relaxation of that NPI. R ratio >1 indicates increased transmission and R ratio <1 indicates decreased transmission. NPI = non-pharmaceutical intervention.

Figure S14. Modelled change in the R ratio over time in the first 28 days since the introduction of different composites of NPIs

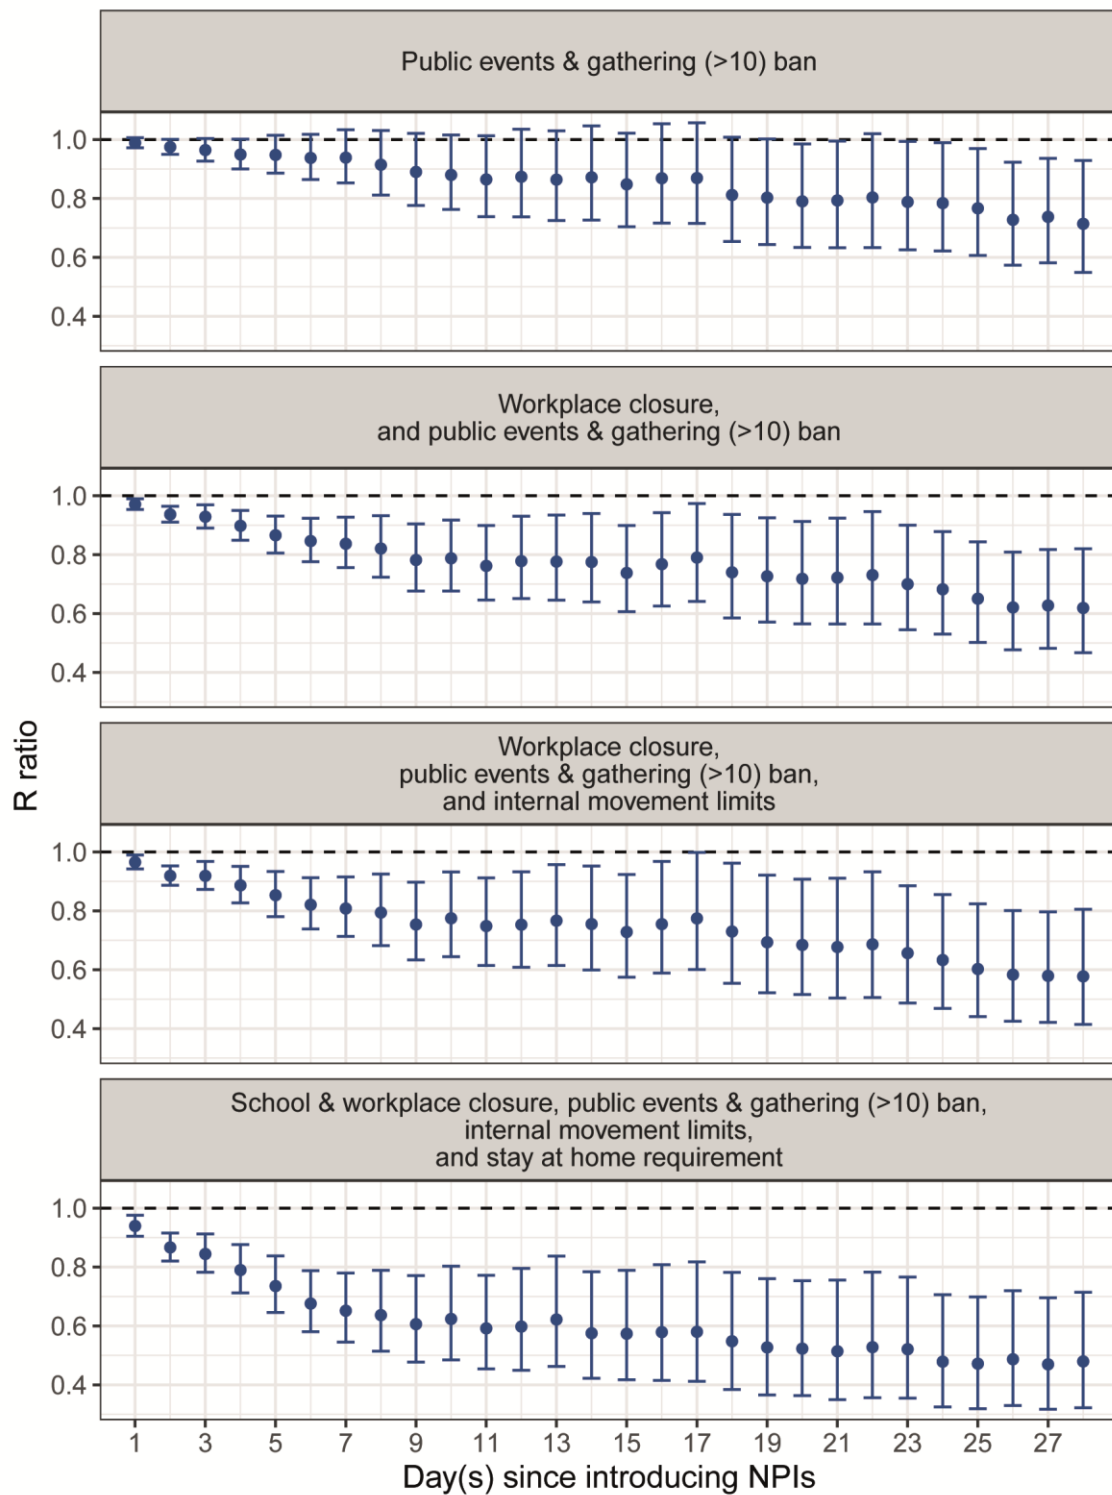

The reference period is the day before introduction of NPIs. R ratio >1 indicates increased transmission and R ratio <1 indicates decreased transmission. NPI = non-pharmaceutical intervention.
